# Supplementary material for: Multigene interactions and the prediction of depression in the Wisconsin Longitudinal Study
Source: PubMed Central journal article supplement — BMJ Open. 2012 Jul 2;2(4):e000944. doi: 10.1136/bmjopen-2012-000944 (PMC3391375; doi:10.1136/bmjopen-2012-000944), 2012-07-02
Supplement: bmjopen-2012-000944-s1.pdf [file bmjopen-2012-000944-s1.pdf]

**Supplementary Table 1.** Single Nucleotide Polymorphisms Assessed in the WLS

| Gene              | Encodes                                                             | SNP        | Associated disease/behavior                                                                                                         |
|-------------------|---------------------------------------------------------------------|------------|-------------------------------------------------------------------------------------------------------------------------------------|
| <i>A2M</i>        | alpha-2-macroglobulin                                               | rs669      | Alzheimer's disease (1)                                                                                                             |
| <i>ACVR2A</i>     | activin receptor IIA                                                | rs1424954  | pre-eclampsia (2)                                                                                                                   |
| <i>ACVR2B</i>     | activin receptor IIB                                                | rs3749386  | --                                                                                                                                  |
| <i>ADIPOQ</i>     | adiponectin, C1Q and collagen domain containing                     | rs1501299  | diabetes II (3, 4), obesity (5, 6), breast cancer (7)                                                                               |
| <i>ADIPOQ</i>     | adiponectin, C1Q and collagen domain containing                     | rs2241766  | diabetes II (3, 4), obesity (8), breast cancer (7)                                                                                  |
| <i>ACVRL1</i>     | activin receptor-like kinase 1                                      | rs2071219  | brain arteriovenous malformations (9)                                                                                               |
| <i>APOC-3</i>     | apolipoprotein C-III                                                | rs2854116  | nonalcoholic fatty liver disease (10)                                                                                               |
| <i>ApoE</i>       | apolipoprotein E                                                    | rs429358   | Alzheimer's disease (11, 12)                                                                                                        |
| <i>ApoE</i>       | apolipoprotein E                                                    | rs7412     | Alzheimer's disease (11, 12)                                                                                                        |
| <i>AR</i>         | androgen receptor                                                   | rs6152     | male pattern baldness (13)                                                                                                          |
| <i>BCKDHB</i>     | branched chain keto acid dehydrogenase E1, beta polypeptide         | rs4502885  | premature ovarian failure (14)                                                                                                      |
| <i>BDNF</i>       | brain-derived neurotrophic factor                                   | rs6265     | depression (15-17), alcohol dependence-related depression (18), bipolar disorder (19), schizophrenia (20), cognition (21), BMI (22) |
| <i>BDNF</i>       | brain-derived neurotrophic factor                                   | rs908867   | antidepressant response (23)                                                                                                        |
| <i>BRCA1</i>      | breast cancer 1, early onset                                        | rs1799966  | breast cancer (24)                                                                                                                  |
| <i>BRCA2</i>      | breast cancer 2, early onset homolog                                | rs144848   | breast cancer (24)                                                                                                                  |
| <i>CH25H</i>      | cholesterol 25-hydroxylase                                          | rs3802657  | --                                                                                                                                  |
| <i>CHRM2</i>      | cholinergic receptor, muscarinic 2                                  | rs2061174  | alcohol dependence, depression (25)                                                                                                 |
| <i>CHRM2</i>      | cholinergic receptor, muscarinic 2                                  | rs8191992  | cognition (26)                                                                                                                      |
| <i>COMT</i>       | catechol-O-methyltransferase                                        | rs4680     | ADHD (27), substance abuse (28-31), depression (32), antidepressant response (33), bipolar disorder (34), cognition (35)            |
| <i>CTSD</i>       | cathepsin D                                                         | rs17571    | Alzheimer's disease (36)                                                                                                            |
| <i>CYP11A1</i>    | cytochrome P450, family 11, subfamily A, polypeptide 1              | rs8039957  | breast cancer (37)                                                                                                                  |
| <i>CYP11B2</i>    | cytochrome P450, family 11, subfamily B, polypeptide 2              | rs1799998  | stroke (38), cardiovascular disease (39)                                                                                            |
| <i>DAT1</i>       | human dopamine transporter                                          | rs11564774 | ADHD (40)                                                                                                                           |
| <i>DAT1</i>       | human dopamine transporter                                          | rs2963238  | alcohol-withdrawal seizures (41)                                                                                                    |
| <i>DISC1</i>      | disrupted in schizophrenia 1                                        | rs821616   | schizophrenia (42), cognitive aging (43)                                                                                            |
| <i>DRD2</i>       | dopamine receptor D2                                                | rs17529477 | --                                                                                                                                  |
| <i>DRD2/ANKK1</i> | dopamine receptor D2/ ankyrin repeat and kinase domain containing 1 | rs1800497  | obesity, drug addiction (44)                                                                                                        |
| <i>DRD2</i>       | dopamine receptor D2                                                | rs2242592  | schizophrenia (45)                                                                                                                  |
| <i>DRD2</i>       | dopamine receptor D2                                                | rs4245147  | --                                                                                                                                  |
| <i>DRD2</i>       | dopamine receptor D2                                                | rs6277     | schizophrenia (46), PTSD (47)                                                                                                       |
| <i>DRD4</i>       | dopamine receptor D4                                                | rs1800955  | ADHD (48), heroine addiction (49)                                                                                                   |
| <i>DTNBP1</i>     | dystrobrevin-binding protein 1                                      | rs1018381  | schizophrenia (50), cognitive ability (51)                                                                                          |
| <i>DTNBP1</i>     | dystrobrevin-binding protein 1                                      | rs760761   | schizophrenia (52)                                                                                                                  |
| <i>ESR1</i>       | estrogen receptor 1                                                 | rs7761133  | --                                                                                                                                  |
| <i>ESR1</i>       | estrogen receptor 1                                                 | rs3853248  | --                                                                                                                                  |
| <i>FADS2</i>      | fatty acid desaturase 2                                             | rs1535     | breastfeeding & IQ (53)                                                                                                             |

|                |                                             |            |                                                                             |
|----------------|---------------------------------------------|------------|-----------------------------------------------------------------------------|
| <i>FADS2</i>   | fatty acid desaturase 2                     | rs174575   | breastfeeding & IQ (53)                                                     |
| <i>FMR1</i>    | fragile X mental retardation 1              | rs1805420  | --                                                                          |
| <i>FSH</i>     | follicle stimulating hormone                | rs6169     | --                                                                          |
| <i>FSHR</i>    | follicle stimulating hormone receptor       | rs6166     | sterility (54), osteoporosis (55)                                           |
| <i>FST</i>     | follistatin                                 | rs12152850 | --                                                                          |
| <i>FST</i>     | follistatin                                 | rs3797297  | --                                                                          |
| <i>FTO</i>     | fat mass and obesity associated             | rs1421085  | obesity (56-58), mental disorders (59)                                      |
| <i>GABBR2</i>  | $\gamma$ -aminobutyric acid B receptor 2    | rs1435252  | nicotine addiction (60)                                                     |
| <i>GABBR2</i>  | $\gamma$ -aminobutyric acid B receptor 2    | rs2779562  | nicotine addiction (60)                                                     |
| <i>GNRH1</i>   | gonadotropin-releasing hormone              | novel SNP  | Alzheimer's disease (61)                                                    |
| <i>HERC</i>    | hect domain and RLD 2                       | rs12913832 | eye color (62, 63)                                                          |
| <i>HFE</i>     | hemochromatosis                             | rs1799945  | hemochromatosis(64)                                                         |
| <i>HSD17B1</i> | estradiol 17 $\beta$ -dehydrogenase 1       | rs12602084 | steroid metabolism (65)                                                     |
| <i>HSD17B1</i> | estradiol 17 $\beta$ -dehydrogenase 1       | rs592389   | vasomotor symptoms (66), cognition (67)                                     |
| <i>5-HTR1A</i> | 5-hydroxytryptamine (serotonin) receptor 1A | rs878567   | mood disorders (68)                                                         |
| <i>5-HTR2A</i> | 5-hydroxytryptamine (serotonin) receptor 2A | rs6312     | --                                                                          |
| <i>5-HTR2A</i> | 5-hydroxytryptamine (serotonin) receptor 2A | rs6314     | antidepressant response (69), bipolar disorder (70)                         |
| <i>5-HTR2A</i> | 5-hydroxytryptamine (serotonin) receptor 2A | rs7997012  | antidepressant response (71)                                                |
| <i>5-HTR2C</i> | 5-hydroxytryptamine (serotonin) receptor 2C | rs6318     | bipolar disorder (72), depression (73)                                      |
| <i>5-HTT</i>   | 5-hydroxytryptamine transporter             | rs25533    | antidepressant response (74)                                                |
| <i>5-HTT</i>   | 5-hydroxytryptamine transporter             | rs8076005  | depressive symptoms (75)                                                    |
| <i>IGF1</i>    | insulin-like growth factor 1                | rs12313279 | --                                                                          |
| <i>IL1A</i>    | interleukin 1, alpha                        | rs17561    | chronic rhinosinusitis (76), BMI (77)                                       |
| <i>IL6</i>     | interleukin 6                               | rs1800795  | arthritis (78), breast cancer (79), diabetes (80), depression (81)          |
| <i>INHA</i>    | inhibin alpha                               | rs2059693  | testicular cancer (82)                                                      |
| <i>INHA</i>    | inhibin alpha                               | rs35118453 | --                                                                          |
| <i>INHBA</i>   | inhibin beta A                              | rs2237436  | --                                                                          |
| <i>INHBB</i>   | inhibin beta B                              | rs11902591 | --                                                                          |
| <i>KIBRA</i>   | kidney and brain protein (WWC1)             | rs17070145 | Alzheimer's disease (83), episodic memory (84)                              |
| <i>LEPR</i>    | leptin receptor                             | rs1137100  | diabetes II (85), atherosclerosis (86)                                      |
| <i>LHR</i>     | luteinizing hormone receptor                | rs4073366  | Alzheimer's disease (87)                                                    |
| <i>MAOA</i>    | monoamine oxidase A                         | rs3788862  | pain (88)                                                                   |
| <i>OXTR</i>    | oxytocin receptor                           | rs2254298  | autism (89, 90), social loneliness (91), depressive symptoms & anxiety (92) |
| <i>PCK1</i>    | phosphoenolpyruvate carboxykinase 1         | rs707555   | diabetes II (93)                                                            |
| <i>PGR</i>     | progesterone receptor                       | rs1042838  | ovarian cancer (94), migraine (95), menstruation (96), pregnancy loss (97)  |
| <i>SNAP25</i>  | synaptosomal-associated protein 25          | rs363050   | intelligence (98, 99)                                                       |
| <i>SSADH</i>   | succinic semialdehyde dehydrogenase         | rs2760118  | --                                                                          |
| <i>StAR</i>    | steroidogenic acute regulatory protein      | rs3990403  | --                                                                          |
| <i>TFAM</i>    | transcription factor A, mitochondrial       | rs1937     | Alzheimer's disease (100)                                                   |
| <i>TFAM</i>    | transcription factor A, mitochondrial       | rs2306604  | Parkinson's disease (101)                                                   |
| <i>TPH1</i>    | first tryptophan hydroxylase isoform        | rs1799913  | heroin addiction (102)                                                      |

## REFERENCES

1. Zappia M, Manna I, Serra P, Cittadella R, Andreoli V, La Russa A, et al. Increased risk for Alzheimer disease with the interaction of MPO and A2M polymorphisms. *Arch Neurol*. 2004 Mar;61(3):341-4.
2. Moses EK, Fitzpatrick E, Freed KA, Dyer TD, Forrest S, Elliott K, et al. Objective prioritization of positional candidate genes at a quantitative trait locus for pre-eclampsia on 2q22. *Molecular Human Reproduction*. 2006 August 2006;12(8):505-12.
3. Hara K, Boutin P, Mori Y, Tobe K, Dina C, Yasuda K, et al. Genetic Variation in the Gene Encoding Adiponectin Is Associated With an Increased Risk of Type 2 Diabetes in the Japanese Population. *Diabetes*. 2002 February 1, 2002;51(2):536-40.
4. Gu HF, Abulaiti A, Ostenson CG, Humphreys K, Wahlestedt C, Brookes AJ, et al. Single nucleotide polymorphisms in the proximal promoter region of the adiponectin (APM1) gene are associated with type 2 diabetes in Swedish caucasians. *Diabetes*. 2004 Feb;53 Suppl 1:S31-5.
5. Bouatia-Naji N, Meyre D, Lobbens S, Seron K, Fumeron F, Balkau B, et al. ACDC/adiponectin polymorphisms are associated with severe childhood and adult obesity. *Diabetes*. 2006 Feb;55(2):545-50.
6. Yang W-S, Yang Y-C, Chen C-L, Wu I-L, Lu J-Y, Lu F-H, et al. Adiponectin SNP276 is associated with obesity, the metabolic syndrome, and diabetes in the elderly. *The American Journal of Clinical Nutrition*. 2007 August 1, 2007;86(2):509-13.
7. Kaklamani VG, Sadim M, Hsi A, Offit K, Oddoux C, Ostrer H, et al. Variants of the adiponectin and adiponectin receptor 1 genes and breast cancer risk. *Cancer Res*. 2008 May 1;68(9):3178-84.
8. Beckers S, Peeters AV, De Freitas F, Mertens IL, Verhulst SL, Haentjens D, et al. Association Study and Mutation Analysis of Adiponectin Shows Association of Variants in APM1 with Complex Obesity in Women. *Annals of Human Genetics*. 2009;73(5):492-501.
9. Young WL, Kwok P-Y, Pawlikowska L, Lawton MT, Kim H, Hysi PG, et al. Arteriovenous Malformation. *Journal of Neurosurgery*. 2007;106(4):731-2.
10. Petersen KF, Dufour S, Hariri A, Nelson-Williams C, Foo JN, Zhang X-M, et al. Apolipoprotein C3 Gene Variants in Nonalcoholic Fatty Liver Disease. *New England Journal of Medicine*. 2010;362(12):1082-9.
11. Corder EH, Saunders AM, Strittmatter WJ, Schmechel DE, Gaskell PC, Small GW, et al. Gene dose of apolipoprotein E type 4 allele and the risk of Alzheimer's disease in late onset families. *Science*. 1993;261(5123):921-3.
12. Saunders AM, Strittmatter WJ, Schmechel D, George-Hyslop PH, Pericak-Vance MA, Joo SH, et al. Association of apolipoprotein E allele epsilon 4 with late-onset familial and sporadic Alzheimer's disease. *Neurology*. 1993;43(8):1467-72.
13. Ellis JA, Stebbing M, Harrap SB. Polymorphism of the Androgen Receptor Gene is Associated with Male Pattern Baldness. 2001;116(3):452-5.
14. Kang H, Lee SK, Cho S-W, Lee S-H, Kwack K. Branched chain [alpha]-keto acid dehydrogenase, E1-[beta] subunit gene is associated with premature ovarian failure. *Fertility and Sterility*. 2008;89(3):728-31.

15. Hwang J-P, Tsai S-J, Hong C-J, Yang C-H, Lirng J-F, Yang Y-M. The Val66Met polymorphism of the brain-derived neurotrophic-factor gene is associated with geriatric depression. *Neurobiology of Aging*. 2006;27(12):1834-7.
16. Czira ME, Wersching H, Baune BT, Berger K. Brain-derived neurotrophic factor gene polymorphisms, neurotransmitter levels, and depressive symptoms in an elderly population. *Age (Dordr)*. 2011 Sep 7.
17. Suchanek R, Owczarek A, Kowalczyk M, Kucia K, Kowalski J. Association between C-281A and val66met functional polymorphisms of BDNF gene and risk of recurrent major depressive disorder in Polish population. *J Mol Neurosci*. 2011 Mar;43(3):524-30.
18. Su N, Zhang L, Fei F, Hu H, Wang K, Hui H, et al. The brain-derived neurotrophic factor is associated with alcohol dependence-related depression and antidepressant response. *Brain Research*. 2011;1415(0):119-26.
19. Sears C, Markie D, Olds R, Fitches A. Evidence of associations between bipolar disorder and the brain-derived neurotrophic factor (BDNF) gene. *Bipolar Disorders*. 2011;13(7-8):630-7.
20. Zakharyan R, Boyajyan A, Arakelyan A, Gevorgyan A, Mrazek F, Petrek M. Functional variants of the genes involved in neurodevelopment and susceptibility to schizophrenia in an Armenian population. *Human Immunology*. 2011;72(9):746-8.
21. McAllister TW, Tyler AL, Flashman LA, Rhodes CH, McDonald BC, Saykin AJ, et al. Polymorphisms in the brain-derived neurotrophic factor gene influence memory and processing speed one month after brain injury. *J Neurotrauma*. 2012 Apr 10;29(6):1111-8.
22. Hong K-W, Lim J-E, Go MJ, Shin Cho Y, Ahn Y, Han B-G, et al. Recapitulation of the Association of the Val66Met Polymorphism of BDNF Gene With BMI in Koreans. *Obesity*. 2011.
23. Gratacos M, Soria V, Urretavizcaya M, Gonzalez JR, Crespo JM, Bayes M, et al. A brain-derived neurotrophic factor (BDNF) haplotype is associated with antidepressant treatment outcome in mood disorders. *Pharmacogenomics J*. 2007;8(2):101-12.
24. Johnson N, Fletcher O, Palles C, Rudd M, Webb E, Sellick G, et al. Counting potentially functional variants in BRCA1, BRCA2 and ATM predicts breast cancer susceptibility. *Human Molecular Genetics*. 2007 May 1, 2007;16(9):1051-7.
25. Wang JC, Hinrichs AL, Stock H, Budde J, Allen R, Bertelsen S, et al. Evidence of common and specific genetic effects: association of the muscarinic acetylcholine receptor M2 (CHRM2) gene with alcohol dependence and major depressive syndrome. *Human Molecular Genetics*. 2004 September 1, 2004;13(17):1903-11.
26. Jones KA, Porjesz B, Almasy L, Bierut L, Goate A, Wang JC, et al. Linkage and linkage disequilibrium of evoked EEG oscillations with CHRM2 receptor gene polymorphisms: implications for human brain dynamics and cognition. *International Journal of Psychophysiology*. 2004;53(2):75-90.
27. Eisenberg J, Mei-Tal G, Steinberg A, Tartakovsky E, Zohar A, Gritsenko I, et al. Haplotype relative risk study of catechol-O-methyltransferase (COMT) and attention deficit hyperactivity disorder (ADHD): Association of the high-enzyme activity val allele with adhd impulsive-hyperactive phenotype. *American Journal of Medical Genetics*. 1999;88(5):497-502.
28. Wang T, Franke P, Neidt H, Cichon S, Knapp M, Lichtermann D, et al. Association study of the low-activity allele of catechol-O-methyltransferase and alcoholism using a family-based approach. *Mol Psychiatry*. 2001 Jan;6(1):109-11.
29. Horowitz R, Kotler M, Shufman E, Aharoni S, Kremer I, Cohen H, et al. Confirmation of an excess of the high enzyme activity COMT val allele in heroin addicts in a family-based haplotype relative risk study. *American Journal of Medical Genetics*. 2000;96(5):599-603.

30. Vandenberg DJ, Rodriguez LA, Miller IT, Uhl GR, Lachman HM. High-activity catechol-O-methyltransferase allele is more prevalent in polysubstance abusers. *American Journal of Medical Genetics*. 1997;74(4):439-42.
31. Li T, Chen C-k, Hu X, Ball D, Lin S-K, Chen W, et al. Association analysis of the DRD4 and COMT genes in methamphetamine abuse. *American Journal of Medical Genetics Part B: Neuropsychiatric Genetics*. 2004;129B(1):120-4.
32. Åberg E, Fandiño-Losada A, Sjöholm LK, Forsell Y, Lavebratt C. The functional Val158Met polymorphism in catechol-O-methyltransferase (COMT) is associated with depression and motivation in men from a Swedish population-based study. *Journal of Affective Disorders*. 2011;129(1–3):158-66.
33. Baune BT, Hohoff C, Berger K, Neumann A, Mortensen S, Roehrs T, et al. Association of the COMT val158met Variant with Antidepressant Treatment Response in Major Depression. *Neuropsychopharmacology*. 2007;33(4):924-32.
34. Lee S-Y, Chen S-L, Chen S-H, Huang S-Y, Tzeng N-S, Chang Y-H, et al. The COMT and DRD3 genes interacted in bipolar I but not bipolar II disorder. *World Journal of Biological Psychiatry*. 2011;12(5):385-91.
35. Dickinson D, Elvevåg B. Genes, cognition and brain through a COMT lens. *Neuroscience*. 2009;164(1):72-87.
36. Albayrak Ö, Tirniceriu A, Riemenschneider M, Kurz A, Scherag A, Egensperger R. The Cathepsin D (224C/T) Polymorphism Confers an Increased Risk to Develop Alzheimer's Disease in Men. *The Journals of Gerontology Series A: Biological Sciences and Medical Sciences*. 2010 March 1, 2010;65A(3):219-24.
37. Yaspan BL, Breyer JP, Cai Q, Dai Q, Elmore JB, Amundson I, et al. Haplotype Analysis of CYP11A1 Identifies Promoter Variants Associated with Breast Cancer Risk. *Cancer Research*. 2007 June 15, 2007;67(12):5673-82.
38. Tu Y, Cui G, Xu Y, Bao X, Wang X, Wang D. Genetic polymorphism of CYP11B2 gene and stroke in the Han Chinese population and a meta-analysis. *Pharmacogenet Genomics*. 2011;21(3):115-20.
39. White PC, Hautanen A, Kupari M. Aldosterone synthase (CYP11B2) polymorphisms and cardiovascular function. *J Steroid Biochem Mol Biol*. 1999;69(1-6):409-12.
40. Brookes K, Xu X, Chen W, Zhou K, Neale B, Lowe N, et al. The analysis of 51 genes in DSM-IV combined type attention deficit hyperactivity disorder: association signals in DRD4, DAT1 and 16 other genes. *Mol Psychiatry*. 2006;11(10):934-53.
41. Le Strat Y, Ramoz N, Pickering P, Burger V, Boni C, Aubin H-J, et al. The 3' Part of the Dopamine Transporter Gene DAT1/SLC6A3 Is Associated With Withdrawal Seizures in Patients With Alcohol Dependence. *Alcoholism: Clinical and Experimental Research*. 2008;32(1):27-35.
42. Callicott JH, Straub RE, Pezawas L, Egan MF, Mattay VS, Hariri AR, et al. Variation in DISC1 affects hippocampal structure and function and increases risk for schizophrenia. *Proc Natl Acad Sci U S A*. 2005;102(24):8627-32.
43. Thomson PA, Harris SE, Starr JM, Whalley LJ, Porteous DJ, Deary IJ. Association between genotype at an exonic SNP in DISC1 and normal cognitive aging. *Neuroscience Letters*. 2005;389(1):41-5.
44. Blum K, Braverman ER, Wood RC, Gill J, Li C, Chen TJ, et al. Increased prevalence of the Taq I A1 allele of the dopamine receptor gene (DRD2) in obesity with comorbid substance use disorder: a preliminary report. *Pharmacogenetics*. 1996 Aug;6(4):297-305.
45. Dubertret C, Bardel C, Ramoz N, Martin P-M, Deybach J-C, Adès J, et al. A genetic schizophrenia-susceptibility region located between the ANKK1 and DRD2 genes. *Progress in Neuro-Psychopharmacology and Biological Psychiatry*. 2010;34(3):492-9.
46. Monakhov M, Golimbet V, Abramova L, Kaleda V, Karpov V. Association study of three polymorphisms in the dopamine D2 receptor gene and schizophrenia in the Russian population. *Schizophrenia Research*. 2008;100(1–3):302-7.

47. Voisey J, Swagell CD, Hughes IP, Morris CP, van Daal A, Noble EP, et al. The DRD2 gene 957C>T polymorphism is associated with Posttraumatic Stress Disorder in war veterans. *Depression and Anxiety*. 2009;26(1):28-33.
48. Yang J-W, Jang W-S, Hong SD, Ji YI, Kim DH, Park J, et al. A case-control association study of the polymorphism at the promoter region of the DRD4 gene in Korean boys with attention deficit-hyperactivity disorder: Evidence of association with the - 521 C/T SNP. *Progress in Neuro-Psychopharmacology and Biological Psychiatry*. 2008;32(1):243-8.
49. Lai JH, Zhu YS, Huo ZH, Sun RF, Yu B, Wang YP, et al. Association study of polymorphisms in the promoter region of DRD4 with schizophrenia, depression, and heroin addiction. *Brain Research*. 2010;1359:227-32.
50. Funke B, Finn CT, Plocik AM, Lake S, DeRosse P, Kane JM, et al. Association of the DTNBP1 Locus with Schizophrenia in a U.S. Population. *The American Journal of Human Genetics*. 2004;75(5):891-8.
51. Burdick KE, Lencz T, Funke B, Finn CT, Szeszko PR, Kane JM, et al. Genetic variation in DTNBP1 influences general cognitive ability. *Human Molecular Genetics*. 2006 15 May 2006;15(10):1563-8.
52. Riley B, Kuo P-H, Maher BS, Fanous AH, Sun J, Wormley B, et al. The dystrobrevin binding protein 1 (DTNBP1) gene is associated with schizophrenia in the Irish Case Control Study of Schizophrenia (ICCS) sample. *Schizophrenia Research*. 2009;115(2-3):245-53.
53. Caspi A, Williams B, Kim-Cohen J, Craig IW, Milne BJ, Poulton R, et al. Moderation of breastfeeding effects on the IQ by genetic variation in fatty acid metabolism. *Proc Natl Acad Sci U S A*. 2007 Nov 20;104(47):18860-5.
54. Binder H, Dittrich R, Hager I, Muller A, Oeser S, Beckmann MW, et al. Association of FSH receptor and CYP19A1 gene variations with sterility and ovarian hyperstimulation syndrome. *Reproduction*. 2008;135(1):107-16.
55. Rendina D, Gianfrancesco F, De Filippo G, Merlotti D, Esposito T, Mingione A, et al. FSHR gene polymorphisms influence bone mineral density and bone turnover in postmenopausal women. *Eur J Endocrinol*. 2010;163(1):165-72.
56. Dina C, Meyre D, Gallina S, Durand E, Korner A, Jacobson P, et al. Variation in FTO contributes to childhood obesity and severe adult obesity. *Nat Genet*. 2007;39(6):724-6.
57. Tung Y-CL, Yeo GSH. From GWAS to biology: lessons from FTO. *Annals of the New York Academy of Sciences*. 2011;1220(1):162-71.
58. Chabris C, Hebert B, Benjamin D, Beauchamp J, Cesarini D, van der Loos M, et al. Most reported genetic associations with general intelligence are probably false positives. *Psychological Science*. 2011;In press.
59. Kivimaki M, Jokela M, Hamer M, Geddes J, Ebmeier K, Kumari M, et al. Examining Overweight and Obesity as Risk Factors for Common Mental Disorders Using Fat Mass and Obesity-Associated (FTO) Genotype-Instrumented Analysis. *Am J Epidemiol*. 2011 Feb 15;173(4):421-9.
60. Beuten J, Ma JZ, Payne TJ, Dupont RT, Crews KM, Somes G, et al. Single- and Multilocus Allelic Variants within the GABAB Receptor Subunit 2 (GABAB2) Gene Are Significantly Associated with Nicotine Dependence. *The American Journal of Human Genetics*. 2005;76(5):859-64.
61. Wilson AC. Investigations into gonadotropin-releasing hormone receptor signaling in extrahypothalamic neurons of the brain: Implications for normal cognition and the pathogenesis of Alzheimer's disease: Thesis. University of Wisconsin, Madison, USA; 2009.
62. Eiberg H, Troelsen J, Nielsen M, Mikkelsen A, Mengel-From J, Kjaer K, et al. Blue eye color in humans may be caused by a perfectly associated founder mutation in a regulatory element located within the HERC2 gene inhibiting OCA2 expression. *Human Genetics*. 2008;123(2):177-87.

63. Sturm RA, Duffy DL, Zhao ZZ, Leite FPN, Stark MS, Hayward Nicholas K, et al. A Single SNP in an Evolutionary Conserved Region within Intron 86 of the HERC2 Gene Determines Human Blue-Brown Eye Color. *The American Journal of Human Genetics*. 2008;82(2):424-31.
64. Beutler E. The significance of the 187G (H63D) mutation in hemochromatosis. *Am J Hum Genet*. 1997 Sep;61(3):762-4.
65. Sun T, Oh WK, Jacobus S, Regan M, Pomerantz M, Freedman ML, et al. The Impact of Common Genetic Variations in Genes of the Sex Hormone Metabolic Pathways on Steroid Hormone Levels and Prostate Cancer Aggressiveness. *Cancer Prevention Research*. 2011 December 1, 2011;4(12):2044-50.
66. Crandall CJ, Crawford SL, Gold EB. Vasomotor Symptom Prevalence Is Associated with Polymorphisms in Sex Steroid-Metabolizing Enzymes and Receptors. *The American Journal of Medicine*. 2006;119(9, Supplement 1):S52-S60.
67. Kravitz HM, Meyer PM, Seeman TE, Greendale GA, Sowers MR. Cognitive Functioning and Sex Steroid Hormone Gene Polymorphisms in Women at Midlife. *The American Journal of Medicine*. 2006;119(9, Supplement 1):S94-S102.
68. Brezo J, Bureau A, Merette C, Jomphe V, Barker ED, Vitaro F, et al. Differences and similarities in the serotonergic diathesis for suicide attempts and mood disorders: a 22-year longitudinal gene-environment study. *Mol Psychiatry*. 2010;15(8):831-43.
69. Wilkie MJV, Smith G, Day RK, Matthews K, Smith D, Blackwood D, et al. Polymorphisms in the SLC6A4 and HTR2A genes influence treatment outcome following antidepressant therapy. *Pharmacogenomics J*. 2008;9(1):61-70.
70. McAuley EZ, Fullerton JM, Blair IP, Donald JA, Mitchell PB, Schofield PR. Association between the serotonin 2A receptor gene and bipolar affective disorder in an Australian cohort. *Psychiatr Genet*. 2009 Oct;19(5):244-52.
71. McMahon FJ, Buervenich S, Charney D, Lipsky R, Rush AJ, Wilson AF, et al. Variation in the Gene Encoding the Serotonin 2A Receptor Is Associated with Outcome of Antidepressant Treatment. *The American Journal of Human Genetics*. 2006;78(5):804-14.
72. Mazza M, Mandelli L, Martinotti G, Di Nicola M, Tavian D, Negri G, et al. Further evidence supporting the association between 5HT2C gene and bipolar disorder. *Psychiatry Res*. 2010 Dec 30;180(2-3):151-2.
73. Lerer B, Macciardi F, Segman RH, Adolfsson R, Blackwood D, Blairy S, et al. Variability of 5-HT2C receptor cys23ser polymorphism among European populations and vulnerability to affective disorder. *Mol Psychiatry*. 2001 Sep;6(5):579-85.
74. Lin E, Chen PS, Chang HH, Gean P-W, Tsai HC, Yang YK, et al. Interaction of serotonin-related genes affects short-term antidepressant response in major depressive disorder. *Progress in Neuro-Psychopharmacology and Biological Psychiatry*. 2009;33(7):1167-72.
75. Su S, Zhao J, Bremner JD, Miller AH, Tang W, Bouzyk M, et al. Serotonin Transporter Gene, Depressive Symptoms, and Interleukin-6 / CLINICAL PERSPECTIVE. *Circulation: Cardiovascular Genetics*. 2009 December 1, 2009;2(6):614-20.
76. Mfuna Endam L, Cormier C, Bosse Y, Filali-Mouhim A, Desrosiers M. Association of IL1A, IL1B, and TNF Gene Polymorphisms With Chronic Rhinosinusitis With and Without Nasal Polyposis: A Replication Study. *Arch Otolaryngol Head Neck Surg*. 2010 February 1, 2010;136(2):187-92.
77. Um J-Y, Rim H-K, Kim S-J, Kim H-L, Hong S-H. Functional Polymorphism of IL-1 Alpha and Its Potential Role in Obesity in Humans and Mice. *PLoS ONE*. 2011;6(12):e29524.
78. Fishman D, Faulds G, Jeffery R, Mohamed-Ali V, Yudkin JS, Humphries S, et al. The effect of novel polymorphisms in the interleukin-6 (IL-6) gene on IL-6 transcription and plasma IL-6 levels, and an association with systemic-onset juvenile chronic arthritis. *The Journal of Clinical Investigation*. 1998;102(7):1369-76.

79. Slattery ML, Curtin K, Sweeney C, Wolff RK, Baumgartner RN, Baumgartner KB, et al. Modifying Effects of IL-6 Polymorphisms on Body Size-Associated Breast Cancer Risk. *Obesity*. 2008;16(2):339-47.
80. Huth C, Heid IM, Vollmert C, Gieger C, Grallert H, Wolford JK, et al. IL6 Gene Promoter Polymorphisms and Type 2 Diabetes. *Diabetes*. 2006 October 2006;55(10):2915-21.
81. Bull SJ, Huezo-Diaz P, Binder EB, Cubells JF, Ranjith G, Maddock C, et al. Functional polymorphisms in the interleukin-6 and serotonin transporter genes, and depression and fatigue induced by interferon-alpha and ribavirin treatment. *Mol Psychiatry*. 2009 Dec;14(12):1095-104.
82. Purdue MP, Graubard BI, Chanock SJ, Rubertone MV, Erickson RL, McGlynn KA. Genetic Variation in the Inhibin Pathway and Risk of Testicular Germ Cell Tumors. *Cancer Research*. 2008 April 15, 2008;68(8):3043-8.
83. Rodríguez-Rodríguez E, Infante J, Llorca J, Mateo I, Sánchez-Quintana C, García-Gorostiaga I, et al. Age-dependent association of KIBRA genetic variation and Alzheimer's disease risk. *Neurobiology of Aging*. 2009;30(2):322-4.
84. Almeida OP, Schwab SG, Lautenschlager NT, Morar B, Greenop KR, Flicker L, et al. KIBRA genetic polymorphism influences episodic memory in later life, but does not increase the risk of mild cognitive impairment. *Journal of Cellular and Molecular Medicine*. 2008;12(5a):1672-6.
85. Salopuro T, Pulkkinen L, Lindstrom J, Eriksson JG, Valle TT, Hamalainen H, et al. Genetic variation in leptin receptor gene is associated with type 2 diabetes and body weight: The Finnish Diabetes Prevention Study. *Int J Obes Relat Metab Disord*. 2005;29(10):1245-51.
86. Saukko M, Kesaniemi YA, Ukkola O. Leptin receptor Lys109Arg and Gln223Arg polymorphisms are associated with early atherosclerosis. *Metab Syndr Relat Disord*. 2010;8(5):425-30.
87. Haasl R, Ahmadi MR, Meethal S, Gleason C, Johnson S, Asthana S, et al. A luteinizing hormone receptor intronic variant is significantly associated with decreased risk of Alzheimer's disease in males carrying an apolipoprotein E epsilon4 allele. *BMC Medical Genetics*. 2008;9(1):37.
88. Kim H, Lee H, Rowan J, Brahim J, Dionne R. Genetic polymorphisms in monoamine neurotransmitter systems show only weak association with acute post-surgical pain in humans. *Molecular Pain*. 2006;2(1):24.
89. Lerer E, Levi S, Salomon S, Darvasi A, Yirmiya N, Ebstein RP. Association between the oxytocin receptor (OXTR) gene and autism: relationship to Vineland Adaptive Behavior Scales and cognition. *Mol Psychiatry*. 2007;13(10):980-8.
90. Liu X, Kawamura Y, Shimada T, Otowa T, Koishi S, Sugiyama T, et al. Association of the oxytocin receptor (OXTR) gene polymorphisms with autism spectrum disorder (ASD) in the Japanese population. *J Hum Genet*. 2010;55(3):137-41.
91. Lucht MJ, Barnow S, Sonnenfeld C, Rosenberger A, Grabe HJ, Schroeder W, et al. Associations between the oxytocin receptor gene (OXTR) and affect, loneliness and intelligence in normal subjects. *Progress in Neuro-Psychopharmacology and Biological Psychiatry*. 2009;33(5):860-6.
92. Thompson RJ, Parker KJ, Hallmayer JF, Waugh CE, Gotlib IH. Oxytocin receptor gene polymorphism (rs2254298) interacts with familial risk for psychopathology to predict symptoms of depression and anxiety in adolescent girls. *Psychoneuroendocrinology*. 2011;36(1):144-7.
93. Dong Y, Zhang H, Wang X, Feng Q, Chen X, Su Q. A Leu184Val polymorphism in PCK1 gene is associated with type 2 diabetes in Eastern Chinese population with BMI < 23 kg/m<sup>2</sup>. *Diabetes Research and Clinical Practice*. 2009;83(2):227-32.
94. Pearce CL, Hirschhorn JN, Wu AH, Burt NP, Stram DO, Young S, et al. Clarifying the PROGINS Allele Association in Ovarian and Breast Cancer Risk: A Haplotype-Based Analysis. *Journal of the National Cancer Institute*. 2005 January 5, 2005;97(1):51-9.



95. Joshi G, Pradhan S, Mittal B. Role of the oestrogen receptor (ESR1 PvuII and ESR1 325 C→G) and progesterone receptor (PROGINS) polymorphisms in genetic susceptibility to migraine in a North Indian population. *Cephalalgia*. 2010 March 1, 2010;30(3):311-20.
96. Taylor KC, Small CM, Epstein MP, Sherman SL, Tang W, Wilson MM, et al. Associations of Progesterone Receptor Polymorphisms with Age at Menarche and Menstrual Cycle Length. *Hormone Research in Paediatrics*. 2010;74(6):421-7.
97. Su MT, Lee IW, Chen YC, Kuo PL. Association of progesterone receptor polymorphism with idiopathic recurrent pregnancy loss in Taiwanese Han population. *J Assist Reprod Genet*. 2011 Mar;28(3):239-43.
98. Gosso MF, de Geus EJC, van Belzen MJ, Polderman TJC, Heutink P, Boomsma DI, et al. The SNAP-25 gene is associated with cognitive ability: evidence from a family-based study in two independent Dutch cohorts. *Mol Psychiatry*. 2006;11(9):878-86.
99. Gosso MF, De Geus EJC, Polderman TJC, Boomsma DI, Heutink P, Posthuma D. Common variants underlying cognitive ability: further evidence for association between the SNAP-25 gene and cognition using a family-based study in two independent Dutch cohorts. *Genes, Brain and Behavior*. 2008;7(3):355-64.
100. Zhang Q, Yu J-T, Wang P, Chen W, Wu Z-C, Jiang H, et al. Mitochondrial transcription factor A (TFAM) polymorphisms and risk of late-onset Alzheimer's disease in Han Chinese. *Brain Research*. 2011;1368(0):355-60.
101. Gaweda-Walerych K, Safranow K, Maruszak A, Bialecka M, Klodowska-Duda G, Czyzewski K, et al. Mitochondrial transcription factor A variants and the risk of Parkinson's disease. *Neuroscience Letters*. 2010;469(1):24-9.
102. Nielsen DA, Barral S, Proudnikov D, Kellogg S, Ho A, Ott J, et al. TPH2 and TPH1: association of variants and interactions with heroin addiction. *Behav Genet*. 2008 Mar;38(2):133-50.
103. Cichon S, Winge I, Mattheisen M, Georgi A, Karpushova A, Freudenberg J, et al. Brain-specific tryptophan hydroxylase 2 (TPH2): a functional Pro206Ser substitution and variation in the 5'-region are associated with bipolar affective disorder. *Human Molecular Genetics*. 2008 January 1, 2008;17(1):87-97.
104. Goenjian AK, Bailey JN, Walling DP, Steinberg AM, Schmidt D, Dandekar U, et al. Association of TPH1, TPH2, and 5HTTLPR with PTSD and depressive symptoms. *Journal of Affective Disorders*. 2012(in Press).
