# Supplementary material for: Multigene interactions and the prediction of depression in the Wisconsin Longitudinal Study
Source: PubMed Central journal article supplement — BMJ Open. 2012 Jul 2;2(4):e000944. doi: 10.1136/bmjopen-2012-000944 (PMC3391375; doi:10.1136/bmjopen-2012-000944), 2012-07-02
Supplement: bmjopen-2012-000944.draft_revisions.pdf [file bmjopen-2012-000944.draft_revisions.pdf]

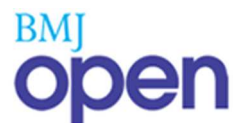

## Multi-Gene Interactions and the Prediction of Depression in the Wisconsin Longitudinal Study

|                                 |                                                                                                                                                                                                                                                                                                                                                                                |
|---------------------------------|--------------------------------------------------------------------------------------------------------------------------------------------------------------------------------------------------------------------------------------------------------------------------------------------------------------------------------------------------------------------------------|
| Journal:                        | <i>BMJ Open</i>                                                                                                                                                                                                                                                                                                                                                                |
| Manuscript ID:                  | bmjopen-2012-000944                                                                                                                                                                                                                                                                                                                                                            |
| Article Type:                   | Research                                                                                                                                                                                                                                                                                                                                                                       |
| Date Submitted by the Author:   | 26-Jan-2012                                                                                                                                                                                                                                                                                                                                                                    |
| Complete List of Authors:       | Roetker, Nicholas; UW-Madison, Sociology<br>Yonker, James; UW-Madison, Sociology<br>Lee, Chee; UW-Madison, Sociology<br>Chang, Vicky; UW-Madison, Sociology<br>Basson, Jacob; UW-Madison, Medicine<br>Roan, Carol; UW-Madison, Sociology<br>Hauser, Taissa; UW-Madison, Sociology<br>Hauser, Robert; UW-Madison, Sociology<br>Atwood, Craig; University of Wisconsin, Medicine |
| <b>Primary Subject Heading</b>: | Mental health                                                                                                                                                                                                                                                                                                                                                                  |
| Secondary Subject Heading:      | Epidemiology, Mental health, Neurology, Genetics and genomics, Public health                                                                                                                                                                                                                                                                                                   |
| Keywords:                       | EPIDEMIOLOGY, MENTAL HEALTH, Neurogenetics < NEUROLOGY, Anxiety disorders < PSYCHIATRY, Depression & mood disorders < PSYCHIATRY                                                                                                                                                                                                                                               |
|                                 |                                                                                                                                                                                                                                                                                                                                                                                |

SCHOLARONE™  
Manuscripts

Only

# Multi-Gene Interactions and the Prediction of Depression in the Wisconsin Longitudinal Study

Nicholas S. Roetker<sup>1</sup>, James A. Yonker<sup>1</sup>, Chee Lee<sup>1</sup>, Vicky Chang<sup>1</sup>, Jacob Basson<sup>2</sup>, Carol L. Roan<sup>1</sup>,  
Taissa S. Hauser<sup>1</sup>, Robert M. Hauser<sup>1</sup> and Craig S. Atwood<sup>2,3</sup>.

<sup>1</sup>Department of Sociology, University of Wisconsin-Madison, Madison, WI 53706, USA.

<sup>2</sup>Geriatric Research, Education and Clinical Center, Veterans Administration Hospital and Department of  
Medicine, University of Wisconsin-Madison School of Medicine and Public Health, Madison, WI 53705,  
USA.

<sup>3</sup>School of Exercise, Biomedical and Health Sciences, Edith Cowan University, Joondalup, 6027 WA,  
Australia.

**Running title:** Gene interactions and depression

**Address Correspondence and Reprint Requests to:**

Craig S. Atwood, Ph.D.  
University of Wisconsin-Madison School of Medicine and Public Health  
Wm S. Middleton Memorial VA (GRECC 11G)  
2500 Overlook Terrace, Madison, WI 53705, USA  
Tel. 608 256-1901, Ext. 11664  
Fax. 608 280-7291  
Email: [csa@medicine.wisc.edu](mailto:csa@medicine.wisc.edu)

## ABSTRACT

**Objectives:** Single genetic loci offer little predictive power for the identification of depression. This study examined whether an analysis of gene-gene interactions of 84 single nucleotide polymorphisms in genes associated with depression and age-related diseases would identify significant interactions with increased predictive power for depression.

**Design:** A retrospective cohort study.

**Setting:** A survey of participants in the Wisconsin Longitudinal Study.

**Participants:** A total of 4,792 persons (2,459 females and 2,333 males) who provided saliva for genotyping; the group comes from a randomly selected sample of Wisconsin high school graduates from the class of 1957 as well as a randomly selected sibling, almost all of whom are non-Hispanic white.

**Primary outcome measure:** Depression as determined by the Composite International Diagnostic Interview short-form (CIDI-SF).

**Results:** Using a classification tree approach (recursive partitioning (RP)) we identified a number of candidate gene-gene interactions associated with depression. The primary SNP splits revealed by RP (*ANKK1* rs1800497 in men and *DRD2* rs224592 in women) were found to be significant as single factors by logistic regression (LR) after controlling for multiple testing ( $P=0.001$  for both). Without considering interaction effects, only 1 of the 5 subsequent RP splits reached nominal significance in logistic regression (*FTO* rs1421085 in women;  $P$ -value=0.008). However, after controlling for gene-gene interactions by running logistic regression on RP-specific subsets, every split became significant and grew larger in magnitude (OR [before]→[after]: Men: *GNRH1* novel SNP: [1.43 → 1.57]; Women: *APOC3* rs2854116: [1.28 → 1.56], *ACVR2B* rs3749386: [1.11 → 2.16], *FTO* rs1421085: [1.32 → 1.63], *IL6* rs1800795: [1.12 → 1.85]).

**Conclusions:** Our results suggest that examining gene-gene interactions improves the identification of genetic associations predictive of depression. Four of the SNPs identified in these interactions were located in two pathways well-known to impact depression: neurotransmitter (*ANKK1* and *DRD2*) and

1  
2 neuroendocrine (*GNRH1* and *ACVR2B*) signaling. This study demonstrates the utility of RP analysis as an  
3  
4 efficient and powerful exploratory analysis technique for uncovering genetic and molecular pathway  
5  
6 interactions associated with disease etiology.  
7  
8  
9

## 10 11 12 INTRODUCTION

13  
14 Depression is a widespread mental disorder associated with a host of undesirable health, social, and  
15  
16 economic outcomes. One in six Americans is diagnosed with depression in his or her lifetime (1). While  
17  
18 many environmental factors—such as socioeconomic status, childhood abuse, and major life events—  
19  
20 have important ties with depression, so too does gender and many genetic and epigenetic factors, making  
21  
22 the disorder heterogeneous in nature (2). Another major risk factor for depression is age, with depression  
23  
24 reaching its highest levels in adults over 80 years of age (3).  
25  
26

27  
28 It has been demonstrated from twin studies that genetic factors typically account for 40–70% of the risk  
29  
30 for developing major depressive disorder (MDD), and adoption studies have confirmed the role of genetic  
31  
32 risk factors in the development of MDD (see (4) and references therein). Genetic studies, including recent  
33  
34 genome-wide association studies (GWAS), have identified genetic alterations in over 50 genes known to  
35  
36 be associated with depression (5). However, individually, the genetic alterations found within these genes  
37  
38 (primarily single nucleotide polymorphisms (SNPs)) have little predictive value. There is a similar lack of  
39  
40 predictive value from GWAS of other major age-related diseases (6).  
41  
42

43  
44 Given this lack of predictive power among individual genetic alterations for depression together with  
45  
46 the complex nature of aging-related diseases, it would seem prudent to examine epistatic effects on this  
47  
48 age-related condition. In this respect, we have previously demonstrated that G x G interactions greatly  
49  
50 modulate risk for complex age-related diseases (7, 8). Recent studies of depression also have identified  
51  
52 epistatic effects. In particular, associations have been identified between *BDNF* Val66Met (brain-derived  
53  
54 neurotrophic factor; rs6265) and *5-HTTLPR* (serotonin transporter linked promoter region (9); *GSK3B*  
55  
56 rs6782799 (glycogen synthase kinase 3 $\beta$ ), *BDNF* rs7124442 and *BDNF* Val66Met (10); *BDNF* Val66Met

1  
2 and SNPs in *NTRK2* (neurotrophic tyrosine kinase receptor 2; (11)), and *5-HTTLPR* short allele and a  
3  
4 chromosome 4 gene (12).  
5

6  
7 In this study, we have assessed the epistatic effects of known genetic alterations that link to  
8  
9 depression and age-related diseases in the Wisconsin Longitudinal Study (WLS). Using recursive  
10  
11 partitioning (RP) and logistic regression (LR) we identified associations between dopaminergic genes and  
12  
13 depression in men and women, as well as G x G interactions involving neuroendocrine signaling  
14  
15 pathways, with increased significance compared with single genetic associations.  
16  
17  
18  
19  
20  
21  
22  
23  
24  
25  
26  
27  
28  
29  
30  
31  
32  
33  
34  
35  
36  
37  
38  
39  
40  
41  
42  
43  
44  
45  
46  
47  
48  
49  
50  
51  
52  
53  
54  
55  
56  
57  
58  
59  
60

## METHODS

### Study Participants and Surveys

Data were collected from the WLS, a random sample originally comprised of 10 317 men and women who graduated from Wisconsin high schools in 1957. Later in 1977, the WLS began interviewing one randomly selected sibling of each graduate, when possible. The cohort consists almost entirely of non-Hispanic white persons whose average level of educational attainment was 1.5 years of post-high school education at the time of interview in 2004. Ages of participants in the WLS ranged from 35 to 90 years old at this time, with 83% of participants being between 60 and 70 years old. Further characteristics of the WLS cohort may be found in detail elsewhere (13). Health and psychological well-being phenotypic data was taken from mail and phone surveys given in 2004-2005. Our main measure of depression is based on a variation of the Composite International Diagnostic Interview short-form (CIDI-SF). All participants answered a single stem question: "Have you ever had a time in life lasting two weeks or more when nearly every day you felt sad, blue, depressed, or when you lost interest in most things like work, hobbies, or things you usually liked to do for fun?" Only those who answered YES and whose depression was not always caused by alcohol, drugs, medications, or physical illness were asked further depression symptom questions. Symptom questions asked whether the two week period was accompanied with any weight loss, trouble sleeping, feeling tired, feeling bad upon waking, losing interest, trouble concentrating, or thoughts about death. Those answering YES to 3 or more of these symptom questions were classified as having depression (14).

### Genotyping

7 101 participants (4 569 graduates & 2 532 siblings) provided saliva samples in Oragene DNA sample collection kits from which DNA was extracted and genotyped for 84 SNPs that were selected based on their association with depression and age-related conditions and diseases. Genotyping was performed by KBioscience (Hoddesdon, UK) with use of a homogeneous Fluorescent Resonance Energy Transfer

1  
2  
3 technology coupled to competitive allele specific PCR. All SNP genotypes described in our results were in  
4  
5 Hardy-Weinberg equilibrium and their frequencies matched those reported in the literature for European  
6  
7 samples.

### 10 11 Statistical Analysis

12  
13 Of those participants that provided DNA and that also completed the survey depression questions (4  
14  
15 792), the following analyses were performed:

16  
17  
18  
19  
20 *Recursive Partitioning (RP)*. RP is a data mining tool for revealing trends that relate a dependent  
21  
22 variable (depression incidence) to various predictor variables (SNPs). Zhang and Bonney have shown  
23  
24 how RP can be used in genetic association studies to identify disease genes (15). RP helps control for  
25  
26 heterogeneity in the population and confounding factors by allowing for the segregation of the sample  
27  
28 population according to any condition. Thus, RP is a useful way to handle complex datasets that might  
29  
30 confound regression analysis due to the complexity of the relationship between the independent and  
31  
32 dependent variables and due to missing information.

33  
34  
35 RP classification trees (using R package rpart) were used to identify potential interactions among the  
36  
37 84 SNPs in relation to depression. The trees split the data along branches according to criteria determined  
38  
39 by the rpart package algorithm, which is originally based off the work of Breiman's classification and  
40  
41 regression trees (CART) algorithm (16). Basically, the CART algorithm first considers all depressed and  
42  
43 non-depressed subjects pooled together in a heterogeneous root node. Based on considering every  
44  
45 possible "yes-no" binary partition that can be made by each independent variable, the single split which  
46  
47 maximizes homogeneity between the two resulting sub-nodes as compared to the root node is made.  
48  
49 Each sub-node can then be treated independently as a new root node for all subsequent splits, and the  
50  
51 pattern continues until every subject constitutes a terminal node, resulting in a very large and complex  
52  
53 tree. A 10-part cross validation procedure seeking to minimize misclassification and complexity  
54  
55  
56  
57  
58  
59  
60

1  
2 determines optimal pruning. See Therneau and Atkinson (17) for specific details of the rpart package.  
3  
4 Tree nodes were re-created in Microsoft Visio to display depression incidence (in %) and total number of  
5  
6 participants rather than the default number of controls/cases as presented by rpart.  
7  
8  
9

10  
11 *Logistic Regression (LR).* Variables found in association with depression based on RP analysis were  
12  
13 considered in single factor LR models, separate by gender, using the specific dichotomous splitting of  
14  
15 genotypes as designated by RP trees. Regression models for all seven SNP splits were first run on the full  
16  
17 dataset to represent single main factor effects. Then each split was run on the respective subset of data  
18  
19 as represented by the preceding RP split criteria. Thus, we attempt to mirror RP splits within a more  
20  
21 formal LR framework in order to measure the significance of interactions presented by the trees. Multiple  
22  
23 testing of 84 SNPs in RP for both male and females followed by 14 LR models resulted in a modified FDR  
24  
25 significance level of 0.008.  
26  
27  
28  
29  
30  
31  
32  
33  
34  
35  
36  
37  
38  
39  
40  
41  
42  
43  
44  
45  
46  
47  
48  
49  
50  
51  
52  
53  
54  
55  
56  
57  
58  
59  
60



## RESULTS

Of the 4,792 participants with complete survey information on CIDI-SF depression (2 459 females and 2 333 males), we identified 711 participants (481 females and 230 males) with depression. Given that the independent variable gender (when included as a factor in the full dataset) was the primary split on RP trees; that women are over two times as likely to be diagnosed with depression than men; and since the female etiology of depression has been reported to be associated with unique social, psychological, and biological factors (18), all subsequent analyses were performed by gender.

### Recursive Partition Analysis

To examine multi-gene interactions for association with depression we screened our dataset using RP. The two-factor RP tree (*ANKK1/GNRH1*) was the optimized pruning for men (Fig. 1), while the five-factor tree (*DRD2/APOC3/ACVR2B/FTO/IL6*) was the optimized pruning for women (Fig. 2). The best overall split for men was *ANKK1* rs1800497, where the incidence of depression increased 2.3-fold in those with no C-alleles compared to those with one or two C-alleles. Considering interaction between *ANKK1* and *GNRH1* widened the disparity in incidence, where those with at least one C-allele in both *ANKK1* rs1800497 and the novel SNP in *GNRH1* had a 3-fold lower incidence than those without a C-allele in *ANKK1* rs1800497.

For women, the best overall split was *DRD2* rs2242592, where those with one or two C-alleles had 1.3-fold higher incidence of depression compared to those without any C-alleles. G x G interactions associated with the highest incidence of depression included: *DRD2* rs2242592 T/T + *APOC3* rs45537037 T/T + *ACVR2B* rs3749386 C/C or T/T, accounting for a 1.4-fold increase in depression compared to baseline incidence.

### Single Main-Factor Effects

Specific SNP interactions identified by RP were next analyzed by LR (see Table 1, Full Data). The

1  
2 primary SNP splits in males and females were significant at the modified FDR level. Men with no C-alleles  
3 for *ANKK1* rs1800497 had 2.6 times higher odds [P=0.001 (1.5, 4.6)] of depression compared with men  
4 with at least 1 C-allele. Women with at least 1 C-allele for *DRD2* rs2242592 had 1.3 times higher odds  
5 [P=0.006 (1.1-1.6)] of depression compared with women with no C-alleles. One other split reached  
6 nominal significance; women homozygous (C/C or T/T) for *FTO* rs1421085 had 1.32 times higher odds  
7 [P=0.008 (1.1-1.6)] for depression than women with a heterozygous genotype. SNP splits of *GNRH1*,  
8 *APOC3*, *ACVR2B*, and *IL6* did not significantly associate with depression.  
9  
10  
11  
12  
13  
14  
15  
16  
17  
18  
19

### 20 Gene-Gene Interactions Enhance Predictability for Depression

21 Specific SNP interactions identified by RP were next analyzed by LR as RP-specific subsets (see  
22 Table 1, RP-Subsetted Data). All 5 of the secondary and tertiary RP splits were found to be significant at  
23 the modified FDR level when considered as subsets. Among only men with at least one C-allele in *ANKK1*  
24 rs1800497, those with no C-allele in the novel SNP of *GNRH1* had 1.57 times higher odds [P=0.002 (1.2-  
25 2.1)] for depression than men with 1 or 2 C-alleles. For the subset of women in the first right-hand split of  
26 Fig. 2, those homozygous for *FTO* rs1421085 had 1.63 times higher odds [P=0.0006 (1.2-2.2)] for  
27 depression than women with a heterozygous genotype. For the remaining subset of women in the second  
28 right-hand split of Fig. 2, those homozygous for *IL6* rs1800795 had 1.85 times higher odds [P=0.007 (1.2-  
29 2.9)] for depression than women with a heterozygous genotype. For the subset of women in the first left-  
30 hand split of Fig. 2, those with no C-alleles for *APOC3* rs45537037 had 1.56 times higher odds [P=0.004  
31 (1.2-2.1)] for depression than women with 1 or 2 C-alleles. For the subset of women in the second left-  
32 hand split of Fig. 2, those homozygous for *ACVR2B* rs3749386 had 2.16 times higher odds [P=0.001 (1.4-  
33 3.4)] for depression than women with a heterozygous genotype.  
34  
35  
36  
37  
38  
39  
40  
41  
42  
43  
44  
45  
46  
47  
48  
49  
50  
51  
52  
53  
54  
55  
56  
57  
58  
59  
60

## DISCUSSION

Utilizing RP as a screening tool to find potential multi-gene interactions, followed by verification of multi-gene interactions with LR, our data demonstrate that multi-gene interactions predict depression with a greater certainty than single main factor associations. RP provided us with primary dichotomous genotype splits in men and women (*ANKK1* rs1800497 and *DRD2* rs2242592, respectively) that were both significant in LR models at the modified FDR level (Table 1). Considering the 5 subsequent RP splits in LR over the entire dataset, only 1 reached a nominal level of significance (barely), which was *FTO* rs1421085 in women. However, after running LR on specific subsets of data according to the pattern of RP branches, every split was found to be significant and every odds ratios grew larger (Table 1; P-values [before]→[after]: Male Left: 1.43 → 1.57, Female Left 1: 1.28 → 1.56, Female Left 2: 1.11 → 2.16, Female Right 1: 1.32 → 1.63, Female Right 2: 1.12 → 1.85). Thus, RP provides two unique and important criteria: dichotomous genotype splitting instructions and gene-gene interaction patterns. These criteria go beyond the traditional single factor SNP approach to genetic association studies and allow identification of important multi-gene pathways that more suitably characterize the etiology of complex diseases.

### The Utility of Recursive Partitioning, Multi-factor Dimensionality Reduction and Logistic Regression for Identification of Gene-Gene Interactions

With recent advances in genotyping allowing for high-dimensional SNP identification, it is now possible to examine genetic datasets not only for single main factor effects, but also G x G interactions. The requirement for G x G analyses as a better predictor of age-related diseases is obvious from the standpoint that humans are complex biological systems composed of numerous molecular interactions, and from recent studies indicating disease risk is modulated by G x G interactions (7). Notwithstanding this, the development of analytical tools for the identification of G x G interactions has not kept pace with the technological advances in identifying genetic alterations among individuals. In this respect, we have previously used MDR, LR and LD to identify G x G interactions among a small set of SNPs (7). However,

1  
2  
3 large datasets require a screening tool to identify potential multi-gene interactions. In this study, we have  
4  
5 used RP to screen for multi-gene interactions, a data-mining technique that is currently under-utilized in  
6  
7 genetic studies. RP serves as an efficient and powerful exploratory analysis technique, especially when  
8  
9 looking for interactions in data sets with a large number of independent variables. This screening allows  
10  
11 for the identification of G x G interactions (with greater explanatory power), that might otherwise not have  
12  
13 been identified, and that can then be confirmed using more traditional statistical techniques. As illustrated  
14  
15 in this paper, this data-mining methodology has the advantage of identification of genetic interactions  
16  
17 *between* pathways involved in the etiology of depression, in keeping with the etiological heterogeneity of  
18  
19 this disorder (see later).  
20  
21

22  
23 Our study provides proof of principle for the use of RP in higher-dimensional analyses such as GWAS,  
24  
25 where a comprehensive list of SNPs may fully explore genetic predisposition to depression and other age-  
26  
27 related disease. The WLS is an ideal candidate for future GWAS studies given its large sample size, rich  
28  
29 covariate composition and longitudinal nature.  
30

31  
32 In this genetic study we aimed to identify underlying genetic predispositions to depression and thus  
33  
34 have not yet tested environmental/phenotypic data. Future analyses using RP to examine the impact of  
35  
36 phenotypic and environmental factors on the development of depression would be anticipated to identify  
37  
38 gene-phenotype/environment and multi-phenotype/environment interactions. Indeed, the predictive gains  
39  
40 of G x G analyses were stronger for men than women, despite the fact that depression occurs  
41  
42 disproportionately in women (~2:1 female-to-male; (19-23)). This suggests that environmental factors may  
43  
44 be needed in addition to genetic factors in understanding the etiological pathways for women. Indeed,  
45  
46 biological factors such as hormonal changes related to reproductive status (24, 25) may impact  
47  
48 environmental factors such as psychosocial experiences (trauma, stress, interpersonal relationships, etc)  
49  
50 and general health issues in the development of depression.  
51  
52  
53  
54

## 55 Genetic and Biological Correlates of Depression

56  
57  
58  
59  
60

1  
2  
3 Numerous studies have identified SNPs that associate with depression. Many of the SNPs associated  
4 with depression from other studies were not significantly associated in our study. This is perhaps not  
5 surprising, since a single factor is unlikely to provide consistent association especially in a complex  
6 condition such as depression, where multiple pathways intersect in regulating the risk of the disease. For  
7 example, if a SNP within the serotonin pathway also requires a SNP in the glutamatergic pathway in order  
8 for the patient to present with depression, the presence of either SNP in the absence of the other will not  
9 be predictive of depression. Moreover, as indicated by Shi and Weinberg, since the human genome  
10 contains genetic redundancy, disruption of a single gene may be selectively neutral, but the malfunction of  
11 several genes in a pathway might result in expression of a particular phenotype (26).  
12  
13  
14  
15  
16  
17  
18  
19  
20  
21

22 Both the primary splits in men and women were SNPs linked with *DRD2* (dopamine receptor D2), a  
23 gene that has previously been linked with depression and social phobia (27-29). The primary male  
24 genotype split rs1800497, technically found in gene *ANKK1*, is historically known as the *DRD2* Taq1A  
25 allele because of its known association with decreased dopamine receptor D2 density (in those with T  
26 alleles) (30-33). The Taq1A allele has also been previously associated with depressive symptoms in  
27 children, where those with the A1 allele (T) were more likely to have depressive symptoms (34). We saw a  
28 similar association between A1 and depression in WLS men, where those with two A1 alleles had 2.6  
29 times higher odds for depression compared to those with one or no A1 alleles. The primary split in women  
30 (*DRD2* rs2242592) has previously been found to be associated with schizophrenia, where the C-allele  
31 was associated with higher susceptibility for schizophrenia (35). Interestingly, this same study also found  
32 the Taq1A allele to also associate with schizophrenia.  
33  
34  
35  
36  
37  
38  
39  
40  
41  
42  
43  
44  
45

46 The secondary and tertiary right-hand splits in the female RP tree—*FTO* (fat mass and obesity  
47 associated) rs1421085 and *IL6* (interleukin 6) rs1800795—have also been found to relate with mental  
48 illness and depression in previous studies (36)(37). There is evidence that activin receptor signaling also  
49 is involved in affective disorders, especially when considering interaction with GABAergic pathways (38).  
50 Although we did not see an interaction between SNPs in GABA/activin receptor genes and depression,  
51  
52  
53  
54  
55  
56  
57  
58  
59  
60

1  
2  
3 *ACVR2B* was associated with depression in women. No previous associations between depression and  
4  
5 *APOC3*, *ACVR2B*, or *GNRH1* have been reported.  
6

7  
8 That these genetic variants are associated with *neuroendocrine* pathways (*GnRH1*, *ACVR2B*) that are  
9  
10 known to regulate *neurotransmitter* release and cognitive behavior (39-40) supports these associations as  
11  
12 relevant to the etiology of depression and underlines the benefits of using RP to identify meaningful G x G  
13  
14 interactions associated with disease.  
15

### 16 17 18 Limitations 19

20  
21 Given the numerous genetic, phenotypic and environmental influences that are linked to depression,  
22  
23 and the small number of SNPs analyzed, it is not surprising that predictability from our models was low  
24  
25 (although our predictability was superior to previous studies examining only single main factors). Also, the  
26  
27 predictive value of our statistical models was further limited due to user bias in selection of SNPs (from  
28  
29 nearly two-million SNPs in the human genome) used in this study. As a result of this, interactions we have  
30  
31 found could potentially be moderated by another gene that we have not considered in this study.  
32

33  
34 Nonetheless, we identified significant G x G interactions between known, and newly identified, loci  
35  
36 associated with depression. Importantly, 4 of the 7 SNPs identified in these interactions were primarily  
37  
38 located in two pathways well-known to impact depression: neurotransmitter and neuroendocrine signaling.  
39

40  
41 The results from the RP analyses conducted in this study were confirmed by LR, demonstrating the  
42  
43 utility of RP as a screening tool for identifying meaningful G x G interactions. Future development of  
44  
45 algorithms for RP analysis should not only maximize the distance between branches of the next best split  
46  
47 (i.e. *rpart*), but consider subsequent future split combinations that could potentially result in trees with  
48  
49 “better” overall predictability.  
50

### 51 52 53 Summary 54

55  
56 Our data indicate that G x G interaction analyses allows for enhanced predictability of conditions and  
57  
58  
59  
60

1  
2  
3 diseases of aging. RP is an efficient and powerful exploratory analysis technique for elucidating G x G  
4 interactions in large datasets and combined with LR provides an important statistical analysis for the  
5 identification of well supported G x G interactions. We predict that such analytical methods will play an  
6 increasingly important role in the identification of epistatic effects in future large GWAS. Finally, our  
7 studies illustrate how RP analyses can be used to find interacting pathways involved in the etiology of a  
8 disease or condition such as depression.  
9  
10  
11  
12  
13  
14  
15  
16  
17  
18  
19  
20  
21  
22  
23  
24  
25  
26  
27  
28  
29  
30  
31  
32  
33  
34  
35  
36  
37  
38  
39  
40  
41  
42  
43  
44  
45  
46  
47  
48  
49  
50  
51  
52  
53  
54  
55  
56  
57  
58  
59  
60

## ACKNOWLEDGMENTS

This research uses data from the Wisconsin Longitudinal Study (WLS) of the University of Wisconsin-Madison. Since 1991, the WLS has been supported principally by the National Institute on Aging (AG-9775, AG-21079 and AG-033285), with additional support from the Vilas Estate Trust, the National Science Foundation, the Spencer Foundation, and the Graduate School of the University of Wisconsin-Madison. A public use file of data from the Wisconsin Longitudinal Study is available from the Wisconsin Longitudinal Study, University of Wisconsin-Madison, 1180 Observatory Drive, Madison, Wisconsin 53706 and at <http://www.ssc.wisc.edu/wlsresearch/data/>. This material is the result of work supported with resources at the William S. Middleton Memorial Veterans Hospital, Madison, WI. The opinions expressed herein are those of the authors. The contents do not represent the views of the Dept. of Veterans Affairs or the United States Government.

### Contributorship Statement

CSA, RMH and TSH conceptualized the study. RMH, TSH, CLR, NSR, CL and CSA collected saliva samples and performed genotyping analyses. NSR, JAY, CL, VC and JB performed statistical analyses on the WLS dataset. CSA and RMH directed the statistical analyses. NSR and CSA drafted the manuscript. All authors critically reviewed the manuscript and approved the final version.

### Data Sharing

Genetic and environmental data for the WLS is available online at <http://www.ssc.wisc.edu/wlsresearch/>

### Funding

Supported by the National Institute on Aging, grant numbers AG-9775, AG-21079 and AG-033285

### Competing Interests

None



## FIGURE LEGENDS

**Figure 1.** Recursive Partitioning Tree of CIDI-SF Depression in Males of the WLS. Upper and lower numbers in nodes represent the proportion of participants with depression and the number of participants in that node, respectively. Blue and purple boxes/circles indicate lower and higher rates of depression relative to the primary node, respectively. Split information indicates gene, SNP, and genotype criteria, respectively. M1 is subset of data referenced in Table 1. Sensitivity: 0.526, Specificity: 0.598, Accuracy: 0.591.

**Figure 2.** Recursive Partitioning Tree of CIDI-SF Depression in Females of the WLS. Upper and lower numbers in nodes represent the proportion of participants with depression and the number of participants in that node, respectively. Blue and purple boxes/circles indicate lower and higher rates of depression relative to the primary node, respectively. Split information indicates gene, SNP, and genotype criteria, respectively. F1-F4 are subsets referenced in Table 1. Sensitivity: 0.615, Specificity: 0.549, Accuracy: 0.562.

1  
2  
3  
4  
5  
6  
7  
8  
9  
10  
11  
12  
13  
14  
15  
16  
17  
18  
19  
20  
21  
22  
23  
24  
25  
26  
27  
28  
29  
30  
31  
32  
33  
34  
35  
36  
37  
38  
39  
40  
41  
42  
43  
44  
45  
46  
47  
48  
49  
50  
51  
52  
53  
54  
55  
56  
57  
58  
59  
60

For peer review only

**Table 1.**

Single-factor logistic regression models based directly off male and female RP tree split criteria (see Figures 1 & 2). Each SNP split was first run on the full dataset to represent single main factor effects ("Full Data") for both males and females. Then the same SNP splits were run on specific subsets of data per RP tree splits (M1, F1-F4; "RP-Subsetted Data").

| Gender | RP Split | Gene          | SNP       | Genotypes         | Full Data        |         | RP-Subsetted Data |                  |          |
|--------|----------|---------------|-----------|-------------------|------------------|---------|-------------------|------------------|----------|
|        |          |               |           |                   | OR (95% CI)      | P-value | Subset            | OR (95% CI)      | P-value  |
| Male   | Primary  | <i>ANKK1</i>  | rs1800497 | T/T vs. C/C + C/T | 2.60 (1.47-4.61) | 0.001 * | --                | ----             | ----     |
|        | Left     | <i>GNRH1</i>  | novel SNP | T/T vs. C/C + T/C | 1.43 (1.08-1.88) | 0.011   | M1                | 1.57 (1.18-2.09) | 0.002 *  |
| Female | Primary  | <i>DRD2</i>   | rs2242592 | C/C + T/C vs. T/T | 1.33 (1.09-1.62) | 0.001 * | --                | ----             | ----     |
|        | Left 1   | <i>APOC3</i>  | rs2854116 | T/T vs. C/C + T/C | 1.28 (1.05-1.57) | 0.017   | F1                | 1.56 (1.16-2.10) | 0.004 *  |
|        | Left 2   | <i>ACVR2B</i> | rs3749386 | C/C + T/T vs. T/C | 1.11 (0.91-1.36) | 0.302   | F2                | 2.16 (1.36-3.42) | 0.001 *  |
|        | Right 1  | <i>FTO</i>    | rs1421085 | C/C + T/T vs. T/C | 1.32 (1.07-1.61) | 0.008 * | F3                | 1.63 (1.23-2.17) | 0.0006 * |
|        | Right 2  | <i>IL6</i>    | rs1800795 | C/C + G/G vs. C/G | 1.12 (0.91-1.36) | 0.283   | F4                | 1.85 (1.18-2.88) | 0.007 *  |

RP, recursive partitioning; OR, odds ratio; CI, confidence interval

M1: LR analysis was run for only those with genotype *DRD2* rs1800497 C/C or C/T

F1: LR analysis was run for only those with genotype *DRD2* rs2242592 T/T

F2: LR analysis was run for only those with genotypes *DRD2* rs2242592 T/T and *APOC3* rs2854116 T/T

F3: LR analysis was run for only those with genotype *DRD2* rs2242592 C/C or T/C

F4: LR analysis was run for only those with genotypes *DRD2* rs2242592 C/C or T/C and *FTO* rs1421085 T/C

1  
2  
3  
4  
5  
6  
7  
8  
9  
10  
11  
12  
13  
14  
15  
16  
17  
18  
19  
20  
21  
22  
23  
24  
25  
26  
27  
28  
29  
30  
31  
32  
33  
34  
35  
36  
37  
38  
39  
40  
41  
42  
43  
44  
45  
46  
47  
48  
49

For peer review only

**REFERENCES**

1. CDC. Anxiety and Depression. Atlanta, GA: Centers for Disease Control and Prevention; 2009 [cited 2010 Oct. 18]; Available from: <http://www.cdc.gov/Features/dsBRFSSDepressionAnxiety/>.
2. Eley TC, Sugden K, Corsico A, et al. Gene-environment interaction analysis of serotonin system markers with adolescent depression. *Mol Psychiatry*. 2004;9(10):908-15.
3. Mirowsky J, Ross CE. Age and Depression. *Journal of Health and Social Behavior*. 1992;33(3):187-205.
4. Zubenko GS, Zubenko WN, Spiker DG, et al. Malignancy of recurrent, early-onset major depression: a family study. *Am J Med Genet*. 2001 Dec 8;105(8):690-9.
5. Raymer KA, Waters RF, Price CR. Proposed multigenic Composite Inheritance in major depression. *Medical Hypotheses*. 2005;65(1):158-72.
6. Harold D, Abraham R, Hollingworth P, et al. Genome-wide association study identifies variants at CLU and PICALM associated with Alzheimer's disease. *Nat Genet*. 2009 Oct;41(10):1088-93.
7. Haasl R, Ahmadi MR, Meethal S, et al. A luteinizing hormone receptor intronic variant is significantly associated with decreased risk of Alzheimer's disease in males carrying an apolipoprotein E epsilon4 allele. *BMC Medical Genetics*. 2008;9(1):37.
8. Basson J, Wilson A, Haasl R, et al. Multi locus interactions in steroidogenic pathway genes predict Alzheimer's disease. *Alzheimer's and Dementia*. 2008;4(4 (Suppl. 2)):T579: P3-199.
9. Pezawas L, Meyer-Lindenberg A, Goldman AL, et al. Evidence of biologic epistasis between BDNF and SLC6A4 and implications for depression. *Mol Psychiatry*. 2008;13(7):709-16.
10. Zhang K, Yang C, Xu Y, et al. Genetic association of the interaction between the BDNF and GSK3B genes and major depressive disorder in a Chinese population. *Journal of Neural Transmission*. 2010;117(3):393-401.

- 1  
2  
3 11. Lin E, Hong CJ, Hwang JP, et al. Gene-gene interactions of the brain-derived neurotrophic-factor  
4 and neurotrophic tyrosine kinase receptor 2 genes in geriatric depression. Rejuvenation Res.  
5  
6 2009;12(6):387-93.  
7
- 8  
9  
10 12. Neff CD, Abkevich V, Potter J, et al . Evidence for epistasis between SLC6A4 and a chromosome 4  
11 gene as risk factors in major depression. American Journal of Medical Genetics Part B: Neuropsychiatric  
12 Genetics. 2010;153B(1):321-2.  
13  
14
- 15  
16  
17 13. Sewell WH. As We Age : The Wisconsin Longitudinal Study, 1957-2001: Center for Demography  
18 and Ecology University of Wisconsin--Madison; 2001.  
19
- 20  
21  
22 14. Nelson CB, Kessler RC, Mroczek D. Scoring the World Health Organization's Composite  
23 International Diagnostic Interview Short Form (CIDI-SF; v1.0 NOV98). 1998.  
24  
25
- 26  
27  
28 15. Zhang H, Bonney G. Use of classification trees for association studies. Genet Epidemiol. 2000  
29 Dec;19(4):323-32.  
30
- 31  
32  
33 16. Breiman L, Friedman J, Olshen R, et al. Classification and Regression Trees. Boca Raton:  
34 Chapman and Hall/CRC; 1984.  
35
- 36  
37  
38 17. Therneau T, Atkinson E, editors. Technical Report Series No. 61, An Introduction to Recursive  
39 Partitioning Using the RPART Routines. Rochester, MN: Department of Health Science Research, Mayo  
40 Clinic; 1997.  
41
- 42  
43  
44 18. Accortt EE, Freeman MP, Allen JJB. Women and Major Depressive Disorder: Clinical Perspectives  
45 on Causal Pathways. Journal of Women's Health. 2008;17(10):1583-90.  
46
- 47  
48  
49 19. Kessler RC, McGonagle KA, Swartz M, et al. Sex and depression in the National Comorbidity  
50 Survey. I: Lifetime prevalence, chronicity and recurrence. J Affect Disord. 1993 Oct-Nov;29(2-3):85-96.  
51
- 52  
53  
54 20. Kessler RC, McGonagle KA, Nelson CB, et al. Sex and depression in the National Comorbidity  
55 Survey. II: Cohort effects. J Affect Disord. 1994 Jan;30(1):15-26.  
56  
57  
58  
59  
60

- 1  
2  
3 21. Kessler RC, McGonagle KA, Zhao S, et al. Lifetime and 12-month prevalence of DSM-III-R  
4 psychiatric disorders in the United States. Results from the National Comorbidity Survey. Arch Gen  
5 Psychiatry. 1994 Jan;51(1):8-19.  
6  
7
- 8  
9  
10 22. Weissman MM, Bland R, Joyce PR, et al. Sex differences in rates of depression: cross-national  
11 perspectives. J Affect Disord. 1993 Oct-Nov;29(2-3):77-84.  
12  
13
- 14 23. Weissman MM, Olfson M. Depression in women: implications for health care research. Science.  
15 1995 Aug 11;269(5225):799-801.  
16  
17
- 18 24. Pajer K. New strategies in the treatment of depression in women. The Journal of clinical  
19 psychiatry. [Review]. 1995;56 Suppl 2:30-7.  
20  
21
- 22 25. Paykel ES. Depression in women. Br J Psychiatry Suppl. [Review]. 1991 May(10):22-9.  
23  
24
- 25 26. Shi M, Weinberg CR. How Much Are We Missing in SNP-by-SNP Analyses of Genome-wide  
26 Association Studies? Epidemiology. 2011 Nov;22(6):845-7.  
27  
28
- 29 27. Lawford BR, Young R, Noble EP, et al. The D2 dopamine receptor (DRD2) gene is associated with  
30 co-morbid depression, anxiety and social dysfunction in untreated veterans with post-traumatic stress  
31 disorder. European Psychiatry. 2006;21(3):180-5.  
32  
33
- 34 28. Klimek V, Schenck JE, Han H, et al. Dopaminergic abnormalities in amygdaloid nuclei in major  
35 depression: a postmortem study. Biol Psychiatry. 2002 Oct 1;52(7):740-8.  
36  
37
- 38 29. Schneier FR, Liebowitz MR, Abi-Dargham A, et al. Low dopamine D(2) receptor binding potential  
39 in social phobia. Am J Psychiatry. 2000 Mar;157(3):457-9.  
40  
41
- 42 30. Noble EP, Blum K, Ritchie T, et al. Allelic Association of the D2 Dopamine Receptor Gene With  
43 Receptor-Binding Characteristics in Alcoholism or Gene ism. Arch Gen Psychiatry. 1991 July 1,  
44 1991;48(7):648-54.  
45  
46  
47  
48  
49  
50  
51  
52  
53  
54  
55  
56  
57  
58  
59  
60

- 1  
2  
3  
4  
5  
6  
7  
8  
9  
10  
11  
12  
13  
14  
15  
16  
17  
18  
19  
20  
21  
22  
23  
24  
25  
26  
27  
28  
29  
30  
31  
32  
33  
34  
35  
36  
37  
38  
39  
40  
41  
42  
43  
44  
45  
46  
47  
48  
49  
50  
51  
52  
53  
54  
55  
56  
57  
58  
59  
60
31. Thompson J, Thomas N, Singleton A, et al. D2 dopamine receptor gene (DRD2) Taq1 A polymorphism: reduced dopamine D2 receptor binding in the human striatum associated with the A1 allele. *Pharmacogenetics*. 1997 Dec;7(6):479-84.
32. Pohjalainen T, Rinne JO, Nagren K, et al. The A1 allele of the human D2 dopamine receptor gene predicts low D2 receptor availability in healthy volunteers. *Mol Psychiatry*. 1998 May;3(3):256-60.
33. Jonsson EG, Nothen MM, Grunhage F, et al. Polymorphisms in the dopamine D2 receptor gene and their relationships to striatal dopamine receptor density of healthy volunteers. *Mol Psychiatry*. 1999 May;4(3):290-6.
34. Hayden EP, Klein DN, Dougherty LR, et al. The dopamine D2 receptor gene and depressive and anxious symptoms in childhood: associations and evidence for gene-environment correlation and gene-environment interaction. *Psychiatr Genet*. 2010 Dec;20(6):304-10.
35. Dubertret C, Bardel C, Ramoz N, et al. A genetic schizophrenia-susceptibility region located between the ANKK1 and DRD2 genes. *Progress in Neuro-Psychopharmacology and Biological Psychiatry*. 2010;34(3):492-9.
36. Kivimaki M, Jokela M, Hamer M, et al. Examining Overweight and Obesity as Risk Factors for Common Mental Disorders Using Fat Mass and Obesity-Associated (FTO) Genotype-Instrumented Analysis. *Am J Epidemiol*. 2011 Feb 15;173(4):421-9.
37. Bull SJ, Huezio-Diaz P, Binder EB, et al. Functional polymorphisms in the interleukin-6 and serotonin transporter genes, and depression and fatigue induced by interferon-alpha and ribavirin treatment. *Mol Psychiatry*. 2009 Dec;14(12):1095-104.
38. Zheng F, Adelsberger H, Muller MR, Fet al. Activin tunes GABAergic neurotransmission and modulates anxiety-like behavior. *Mol Psychiatry*. 2008;14(3):332-46.



- 1  
2  
3 39. Dong Y, Zhang H, Wang X, et al. A Leu184Val polymorphism in PCK1 gene is associated with type  
4  
5 2 diabetes in Eastern Chinese population with BMI < 23 kg/m<sup>2</sup>. *Diabetes Research and Clinical Practice*.  
6  
7 2009;83(2):227-32.  
8  
9  
10 40. Atwood CS, Meethal SV, Liu T, et al. Dysregulation of the hypothalamic-pituitary-gonadal axis  
11  
12 with menopause and andropause promotes neurodegenerative senescence. *J Neuropathol Exp Neurol*.  
13  
14 2005;64(2):93-103.  
15  
16  
17  
18  
19  
20  
21  
22  
23  
24  
25  
26  
27  
28  
29  
30  
31  
32  
33  
34  
35  
36  
37  
38  
39  
40  
41  
42  
43  
44  
45  
46  
47  
48  
49  
50  
51  
52  
53  
54  
55  
56  
57  
58  
59  
60

1  
2  
3  
4  
5  
6  
7  
8  
9  
10  
11  
12  
13  
14  
15  
16  
17  
18  
19  
20  
21  
22  
23  
24  
25  
26  
27  
28  
29  
30  
31  
32  
33  
34  
35  
36  
37  
38  
39  
40  
41  
42  
43  
44  
45  
46  
47  
48  
49  
50  
51  
52  
53  
54  
55  
56  
57  
58  
59  
60

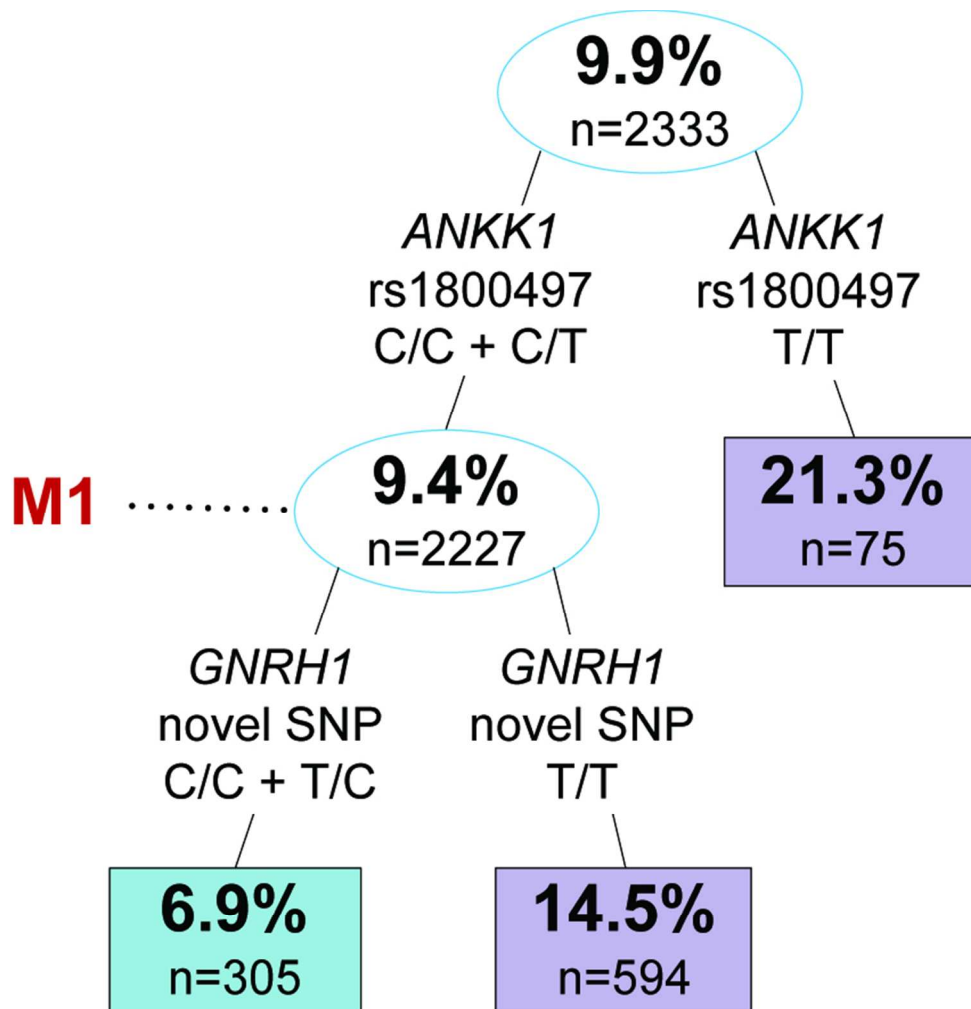

74x74mm (300 x 300 DPI)

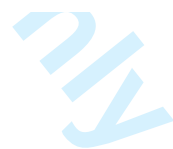

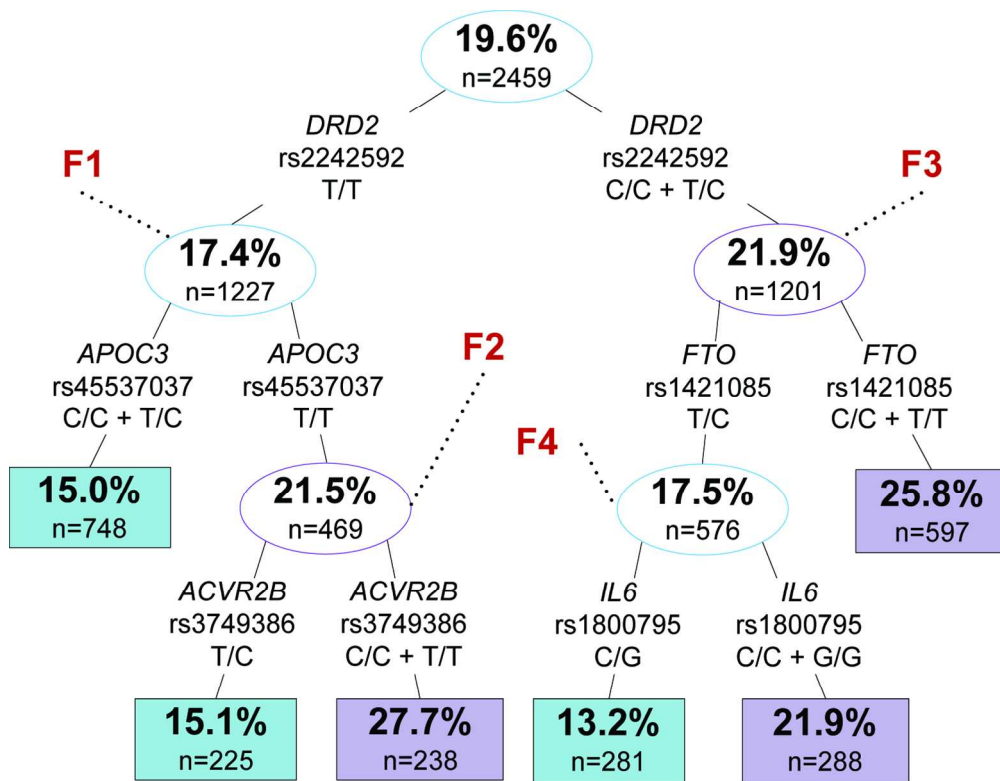

132x102mm (300 x 300 DPI)

1  
2  
3  
4  
5  
6  
7  
8  
9  
10  
11  
12  
13  
14  
15  
16  
17  
18  
19  
20  
21  
22  
23  
24  
25  
26  
27  
28  
29  
30  
31  
32  
33  
34  
35  
36  
37  
38  
39  
40  
41  
42  
43  
44  
45  
46  
47  
48  
49

**Supplementary Table 1. Depression-Associated SNP Identified in the WLS**

| Gene              | SNP       | Name                                                               | Alleles | Chr#/Location      | Residue   | Associated disease/behavior                                                                                       |
|-------------------|-----------|--------------------------------------------------------------------|---------|--------------------|-----------|-------------------------------------------------------------------------------------------------------------------|
| <i>ACVR2B</i>     | rs3749386 | activin receptor IIB                                               | T/C     | 3/intron 1         | --        | left-right axis malformations <sup>1</sup> ; (1)                                                                  |
| <i>APOC3</i>      | rs2854116 | apolipoprotein C-III                                               | T/C     | 11/promoter (-455) | --        | nonalcoholic fatty liver disease, insulin resistance <sup>2</sup>                                                 |
| <i>DRD2/ANKK1</i> | rs1800497 | dopamine receptor D2/ankyrin repeat and kinase domain containing 1 | C/T     | 11/exon (ANKK1)    | Glu713Lys | obesity, drug addiction <sup>3</sup>                                                                              |
| <i>DRD2</i>       | rs2242592 | dopamine receptor D2                                               | T/C     | 11/3'              | --        | Schizophrenia <sup>4</sup>                                                                                        |
| <i>FTO</i>        | rs1421085 | fat mass and obesity associated                                    | T/C     | 16/intron 1        | --        | Obesity <sup>5-7</sup> ; mental disorders (in men) <sup>8</sup>                                                   |
| <i>GNRH1</i>      | novel SNP | gonadotropin-releasing hormone promoter                            | T/C     | 8/promoter         | --        | Alzheimer's disease <sup>9</sup>                                                                                  |
| <i>IL6</i>        | rs1800795 | interleukin 6 (interferon, beta 2)                                 | C/G     | 7/promoter (-174)  | --        | Arthritis <sup>10</sup> , breast cancer <sup>11</sup> ; type II diabetes <sup>12</sup> ; depression <sup>13</sup> |

<sup>1</sup>Gene association only

Peer review only

## References

1. Kosaki R, Gebbia M, Kosaki K, Lewin M, Bowers P, Towbin JA, et al. Left–right axis malformations associated with mutations in ACVR2B, the gene for human activin receptor type IIB. *American Journal of Medical Genetics*. 1999;82(1):70-6.
2. Petersen KF, Dufour S, Hariri A, Nelson-Williams C, Foo JN, Zhang X-M, et al. Apolipoprotein C3 Gene Variants in Nonalcoholic Fatty Liver Disease. *New England Journal of Medicine*. 2010;362(12):1082-9.
3. Blum K, Braverman ER, Wood RC, Gill J, Li C, Chen TJ, et al. Increased prevalence of the Taq I A1 allele of the dopamine receptor gene (DRD2) in obesity with comorbid substance use disorder: a preliminary report. *Pharmacogenetics*. 1996 Aug;6(4):297-305.
4. Dubertret C, Bardel C, Ramoz N, Martin P-M, Deybach J-C, Adès J, et al. A genetic schizophrenia-susceptibility region located between the ANKK1 and DRD2 genes. *Progress in Neuro-Psychopharmacology and Biological Psychiatry*. 2010;34(3):492-9.
5. Dina C, Meyre D, Gallina S, Durand E, Korner A, Jacobson P, et al. Variation in FTO contributes to childhood obesity and severe adult obesity. *Nat Genet*. [10.1038/ng2048]. 2007;39(6):724-6.
6. Tung Y-CL, Yeo GSH. From GWAS to biology: lessons from FTO. *Annals of the New York Academy of Sciences*. 2011;1220(1):162-71.
7. Chabris C, Hebert B, Benjamin D, Beauchamp J, Cesarini D, van der Loos M, et al. Most reported genetic associations with general intelligence are probably false positives. *Psychological Science*. 2011;In press.
8. Kivimaki M, Jokela M, Hamer M, Geddes J, Ebmeier K, Kumari M, et al. Examining Overweight and Obesity as Risk Factors for Common Mental Disorders Using Fat Mass and Obesity-Associated (FTO) Genotype-Instrumented Analysis. *Am J Epidemiol*. 2011 Feb 15;173(4):421-9.

- 1  
2  
3 9. Wilson AC. Investigations into gonadotropin-releasing hormone receptor signaling in  
4  
5  
6 extrahypothalamic neurons of the brain: Implications for normal cognition and the pathogenesis of  
7  
8 Alzheimer's disease: Thesis. University of Wisconsin, Madison, USA; 2009.  
9  
10 10. Fishman D, Faulds G, Jeffery R, Mohamed-Ali V, Yudkin JS, Humphries S, et al. The effect of novel  
11  
12 polymorphisms in the interleukin-6 (IL-6) gene on IL-6 transcription and plasma IL-6 levels, and an  
13  
14 association with systemic-onset juvenile chronic arthritis. *The Journal of Clinical Investigation*.  
15  
16 1998;102(7):1369-76.  
17  
18 11. Slattery ML, Curtin K, Sweeney C, Wolff RK, Baumgartner RN, Baumgartner KB, et al. Modifying  
19  
20 Effects of IL-6 Polymorphisms on Body Size-Associated Breast Cancer Risk. *Obesity*. 2008;16(2):339-47.  
21  
22 12. Huth C, Heid IM, Vollmert C, Gieger C, Grallert H, Wolford JK, et al. IL6 Gene Promoter  
23  
24 Polymorphisms and Type 2 Diabetes. *Diabetes*. 2006 October 2006;55(10):2915-21.  
25  
26 13. Bull SJ, Huezo-Diaz P, Binder EB, Cubells JF, Ranjith G, Maddock C, et al. Functional polymorphisms in  
27  
28 the interleukin-6 and serotonin transporter genes, and depression and fatigue induced by interferon-  
29  
30 alpha and ribavirin treatment. *Mol Psychiatry*. 2009 Dec;14(12):1095-104.  
31  
32  
33  
34  
35  
36  
37  
38  
39  
40  
41  
42  
43  
44  
45  
46  
47  
48  
49  
50  
51  
52  
53  
54  
55  
56  
57  
58  
59  
60

STROBE Statement—Checklist of items that should be included in reports of *cohort studies*

|                              | Item No | Recommendation                                                                                                                                                                                                                                                                                                                                                                                                |
|------------------------------|---------|---------------------------------------------------------------------------------------------------------------------------------------------------------------------------------------------------------------------------------------------------------------------------------------------------------------------------------------------------------------------------------------------------------------|
| <b>Title and abstract</b>    | 1       | (a) Indicate the study's design with a commonly used term in the title or the abstract<br>(b) Provide in the abstract an informative and balanced summary of what was done and what was found                                                                                                                                                                                                                 |
| <b>Introduction</b>          |         |                                                                                                                                                                                                                                                                                                                                                                                                               |
| Background/rationale         | 2       | Explain the scientific background and rationale for the investigation being reported                                                                                                                                                                                                                                                                                                                          |
| Objectives                   | 3       | State specific objectives, including any prespecified hypotheses                                                                                                                                                                                                                                                                                                                                              |
| <b>Methods</b>               |         |                                                                                                                                                                                                                                                                                                                                                                                                               |
| Study design                 | 4       | Present key elements of study design early in the paper                                                                                                                                                                                                                                                                                                                                                       |
| Setting                      | 5       | Describe the setting, locations, and relevant dates, including periods of recruitment, exposure, follow-up, and data collection                                                                                                                                                                                                                                                                               |
| Participants                 | 6       | (a) Give the eligibility criteria, and the sources and methods of selection of participants. Describe methods of follow-up<br>(b) For matched studies, give matching criteria and number of exposed and unexposed                                                                                                                                                                                             |
| Variables                    | 7       | Clearly define all outcomes, exposures, predictors, potential confounders, and effect modifiers. Give diagnostic criteria, if applicable                                                                                                                                                                                                                                                                      |
| Data sources/<br>measurement | 8*      | For each variable of interest, give sources of data and details of methods of assessment (measurement). Describe comparability of assessment methods if there is more than one group                                                                                                                                                                                                                          |
| Bias                         | 9       | Describe any efforts to address potential sources of bias                                                                                                                                                                                                                                                                                                                                                     |
| Study size                   | 10      | Explain how the study size was arrived at                                                                                                                                                                                                                                                                                                                                                                     |
| Quantitative variables       | 11      | Explain how quantitative variables were handled in the analyses. If applicable, describe which groupings were chosen and why                                                                                                                                                                                                                                                                                  |
| Statistical methods          | 12      | (a) Describe all statistical methods, including those used to control for confounding<br>(b) Describe any methods used to examine subgroups and interactions<br>(c) Explain how missing data were addressed<br>(d) If applicable, explain how loss to follow-up was addressed<br>(e) Describe any sensitivity analyses                                                                                        |
| <b>Results</b>               |         |                                                                                                                                                                                                                                                                                                                                                                                                               |
| Participants                 | 13*     | (a) Report numbers of individuals at each stage of study—eg numbers potentially eligible, examined for eligibility, confirmed eligible, included in the study, completing follow-up, and analysed<br>(b) Give reasons for non-participation at each stage<br>(c) Consider use of a flow diagram                                                                                                               |
| Descriptive data             | 14*     | (a) Give characteristics of study participants (eg demographic, clinical, social) and information on exposures and potential confounders<br>(b) Indicate number of participants with missing data for each variable of interest<br>(c) Summarise follow-up time (eg, average and total amount)                                                                                                                |
| Outcome data                 | 15*     | Report numbers of outcome events or summary measures over time                                                                                                                                                                                                                                                                                                                                                |
| Main results                 | 16      | (a) Give unadjusted estimates and, if applicable, confounder-adjusted estimates and their precision (eg, 95% confidence interval). Make clear which confounders were adjusted for and why they were included<br>(b) Report category boundaries when continuous variables were categorized<br>(c) If relevant, consider translating estimates of relative risk into absolute risk for a meaningful time period |

|    |                          |    |                                                                                        |
|----|--------------------------|----|----------------------------------------------------------------------------------------|
| 1  | Other analyses           | 17 | Report other analyses done—eg analyses of subgroups and interactions, and              |
| 2  |                          |    | sensitivity analyses                                                                   |
| 3  | <b>Discussion</b>        |    |                                                                                        |
| 4  | Key results              | 18 | Summarise key results with reference to study objectives                               |
| 5  | Limitations              | 19 | Discuss limitations of the study, taking into account sources of potential bias or     |
| 6  |                          |    | imprecision. Discuss both direction and magnitude of any potential bias                |
| 7  | Interpretation           | 20 | Give a cautious overall interpretation of results considering objectives, limitations, |
| 8  |                          |    | multiplicity of analyses, results from similar studies, and other relevant evidence    |
| 9  | Generalisability         | 21 | Discuss the generalisability (external validity) of the study results                  |
| 10 | <b>Other information</b> |    |                                                                                        |
| 11 | Funding                  | 22 | Give the source of funding and the role of the funders for the present study and, if   |
| 12 |                          |    | applicable, for the original study on which the present article is based               |
| 13 |                          |    |                                                                                        |
| 14 |                          |    |                                                                                        |
| 15 |                          |    |                                                                                        |
| 16 |                          |    |                                                                                        |
| 17 |                          |    |                                                                                        |
| 18 |                          |    |                                                                                        |
| 19 |                          |    |                                                                                        |
| 20 |                          |    |                                                                                        |
| 21 |                          |    |                                                                                        |
| 22 |                          |    |                                                                                        |
| 23 |                          |    |                                                                                        |
| 24 |                          |    |                                                                                        |
| 25 |                          |    |                                                                                        |
| 26 |                          |    |                                                                                        |
| 27 |                          |    |                                                                                        |
| 28 |                          |    |                                                                                        |
| 29 |                          |    |                                                                                        |
| 30 |                          |    |                                                                                        |
| 31 |                          |    |                                                                                        |
| 32 |                          |    |                                                                                        |
| 33 |                          |    |                                                                                        |
| 34 |                          |    |                                                                                        |
| 35 |                          |    |                                                                                        |
| 36 |                          |    |                                                                                        |
| 37 |                          |    |                                                                                        |
| 38 |                          |    |                                                                                        |
| 39 |                          |    |                                                                                        |
| 40 |                          |    |                                                                                        |
| 41 |                          |    |                                                                                        |
| 42 |                          |    |                                                                                        |
| 43 |                          |    |                                                                                        |
| 44 |                          |    |                                                                                        |
| 45 |                          |    |                                                                                        |
| 46 |                          |    |                                                                                        |
| 47 |                          |    |                                                                                        |
| 48 |                          |    |                                                                                        |
| 49 |                          |    |                                                                                        |
| 50 |                          |    |                                                                                        |
| 51 |                          |    |                                                                                        |
| 52 |                          |    |                                                                                        |
| 53 |                          |    |                                                                                        |
| 54 |                          |    |                                                                                        |
| 55 |                          |    |                                                                                        |
| 56 |                          |    |                                                                                        |
| 57 |                          |    |                                                                                        |
| 58 |                          |    |                                                                                        |
| 59 |                          |    |                                                                                        |
| 60 |                          |    |                                                                                        |

\*Give information separately for exposed and unexposed groups.

**Note:** An Explanation and Elaboration article discusses each checklist item and gives methodological background and published examples of transparent reporting. The STROBE checklist is best used in conjunction with this article (freely available on the Web sites of PLoS Medicine at <http://www.plosmedicine.org/>, Annals of Internal Medicine at <http://www.annals.org/>, and Epidemiology at <http://www.epidem.com/>). Information on the STROBE Initiative is available at <http://www.strobe-statement.org>.





## Multi-Gene Interactions and the Prediction of Depression in the Wisconsin Longitudinal Study

|                                 |                                                                                                                                                                                                                                                                                                                                                                                |
|---------------------------------|--------------------------------------------------------------------------------------------------------------------------------------------------------------------------------------------------------------------------------------------------------------------------------------------------------------------------------------------------------------------------------|
| Journal:                        | <i>BMJ Open</i>                                                                                                                                                                                                                                                                                                                                                                |
| Manuscript ID:                  | bmjopen-2012-000944.R1                                                                                                                                                                                                                                                                                                                                                         |
| Article Type:                   | Research                                                                                                                                                                                                                                                                                                                                                                       |
| Date Submitted by the Author:   | 30-Apr-2012                                                                                                                                                                                                                                                                                                                                                                    |
| Complete List of Authors:       | Roetker, Nicholas; UW-Madison, Sociology<br>Yonker, James; UW-Madison, Sociology<br>Lee, Chee; UW-Madison, Sociology<br>Chang, Vicky; UW-Madison, Sociology<br>Basson, Jacob; UW-Madison, Medicine<br>Roan, Carol; UW-Madison, Sociology<br>Hauser, Taissa; UW-Madison, Sociology<br>Hauser, Robert; UW-Madison, Sociology<br>Atwood, Craig; University of Wisconsin, Medicine |
| <b>Primary Subject Heading</b>: | Mental health                                                                                                                                                                                                                                                                                                                                                                  |
| Secondary Subject Heading:      | Epidemiology, Mental health, Neurology, Genetics and genomics, Public health                                                                                                                                                                                                                                                                                                   |
| Keywords:                       | EPIDEMIOLOGY, MENTAL HEALTH, Neurogenetics < NEUROLOGY, Anxiety disorders < PSYCHIATRY, Depression & mood disorders < PSYCHIATRY                                                                                                                                                                                                                                               |
|                                 |                                                                                                                                                                                                                                                                                                                                                                                |

SCHOLARONE™  
Manuscripts

only

STROBE Statement—Checklist of items that should be included in reports of *cohort studies*

|                              | Item No | Recommendation                                                                                                                                                                                                                                                                                                                                                                                                |
|------------------------------|---------|---------------------------------------------------------------------------------------------------------------------------------------------------------------------------------------------------------------------------------------------------------------------------------------------------------------------------------------------------------------------------------------------------------------|
| <b>Title and abstract</b>    | 1       | (a) Indicate the study's design with a commonly used term in the title or the abstract<br>(b) Provide in the abstract an informative and balanced summary of what was done and what was found                                                                                                                                                                                                                 |
| <b>Introduction</b>          |         |                                                                                                                                                                                                                                                                                                                                                                                                               |
| Background/rationale         | 2       | Explain the scientific background and rationale for the investigation being reported                                                                                                                                                                                                                                                                                                                          |
| Objectives                   | 3       | State specific objectives, including any prespecified hypotheses                                                                                                                                                                                                                                                                                                                                              |
| <b>Methods</b>               |         |                                                                                                                                                                                                                                                                                                                                                                                                               |
| Study design                 | 4       | Present key elements of study design early in the paper                                                                                                                                                                                                                                                                                                                                                       |
| Setting                      | 5       | Describe the setting, locations, and relevant dates, including periods of recruitment, exposure, follow-up, and data collection                                                                                                                                                                                                                                                                               |
| Participants                 | 6       | (a) Give the eligibility criteria, and the sources and methods of selection of participants. Describe methods of follow-up<br>(b) For matched studies, give matching criteria and number of exposed and unexposed                                                                                                                                                                                             |
| Variables                    | 7       | Clearly define all outcomes, exposures, predictors, potential confounders, and effect modifiers. Give diagnostic criteria, if applicable                                                                                                                                                                                                                                                                      |
| Data sources/<br>measurement | 8*      | For each variable of interest, give sources of data and details of methods of assessment (measurement). Describe comparability of assessment methods if there is more than one group                                                                                                                                                                                                                          |
| Bias                         | 9       | Describe any efforts to address potential sources of bias                                                                                                                                                                                                                                                                                                                                                     |
| Study size                   | 10      | Explain how the study size was arrived at                                                                                                                                                                                                                                                                                                                                                                     |
| Quantitative variables       | 11      | Explain how quantitative variables were handled in the analyses. If applicable, describe which groupings were chosen and why                                                                                                                                                                                                                                                                                  |
| Statistical methods          | 12      | (a) Describe all statistical methods, including those used to control for confounding<br>(b) Describe any methods used to examine subgroups and interactions<br>(c) Explain how missing data were addressed<br>(d) If applicable, explain how loss to follow-up was addressed<br>(e) Describe any sensitivity analyses                                                                                        |
| <b>Results</b>               |         |                                                                                                                                                                                                                                                                                                                                                                                                               |
| Participants                 | 13*     | (a) Report numbers of individuals at each stage of study—eg numbers potentially eligible, examined for eligibility, confirmed eligible, included in the study, completing follow-up, and analysed<br>(b) Give reasons for non-participation at each stage<br>(c) Consider use of a flow diagram                                                                                                               |
| Descriptive data             | 14*     | (a) Give characteristics of study participants (eg demographic, clinical, social) and information on exposures and potential confounders<br>(b) Indicate number of participants with missing data for each variable of interest<br>(c) Summarise follow-up time (eg, average and total amount)                                                                                                                |
| Outcome data                 | 15*     | Report numbers of outcome events or summary measures over time                                                                                                                                                                                                                                                                                                                                                |
| Main results                 | 16      | (a) Give unadjusted estimates and, if applicable, confounder-adjusted estimates and their precision (eg, 95% confidence interval). Make clear which confounders were adjusted for and why they were included<br>(b) Report category boundaries when continuous variables were categorized<br>(c) If relevant, consider translating estimates of relative risk into absolute risk for a meaningful time period |

|                          |    |                                                                                                                                                                            |
|--------------------------|----|----------------------------------------------------------------------------------------------------------------------------------------------------------------------------|
| Other analyses           | 17 | Report other analyses done—eg analyses of subgroups and interactions, and sensitivity analyses                                                                             |
| <b>Discussion</b>        |    |                                                                                                                                                                            |
| Key results              | 18 | Summarise key results with reference to study objectives                                                                                                                   |
| Limitations              | 19 | Discuss limitations of the study, taking into account sources of potential bias or imprecision. Discuss both direction and magnitude of any potential bias                 |
| Interpretation           | 20 | Give a cautious overall interpretation of results considering objectives, limitations, multiplicity of analyses, results from similar studies, and other relevant evidence |
| Generalisability         | 21 | Discuss the generalisability (external validity) of the study results                                                                                                      |
| <b>Other information</b> |    |                                                                                                                                                                            |
| Funding                  | 22 | Give the source of funding and the role of the funders for the present study and, if applicable, for the original study on which the present article is based              |

\*Give information separately for exposed and unexposed groups.

**Note:** An Explanation and Elaboration article discusses each checklist item and gives methodological background and published examples of transparent reporting. The STROBE checklist is best used in conjunction with this article (freely available on the Web sites of PLoS Medicine at <http://www.plosmedicine.org/>, Annals of Internal Medicine at <http://www.annals.org/>, and Epidemiology at <http://www.epidem.com/>). Information on the STROBE Initiative is available at <http://www.strobe-statement.org>.

1  
2  
3  
4  
5  
6  
7  
8 **Multi-Gene Interactions and the Prediction of Depression in the Wisconsin**  
9 **Longitudinal Study**  
10  
11  
12

13  
14 Nicholas S. Roetker<sup>1</sup>, James A. Yonker<sup>1</sup>, Chee Lee<sup>1</sup>, Vicky Chang<sup>1</sup>, Jacob Basson<sup>2</sup>, Carol L. Roan<sup>1</sup>,  
15 Taissa S. Hauser<sup>1</sup>, Robert M. Hauser<sup>1</sup> and Craig S. Atwood<sup>2,3</sup>.  
16  
17  
18

19  
20 <sup>1</sup>Department of Sociology, University of Wisconsin-Madison, Madison, WI 53706, USA.  
21

22 <sup>2</sup>Geriatric Research, Education and Clinical Center, Veterans Administration Hospital and Department of  
23 Medicine, University of Wisconsin-Madison School of Medicine and Public Health, Madison, WI 53705,  
24 USA.  
25  
26

27  
28 <sup>3</sup>School of Exercise, Biomedical and Health Sciences, Edith Cowan University, Joondalup, 6027 WA,  
29 Australia.  
30  
31

32 **Running title:** Gene interactions and depression  
33

34 **Address Correspondence and Reprint Requests to:**

35 Craig S. Atwood, Ph.D.  
36 University of Wisconsin-Madison School of Medicine and Public Health  
37 Wm S. Middleton Memorial VA (GRECC 11G)  
38 2500 Overlook Terrace, Madison, WI 53705, USA  
39 Tel. 608 256-1901, Ext. 11664  
40 Fax. 608 280-7291  
41 Email: [csa@medicine.wisc.edu](mailto:csa@medicine.wisc.edu)  
42  
43  
44  
45  
46  
47  
48  
49  
50  
51  
52  
53  
54  
55  
56  
57  
58  
59  
60

**ABSTRACT**

**Objectives:** Single genetic loci offer little predictive power for the identification of depression. This study examined whether an analysis of gene-gene interactions of 78 single nucleotide polymorphisms in genes associated with depression and age-related diseases would identify significant interactions with increased predictive power for depression.

**Design:** A retrospective cohort study.

**Setting:** A survey of participants in the Wisconsin Longitudinal Study.

**Participants:** A total of 4,811 persons (2,464 females and 2,347 males) who provided saliva for genotyping; the group comes from a randomly selected sample of Wisconsin high school graduates from the class of 1957 as well as a randomly selected sibling, almost all of whom are non-Hispanic white.

**Primary outcome measure:** Depression as determined by the Composite International Diagnostic Interview short-form (CIDI-SF).

**Results:** Using a classification tree approach (recursive partitioning (RP)) we identified a number of candidate gene-gene interactions associated with depression. The primary SNP splits revealed by RP (*ANKK1* rs1800497 (also known as *DRD2* Taq1A) in men and *DRD2* rs224592 in women) were found to be significant as single factors by logistic regression (LR) after controlling for multiple testing ( $P=0.001$  for both). Without considering interaction effects, only 1 of the 5 subsequent RP splits reached nominal significance in logistic regression (*FTO* rs1421085 in women;  $P$ -value=0.008). However, after controlling for gene-gene interactions by running logistic regression on RP-specific subsets, every split became significant and grew larger in magnitude (OR [before]→[after]: Men: *GNRH1* novel SNP: [1.43 → 1.57]; Women: *APOC3* rs2854116: [1.28 → 1.55], *ACVR2B* rs3749386: [1.11 → 2.17], *FTO* rs1421085: [1.32 → 1.65], *IL6* rs1800795: [1.12 → 1.85]).

**Conclusions:** Our results suggest that examining gene-gene interactions improves the identification of genetic associations predictive of depression. Four of the SNPs identified in these interactions were located in two pathways well-known to impact depression: neurotransmitter (*ANKK1* and *DRD2*) and

Formatted: Font: Italic

1  
2  
3  
4  
5  
6  
7  
8  
9  
10  
11  
12  
13  
14  
15  
16  
17  
18  
19  
20  
21  
22  
23  
24  
25  
26  
27  
28  
29  
30  
31  
32  
33  
34  
35  
36  
37  
38  
39  
40  
41  
42  
43  
44  
45  
46  
47  
48  
49  
50  
51  
52  
53  
54  
55  
56  
57  
58  
59  
60

neuroendocrine (*GNRH1* and *ACVR2B*) signaling. This study demonstrates the utility of RP analysis as an efficient and powerful exploratory analysis technique for uncovering genetic and molecular pathway interactions associated with disease etiology.

For peer review only

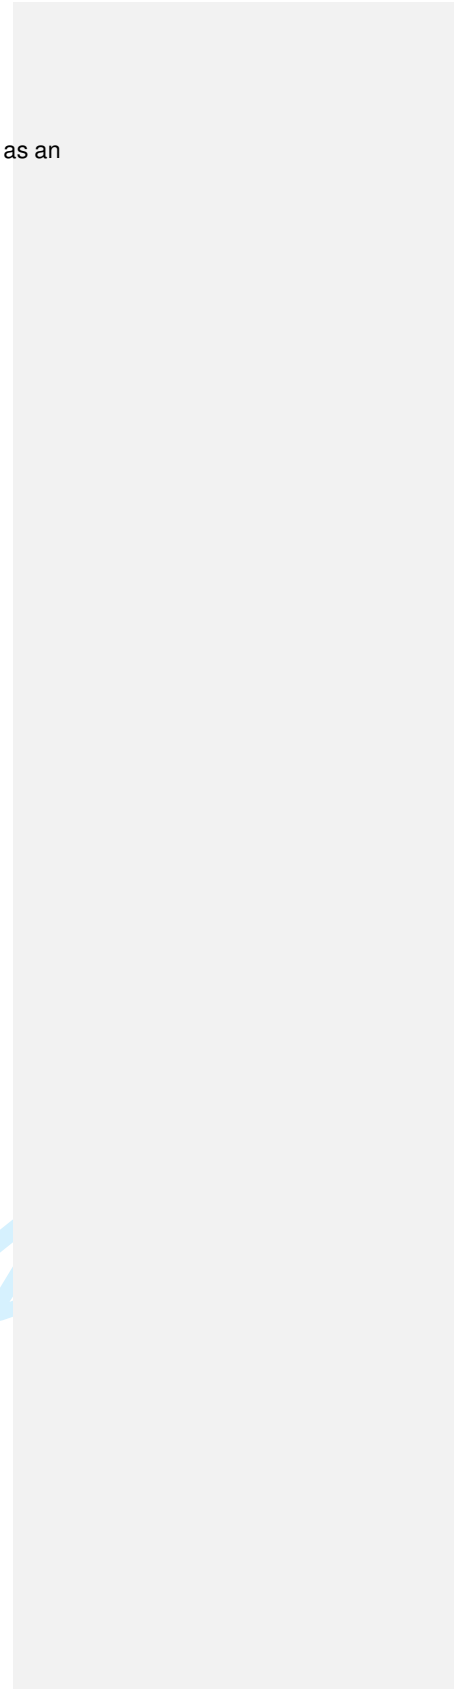

## INTRODUCTION

Depression is a widespread mental disorder associated with a host of undesirable health, social, and economic outcomes. One in six Americans is diagnosed with depression in his or her lifetime (1). While many environmental factors—such as socioeconomic status, childhood abuse, and major life events—have important ties with depression, so too does gender and many genetic and epigenetic factors, making the disorder heterogeneous in nature (2). Another major risk factor for depression is age, with depression reaching its highest levels in adults over 80 years of age (3).

It has been demonstrated from twin studies that genetic factors typically account for 40–70% of the risk for developing major depressive disorder (MDD), and adoption studies have confirmed the role of genetic risk factors in the development of MDD (see (4) and references therein). Genetic studies, including recent genome-wide association studies (GWAS), have identified genetic alterations in over 50 genes known to be associated with depression (5). However, individually, the genetic alterations found within these genes (primarily single nucleotide polymorphisms (SNPs)) have little predictive value. There is a similar lack of predictive value from GWAS of other major age-related diseases (6).

Given this lack of predictive power among individual genetic alterations for depression together with the complex nature of aging-related diseases, it would seem prudent to examine epistatic effects on this age-related condition. In this respect, we have previously demonstrated that G x G interactions greatly modulate risk for complex age-related diseases (7, 8). Recent studies of depression also have identified epistatic effects. In particular, associations have been identified between *BDNF* Val66Met (brain-derived neurotrophic factor; rs6265) and *5-HTTLPR* (serotonin transporter linked promoter region) (9); *GSK3B* rs6782799 (glycogen synthase kinase 3 $\beta$ ), *BDNF* rs7124442 and *BDNF* Val66Met (10); *BDNF* Val66Met and SNPs in *NTRK2* (neurotrophic tyrosine kinase receptor 2; (11)), and *5-HTTLPR* short allele and a chromosome 4 gene (12).

[The goals of this study were therefore to 1\) explore G x G interactions that might better predict the genetic factors involved in the etiology of depression, and 2\) to determine the utility of machine learning](#)

1  
2  
3  
4  
5  
6  
7  
8 [algorithms \(recursive partitioning\) to identify genetic interactions. Using genotypic data from the](#)  
9 [In this study, we have assessed the epistatic effects of known genetic alterations that link to](#)  
10 [depression and age-related diseases in the](#) Wisconsin Longitudinal Study (WLS) [Using recursive](#)  
11 [partitioning \(RP\) and logistic regression \(LR\)](#) we identified associations between dopaminergic genes and  
12  
13 depression in men and women, as well as G x G interactions involving neuroendocrine signaling  
14  
15 pathways, with increased significance compared with single genetic associations.  
16  
17  
18  
19  
20  
21  
22  
23  
24  
25  
26  
27  
28  
29  
30  
31  
32  
33  
34  
35  
36  
37  
38  
39  
40  
41  
42  
43  
44  
45  
46  
47  
48  
49  
50  
51  
52  
53  
54  
55  
56  
57  
58  
59  
60



## METHODS

### Study Participants and Surveys

Data were collected from the WLS, a random sample originally comprised of 10,317 men and women who graduated from Wisconsin high schools in 1957. Later in 1977, the WLS began interviewing one randomly selected sibling of each graduate, when possible. The cohort ~~consists~~ reflects the ancestral makeup of the late-1950s Wisconsin population in that participants are almost entirely ~~of~~ non-Hispanic white ~~persons~~ males and females, whose average level of educational attainment was 1.5 years of post-high school education at the time of interview in 2004. Ages of participants in the WLS ranged from 35 to 99 years old at this time, with 83% of participants being between 60 and 70 years old. In general, the sample is broadly representative of older white Americans with at least a high school education (13).

Formatted: Font color: Red

Further characteristics of the WLS cohort may be found in detail elsewhere (14). Health and psychological well-being phenotypic data was taken from mail and phone surveys given in 2004-2005. Our main measure of depression is based on a variation of the Composite International Diagnostic Interview short-form (CIDI-SF). All participants answered a single stem question: "Have you ever had a time in life lasting two weeks or more when nearly every day you felt sad, blue, depressed, or when you lost interest in most things like work, hobbies, or things you usually liked to do for fun?" Only those who answered YES and whose depression was not always caused by alcohol, drugs, medications, or physical illness were asked further depression symptom questions. Symptom questions asked whether the two week period was accompanied with a) any weight loss, b) trouble sleeping, c) feeling tired, d) feeling bad upon waking, e) losing interest, f) trouble concentrating, or g) thoughts about death. Those answering YES to 3 or more of these symptom questions were classified as having depression (15). Those answering YES to 2 or fewer symptom questions and all those answering NO to the initial stem question were classified as controls.

### Genotyping

7,101 participants (4,569 graduates & 2,532 siblings) provided saliva samples in Oragene DNA sample

1  
2  
3  
4  
5  
6  
7  
8 collection kits from which DNA was extracted and genotyped for 78 SNPs that were selected based on  
9 their association with depression and age-related conditions and diseases [\(see Supplementary](#)  
10 [Information 1\)](#). Genotyping was performed by KBioscience (Hoddesdon, UK) with use of a homogeneous  
11 Fluorescent Resonance Energy Transfer technology coupled to competitive allele specific PCR. All SNP  
12 genotypes described in our results were in Hardy-Weinberg equilibrium and their frequencies matched  
13 those reported in the literature for European samples.  
14  
15  
16  
17  
18  
19

### 20 Statistical Analysis

21 Analyses were limited to the 4,811 pooled graduates and siblings for whom we have depression and  
22 genotype information (Note: individuals with more than 10% missing genotype data were not included).  
23 The average age among this sample was just under 65 years in 2004. 80% were married, and the  
24 average amount of post-high school educational attainment was 2 years. Median household income in  
25 1993 was \$56,700.  
26  
27  
28  
29  
30  
31

32 *Recursive Partitioning (RP).* RP is a data mining tool for revealing trends that relate a dependent  
33 variable (~~depression incidence~~ depressed vs. non-depressed) to various predictor variables (SNPs). Zhang  
34 and Bonney have shown how RP can be used in genetic association studies to identify disease genes  
35 (16). RP helps control for heterogeneity in the population and confounding factors by allowing for the  
36 segregation of the sample population according to any condition. Thus, RP is a useful way to handle  
37 complex datasets that might confound regression analysis due to the complexity of the relationship  
38 between the independent and dependent variables and due to missing information.  
39  
40  
41  
42  
43  
44

45 RP classification trees (using R package rpart) were used to identify potential interactions among the  
46 78 SNPs in relation to depression. The trees split the data along branches according to criteria determined  
47 by the rpart package algorithm, which is originally based off the work of Breiman's classification and  
48 regression trees (CART) algorithm (17). Basically, the CART algorithm first considers all depressed and  
49  
50  
51

7

Formatted: Indent: Left: 0", First line: 0"

1  
2  
3  
4  
5  
6  
7  
8 non-depressed subjects pooled together in a heterogeneous root node. Based on considering every  
9 possible “yes-no” binary partition that can be made by each independent variable, the single split which  
10 maximizes homogeneity between the two resulting sub-nodes as compared to the root node is made.  
11  
12 Each sub-node can then be treated independently as a new root node for all subsequent splits, and the  
13 pattern continues until every subject constitutes a terminal node, resulting in a very large and complex  
14 tree. A 10-part cross validation procedure seeking to minimize misclassification and complexity  
15 determines optimal pruning. See Therneau and Atkinson (18) for specific details of the rpart package.  
16  
17

18  
19 Priors were set to 0.5, 0.5. The usesurrogate parameter was set to 0 so that subjects missing the primary  
20 split variable do not progress further down the tree, and maxsurrogate was set to 0 to cut computation  
21 time in half. The threshold complexity parameter (cp) was set to 0.01. Tree nodes were re-created in  
22 Microsoft Visio to display percentage depressed depression incidence (in %) and total number of  
23 participants rather than and the default number of controls/cases as presented by rpart.  
24  
25  
26  
27  
28  
29

30  
31 *Logistic Regression (LR).* Variables found in association with depression based on RP analysis were  
32 considered in single factor LR models, separate by gender, using the specific dichotomous splitting of  
33 genotypes as designated by RP trees. Regression models for all seven SNP splits were first run on the full  
34 dataset to represent single main factor effects. Then each split was run on the respective subset of data  
35 as represented by the preceding RP split criteria. Thus, we attempt to mirror RP splits within a more  
36 formal LR framework in order to measure the significance of interactions presented by the trees. Multiple  
37 testing of 78 SNPs in RP for both male and females followed by 14 LR models resulted in a modified FDR  
38 significance level of 0.009.  
39  
40  
41  
42  
43  
44  
45  
46  
47  
48  
49  
50  
51  
52  
53  
54  
55  
56  
57  
58  
59  
60

## RESULTS

Of the 4,811 participants ~~with complete survey information on GIDI-SF depression~~ (2,464 females and 2,347 males) ~~under examination in this study~~, we identified 713 participants (481 females and 232 males) with depression (14.8%). Given that the independent variable gender (when included as a factor in the full dataset) was the primary split on RP trees; that women are over two times as likely to be diagnosed with depression than men; and since the female etiology of depression has been reported to be associated with unique social, psychological, and biological factors (19), all subsequent analyses were performed by gender.

### Recursive Partition Analysis

To examine multi-gene interactions for association with depression we screened our dataset using RP. The two-factor RP tree (*ANKK1/GNRH1*) was the optimized pruning for men (Fig. 1), while the five-factor tree (*DRD2/APOC3/ACVR2B/FTO/IL6*) was the optimized pruning for women (Fig. 2). ~~For more detailed information on the 7 SNPs found by RP, see Supplementary Information 2.~~ The best overall split for men was *ANKK1* rs1800497 (~~historically known as the *DRD2* Taq1A allele~~), where the incidence of depression increased 2.2-fold in those with no C-alleles compared to those with one or two C-alleles. Considering interaction between *ANKK1* and *GNRH1* widened the disparity in incidence, where those with at least one C-allele in both *ANKK1* rs1800497 and the novel SNP in *GNRH1* had a 2.7-fold lower incidence than those without a C-allele in *ANKK1* rs1800497.

For women, the best overall split was *DRD2* rs2242592, where those with one or two C-alleles had 1.3-fold higher incidence of depression compared to those without any C-alleles. G x G interactions associated with the highest incidence of depression included: *DRD2* rs2242592 T/T + *APOC3* rs45537037 T/T + *ACVR2B* rs3749386 C/C or T/T, accounting for a 1.4-fold increase in depression compared to baseline incidence.

### Single Main-Factor Effects

Specific SNP interactions identified by RP were next analyzed by LR (see Table 1, Full Data). The primary SNP splits in males and females were significant at the modified FDR level. Men with no C-alleles for *ANKK1* rs1800497 had 2.55 times higher odds [P=0.001 (1.44, 4.51)] of depression compared with men with at least 1 C-allele. Women with at least 1 C-allele for *DRD2* rs2242592 had 1.32 times higher odds [P=0.006 (1.08-1.62)] of depression compared with women with no C-alleles. One other split reached nominal significance; women homozygous (C/C or T/T) for *FTO* rs1421085 had 1.32 times higher odds [P=0.008 (1.08-1.62)] for depression than women with a heterozygous genotype. SNP splits of *GNRH1*, *APOC3*, *ACVR2B*, and *IL6* did not significantly associate with depression.

### Gene-Gene Interactions Enhance Predictability for Depression

Specific SNP interactions identified by RP were next analyzed by LR as RP-specific subsets (see Table 1, RP-Subsetted Data). All 5 of the secondary and tertiary RP splits were found to be significant at the modified FDR level when considered as subsets. Among only men with at least one C-allele in *ANKK1* rs1800497, those with no C-allele in the novel SNP of *GNRH1* had 1.57 times higher odds [P=0.002 (1.18-2.08)] for depression than men with 1 or 2 C-alleles. For the subset of women in the first right-hand split of Fig. 2, those homozygous for *FTO* rs1421085 had 1.65 times higher odds [P=0.0005 (1.24-2.18)] for depression than women with a heterozygous genotype. For the remaining subset of women in the second right-hand split of Fig. 2, those homozygous for *IL6* rs1800795 had 1.85 times higher odds [P=0.006 (1.19-2.89)] for depression than women with a heterozygous genotype. For the subset of women in the first left-hand split of Fig. 2, those with no C-alleles for *APOC3* rs45537037 had 1.55 times higher odds [P=0.004 (1.15-2.09)] for depression than women with 1 or 2 C-alleles. For the subset of women in the second left-hand split of Fig. 2, those homozygous for *ACVR2B* rs3749386 had 2.17 times higher odds [P=0.001 (1.37-3.44)] for depression than women with a heterozygous genotype.

## DISCUSSION

Utilizing RP as a screening tool to find potential multi-gene interactions, followed by verification of multi-gene interactions with LR, our data demonstrate that multi-gene interactions predict depression with a greater certainty than single main factor associations. RP provided us with primary dichotomous genotype splits in men and women (*ANKK1* rs1800497 and *DRD2* rs2242592, respectively) that were both significant in LR models at the modified FDR level (Table 1). Considering the 5 subsequent RP splits in LR over the entire dataset, only 1 reached a nominal level of significance (barely), which was *FTO* rs1421085 in women. However, after running LR on specific subsets of data according to the pattern of RP branches, every split was found to be significant and every odds ratios grew larger (Table 1; OR [before]→[after]: Male Left: 1.43 → 1.57, Female Left 1: 1.28 → 1.55, Female Left 2: 1.11 → 2.17, Female Right 1: 1.32 → 1.65, Female Right 2: 1.12 → 1.85). Thus, RP provides two unique and important criteria: dichotomous genotype splitting instructions and gene-gene interaction patterns. These criteria go beyond the traditional single factor SNP approach to genetic association studies and allow identification of important multi-gene pathways that more suitably characterize the etiology of complex diseases.

### The Utility of Recursive Partitioning, ~~Multi-factor Dimensionality Reduction~~ and Logistic Regression for Identification of Gene-Gene Interactions

With recent advances in genotyping allowing for high-dimensional SNP identification, it is now possible to examine genetic datasets not only for single main factor effects, but also G x G interactions. The requirement for G x G analyses as a better predictor of age-related diseases is obvious from the standpoint that humans are complex biological systems composed of numerous molecular interactions, and from recent studies indicating disease risk is modulated by G x G interactions (7). Notwithstanding this, the development of analytical tools for the identification of G x G interactions has not kept pace with

1  
2  
3  
4  
5  
6  
7  
8  
9 the technological advances in identifying genetic alterations among individuals. In this respect, we have  
10 previously used MDR, LR and LD to identify G x G interactions among a small set of SNPs (7). However,  
11 large datasets require a screening tool to identify potential multi-gene interactions. In this study, we have  
12 used RP to screen for multi-gene interactions, a data-mining technique that is currently under-utilized in  
13 genetic studies. RP serves as an efficient and powerful exploratory analysis technique, especially when  
14 looking for interactions in data sets with a large number of independent variables. This screening allows  
15 for the identification of G x G interactions (with greater explanatory power), that might otherwise not have  
16 been identified, and that can then be confirmed using more traditional statistical techniques. As illustrated  
17 in this paper, this data-mining methodology has the advantage of identification of genetic interactions  
18 *between* pathways involved in the etiology of depression, in keeping with the etiological heterogeneity of  
19 this disorder (see later).  
20  
21  
22  
23  
24  
25  
26  
27

28 Our study provides proof of principle for the use of RP in higher-dimensional analyses such as GWAS,  
29 where a comprehensive list of SNPs may fully explore genetic predisposition to depression and other age-  
30 related disease. The WLS is an ideal candidate for future GWAS studies given its large sample size, rich  
31 covariate composition and longitudinal nature.  
32  
33  
34

35 In this genetic study we aimed to identify underlying genetic predispositions to depression and thus  
36 have not yet tested environmental/phenotypic data. Future analyses using RP to examine the impact of  
37 phenotypic and environmental factors on the development of depression would be anticipated to identify  
38 gene-phenotype/environment and multi-phenotype/environment interactions. Indeed, the predictive gains  
39 of G x G analyses were stronger for men than women, despite the fact that depression occurs  
40 disproportionately in women (~2:1 female-to-male; (20-24)). This suggests that environmental factors may  
41 be needed in addition to genetic factors in understanding the etiological pathways for women. Indeed,  
42 biological factors such as hormonal changes related to reproductive status (25, 26) may impact  
43 environmental factors such as psychosocial experiences (trauma, stress, interpersonal relationships, etc)  
44 and general health issues in the development of depression.  
45  
46  
47  
48  
49  
50  
51  
52  
53  
54  
55  
56  
57  
58  
59  
60

### Genetic and Biological Correlates of Depression

Numerous studies have identified SNPs that associate with depression. Many of the SNPs associated with depression from other studies were not significantly associated in our study. This is perhaps not surprising, since a single factor is unlikely to provide consistent association especially in a complex condition such as depression, where multiple pathways intersect in regulating the risk of the disease. For example, if a SNP within the serotonin pathway also requires a SNP in the glutamatergic pathway in order for the patient to present with depression, the presence of either SNP in the absence of the other will not be predictive of depression. Moreover, as indicated by Shi and Weinberg, since the human genome contains genetic redundancy, disruption of a single gene may be selectively neutral, but the malfunction of several genes in a pathway might result in expression of a particular phenotype (27).

Both the primary splits in men and women were SNPs linked with *DRD2* (dopamine receptor D2), a gene that has previously been linked with depression and social phobia (28-30). The primary male genotype split rs1800497, technically found in gene *ANKK1*, is historically known as the *DRD2* Taq1A allele because of its known association with decreased dopamine receptor D2 density (in those with T alleles) (31-34). The Taq1A allele has also been previously associated with depressive symptoms in children, where those with the A1 allele (T) were more likely to have depressive symptoms (35). We saw a similar association between A1 and depression in WLS men, where those with two A1 alleles had 2.6 times higher odds for depression compared to those with one or no A1 alleles. The primary split in women (*DRD2* rs2242592) has previously been found to be associated with schizophrenia, where the C-allele was associated with higher susceptibility for schizophrenia (36). Interestingly, this same study also found the Taq1A allele to also associate with schizophrenia.

The secondary and tertiary right-hand splits in the female RP tree—*FTO* (fat mass and obesity associated) rs1421085 and *IL6* (interleukin 6) rs1800795—have also been found to relate with mental illness and depression in previous studies (37, 38). There is evidence that activin receptor signaling also



1  
2  
3  
4  
5  
6  
7  
8  
9 is involved in affective disorders, especially when considering interaction with GABAergic pathways (39).  
10 Although we did not see an interaction between SNPs in GABA/activin receptor genes and depression,  
11 *ACVR2B* was associated with depression in women. No previous associations between depression and  
12 *APOC3*, *ACVR2B*, or *GNRH1* have been reported.  
13

14  
15 That these genetic variants are associated with *neuroendocrine* pathways (*GnRH1*, *ACVR2B*) that are  
16 known to regulate *neurotransmitter* release and cognitive behavior (39-40) supports these associations as  
17 relevant to the etiology of depression and underlines the benefits of using RP to identify meaningful G x G  
18 interactions associated with disease.  
19  
20  
21  
22  
23

#### 24 Limitations

25  
26 Given the numerous genetic, phenotypic and environmental influences that are linked to depression,  
27 and the small number of SNPs analyzed, it is not surprising that predictability from our models was low  
28 (although our predictability was superior to previous studies examining only single main factors). Also, the  
29 predictive value of our statistical models was further limited due to user bias in selection of SNPs (from  
30 nearly two-million SNPs in the human genome) used in this study. As a result of this, interactions we have  
31 found could potentially be moderated by another gene that we have not considered in this study.  
32  
33 Nonetheless, we identified significant G x G interactions between known, and newly identified, loci  
34 associated with depression. Importantly, 4 of the 7 SNPs identified in these interactions were primarily  
35 located in two pathways well-known to impact depression: neurotransmitter and neuroendocrine signaling.  
36  
37

38  
39 The results from the RP analyses conducted in this study were confirmed by LR, demonstrating the  
40 utility of RP as a screening tool for identifying meaningful G x G interactions. Future development of  
41 algorithms for RP analysis should not only maximize the distance between branches of the next best split  
42 (i.e. rpart), but consider subsequent future split combinations that could potentially result in trees with  
43  
44  
45  
46  
47  
48  
49 "better" overall predictability.  
50  
51  
52  
53  
54  
55  
56  
57  
58  
59  
60

1  
2  
3  
4  
5  
6  
7  
8  
9  
10  
11  
12  
13  
14  
15  
16  
17  
18  
19  
20  
21  
22  
23  
24  
25  
26  
27  
28  
29  
30  
31  
32  
33  
34  
35  
36  
37  
38  
39  
40  
41  
42  
43  
44  
45  
46  
47  
48  
49  
50  
51  
52  
53  
54  
55  
56  
57  
58  
59  
60

### Summary

Our data indicate that G x G interaction analyses allows for enhanced predictability of conditions and diseases of aging. RP is an efficient and powerful exploratory analysis technique for elucidating G x G interactions in large datasets and combined with LR provides an important statistical analysis for the identification of well supported G x G interactions. We predict that such analytical methods will play an increasingly important role in the identification of epistatic effects in future large GWAS. Finally, our studies illustrate how RP analyses can be used to find interacting pathways involved in the etiology of a disease or condition such as depression.

## ACKNOWLEDGMENTS

This research uses data from the Wisconsin Longitudinal Study (WLS) of the University of Wisconsin-Madison. Since 1991, the WLS has been supported principally by the National Institute on Aging (AG-9775, AG-21079 and AG-033285), with additional support from the Vilas Estate Trust, the National Science Foundation, the Spencer Foundation, and the Graduate School of the University of Wisconsin-Madison. A public use file of data from the Wisconsin Longitudinal Study is available from the Wisconsin Longitudinal Study, University of Wisconsin-Madison, 1180 Observatory Drive, Madison, Wisconsin 53706 and at <http://www.ssc.wisc.edu/wlsresearch/data/>. This material is the result of work supported with resources at the William S. Middleton Memorial Veterans Hospital, Madison, WI. The opinions expressed herein are those of the authors. The contents do not represent the views of the Dept. of Veterans Affairs or the United States Government.

## FIGURE LEGENDS

**Figure 1.** Recursive Partitioning Tree of CIDI-SF Depression in Males of the WLS. Upper and lower numbers in nodes represent the proportion-percentage of participants with depression and the number of participants-controls/cases in that node, respectively. Blue and purple boxes/circles indicate lower and higher rates of depression relative to the primary node, respectively. Split information indicates gene, SNP, and genotype criteria, respectively. M1 is subset of data referenced in Table 1. Sensitivity: 0.526, Specificity: 0.598, Accuracy: 0.591. Due to missing genotype information, we lose approximately 1.5% of participants per split. \*rs1800497 is historically known as the DRD2 Taq1A allele

**Figure 2.** Recursive Partitioning Tree of CIDI-SF Depression in Females of the WLS. Upper and lower numbers in nodes represent the proportion-percentage of participants with depression and the number of participants-controls/cases in that node, respectively. Blue and purple boxes/circles indicate lower and higher rates of depression relative to the primary node, respectively. Split information indicates gene, SNP, and genotype criteria, respectively. F1-F4 are subsets referenced in Table 1. Sensitivity: 0.607, Specificity: 0.563, Accuracy: 0.572. Due to missing genotype information, we lose approximately 1.4% of participants per split.

1  
2  
3  
4  
5  
6  
7  
8  
9  
10  
11  
12  
13  
14  
15  
16  
17  
18  
19  
20  
21  
22  
23  
24  
25  
26  
27  
28  
29  
30  
31  
32  
33  
34  
35  
36  
37  
38  
39  
40  
41  
42  
43  
44  
45  
46  
47  
48  
49  
50  
51  
52  
53  
54  
55  
56  
57  
58  
59  
60

For peer review only

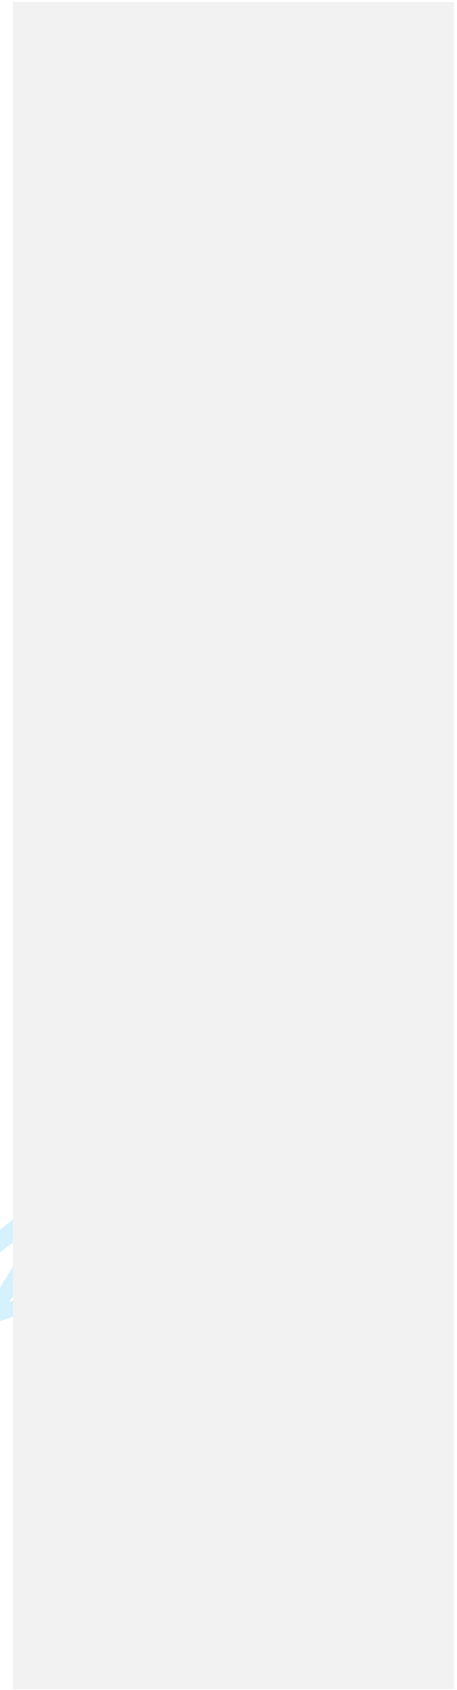

1  
2  
3  
4  
5  
6  
7  
8  
9  
10  
11  
12  
13  
14  
15  
16  
17  
18  
19  
20  
21  
22  
23  
24  
25  
26  
27  
28  
29  
30  
31  
32  
33  
34  
35  
36  
37  
38  
39  
40  
41  
42  
43  
44  
45  
46  
47  
48  
49

**Table 1.**

Single-factor logistic regression models based directly off male and female RP tree split criteria (see Figures 1 & 2). Each SNP split was first run on the full dataset to represent single main factor effects (“Full Data”) for both males and females. Then the same SNP splits were run on specific subsets of data per RP tree splits (M1, F1-F4; “RP-Subsetted Data”).

| Gender | RP Split | Gene          | SNP       | Genotypes         | Full Data        |         | RP-Subsetted Data |                  |          |
|--------|----------|---------------|-----------|-------------------|------------------|---------|-------------------|------------------|----------|
|        |          |               |           |                   | OR (95% CI)      | P-value | Subset            | OR (95% CI)      | P-value  |
| Male   | Primary  | <i>ANKK1*</i> | rs1800497 | T/T vs. C/C + C/T | 2.55 (1.44-4.51) | 0.001 * | --                | ----             | ----     |
|        | Left     | <i>GNRH1</i>  | novel SNP | T/T vs. C/C + T/C | 1.43 (1.09-1.88) | 0.011   | M1                | 1.57 (1.18-2.08) | 0.002 *  |
| Female | Primary  | <i>DRD2</i>   | rs2242592 | C/C + T/C vs. T/T | 1.32 (1.08-1.62) | 0.006 * | --                | ----             | ----     |
|        | Left 1   | <i>APOC3</i>  | rs2854116 | T/T vs. C/C + T/C | 1.28 (1.04-1.57) | 0.018   | F1                | 1.55 (1.15-2.09) | 0.004 *  |
|        | Left 2   | <i>ACVR2B</i> | rs3749386 | C/C + T/T vs. T/C | 1.11 (0.91-1.36) | 0.302   | F2                | 2.17 (1.37-3.44) | 0.001 *  |
|        | Right 1  | <i>FTO</i>    | rs1421085 | C/C + T/T vs. T/C | 1.32 (1.08-1.62) | 0.007 * | F3                | 1.65 (1.24-2.18) | 0.0005 * |
|        | Right 2  | <i>IL6</i>    | rs1800795 | C/C + G/G vs. C/G | 1.12 (0.92-1.37) | 0.269   | F4                | 1.85 (1.19-2.89) | 0.006 *  |

RP, recursive partitioning; OR, odds ratio; CI, confidence interval

M1: LR analysis was run for only those with genotype *DRD2* rs1800497 C/C or C/T

F1: LR analysis was run for only those with genotype *DRD2* rs2242592 T/T

F2: LR analysis was run for only those with genotypes *DRD2* rs2242592 T/T and *APOC3* rs2854116 T/T

F3: LR analysis was run for only those with genotype *DRD2* rs2242592 C/C or T/C

F4: LR analysis was run for only those with genotypes *DRD2* rs2242592 C/C or T/C and *FTO* rs1421085 T/C

*\*rs1800497 is historically known as the DRD2 Taq1A allele*

only

1  
2  
3  
4  
5  
6  
7  
8  
9  
10  
11  
12  
13  
14  
15  
16  
17  
18  
19  
20  
21  
22  
23  
24  
25  
26  
27  
28  
29  
30  
31  
32  
33  
34  
35  
36  
37  
38  
39  
40  
41  
42  
43  
44  
45  
46  
47  
48  
49

For peer review only

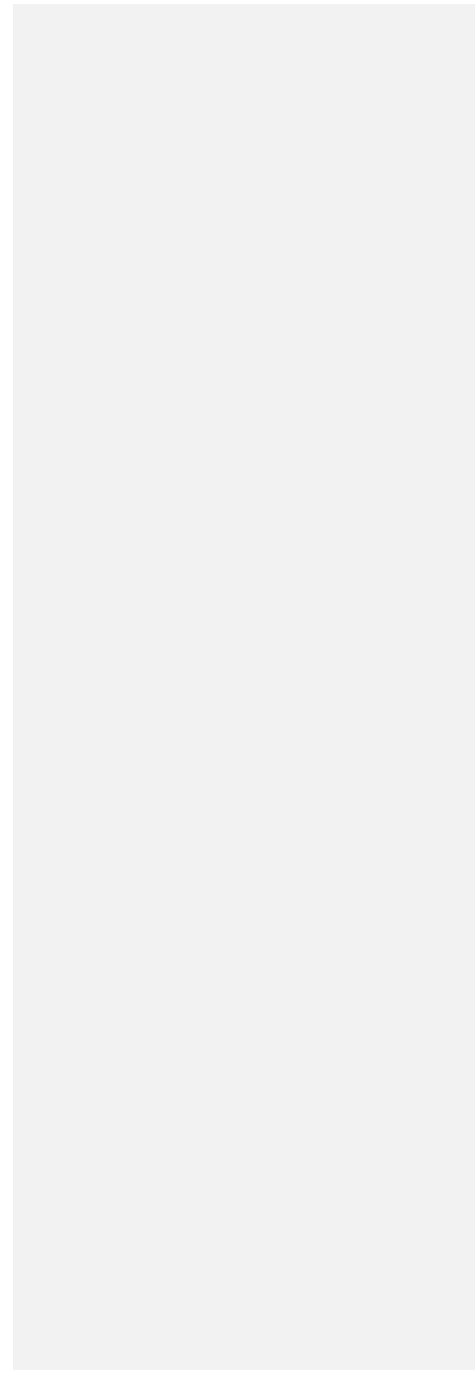

20

**REFERENCES**

1. CDC. Anxiety and Depression. Atlanta, GA: Centers for Disease Control and Prevention; 2009 [cited 2010 Oct. 18]; Available from: <http://www.cdc.gov/Features/dsBRFSSDepressionAnxiety/>.
2. Eley TC, Sugden K, Corsico A, Gregory AM, Sham P, McGuffin P, et al. Gene-environment interaction analysis of serotonin system markers with adolescent depression. *Mol Psychiatry*. 2004;9(10):908-15.
3. Mirowsky J, Ross CE. Age and Depression. *Journal of Health and Social Behavior*. 1992;33(3):187-205.
4. Zubenko GS, Zubenko WN, Spiker DG, Giles DE, Kaplan BB. Malignancy of recurrent, early-onset major depression: a family study. *Am J Med Genet*. 2001 Dec 8;105(8):690-9.
5. Raymer KA, Waters RF, Price CR. Proposed multigenic Composite Inheritance in major depression. *Medical Hypotheses*. 2005;65(1):158-72.
6. Harold D, Abraham R, Hollingworth P, Sims R, Gerrish A, Hamshere ML, et al. Genome-wide association study identifies variants at CLU and PICALM associated with Alzheimer's disease. *Nat Genet*. 2009 Oct;41(10):1088-93.
7. Haasl R, Ahmadi MR, Meethal S, Gleason C, Johnson S, Asthana S, et al. A luteinizing hormone receptor intronic variant is significantly associated with decreased risk of Alzheimer's disease in males carrying an apolipoprotein E epsilon4 allele. *BMC Medical Genetics*. 2008;9(1):37.
8. Basson J, Wilson A, Haasl R, Atwood C. Multi locus interactions in steroidogenic pathway genes predict Alzheimer's disease. *Alzheimer's and Dementia*. 2008;4(4 (Suppl. 2)):T579: P3-199.
9. Pezawas L, Meyer-Lindenberg A, Goldman AL, Verchinski BA, Chen G, Kolachana BS, et al. Evidence of biologic epistasis between BDNF and SLC6A4 and implications for depression. *Mol Psychiatry*. 2008;13(7):709-16.

**Comment [NR1]:** Note that we have added 1 reference (#13).



- 1  
2  
3  
4  
5  
6  
7  
8  
9 10. Zhang K, Yang C, Xu Y, Sun N, Yang H, Liu J, et al. Genetic association of the interaction between  
10 the BDNF and GSK3B genes and major depressive disorder in a Chinese population. *Journal of Neural*  
11 *Transmission*. 2010;117(3):393-401.  
12  
13  
14 11. Lin E, Hong CJ, Hwang JP, Liou YJ, Yang CH, Cheng D, et al. Gene-gene interactions of the brain-  
15 derived neurotrophic-factor and neurotrophic tyrosine kinase receptor 2 genes in geriatric depression.  
16 *Rejuvenation Res*. 2009;12(6):387-93.  
17  
18 12. Neff CD, Abkevich V, Potter J, Riley R, Shattuck D, Katz DA. Evidence for epistasis between  
19 SLC6A4 and a chromosome 4 gene as risk factors in major depression. *American Journal of Medical*  
20 *Genetics Part B: Neuropsychiatric Genetics*. 2010;153B(1):321-2.  
21  
22 13. Carr D, Khodyakov D. End-of-life health care planning among young-old adults: An assessment of  
23 psychosocial influences. *J Gerontol B-Psychol*. 2007 Mar;62(2):S135-S41.  
24  
25 14. Sewell WH. *As We Age : The Wisconsin Longitudinal Study, 1957-2001*: Center for Demography  
26 and Ecology University of Wisconsin--Madison; 2001.  
27  
28 15. Nelson CB, Kessler RC, Mroczek D. Scoring the World Health Organization's Composite  
29 International Diagnostic Interview Short Form (CIDI-SF; v1.0 NOV98). 1998.  
30  
31 16. Zhang H, Bonney G. Use of classification trees for association studies. *Genet Epidemiol*. 2000  
32 Dec;19(4):323-32.  
33  
34 17. Breiman L, Friedman J, Olshen R, Stone C. *Classification and Regression Trees*. Boca Raton:  
35 Chapman and Hall/CRC; 1984.  
36  
37 18. Therneau T, Atkinson E, editors. Technical Report Series No. 61, *An Introduction to Recursive*  
38 *Partitioning Using the RPART Routines*. Rochester, MN: Department of Health Science Research, Mayo  
39 Clinic; 1997.  
40  
41 19. Accortt EE, Freeman MP, Allen JJB. Women and Major Depressive Disorder: Clinical Perspectives  
42 on Causal Pathways. *Journal of Women's Health*. 2008;17(10):1583-90.  
43  
44  
45  
46  
47  
48  
49  
50  
51  
52

1  
2  
3  
4  
5  
6  
7  
8  
9  
10  
11  
12  
13  
14  
15  
16  
17  
18  
19  
20  
21  
22  
23  
24  
25  
26  
27  
28  
29  
30  
31  
32  
33  
34  
35  
36  
37  
38  
39  
40  
41  
42  
43  
44  
45  
46  
47  
48  
49  
50  
51  
52  
53  
54  
55  
56  
57  
58  
59  
60

20. Kessler RC, McGonagle KA, Swartz M, Blazer DG, Nelson CB. Sex and depression in the National Comorbidity Survey. I: Lifetime prevalence, chronicity and recurrence. *J Affect Disord.* 1993 Oct-Nov;29(2-3):85-96.
21. Kessler RC, McGonagle KA, Nelson CB, Hughes M, Swartz M, Blazer DG. Sex and depression in the National Comorbidity Survey. II: Cohort effects. *J Affect Disord.* 1994 Jan;30(1):15-26.
22. Kessler RC, McGonagle KA, Zhao S, Nelson CB, Hughes M, Eshleman S, et al. Lifetime and 12-month prevalence of DSM-III-R psychiatric disorders in the United States. Results from the National Comorbidity Survey. *Arch Gen Psychiatry.* 1994 Jan;51(1):8-19.
23. Weissman MM, Bland R, Joyce PR, Newman S, Wells JE, Wittchen HU. Sex differences in rates of depression: cross-national perspectives. *J Affect Disord.* 1993 Oct-Nov;29(2-3):77-84.
24. Weissman MM, Olfson M. Depression in women: implications for health care research. *Science.* 1995 Aug 11;269(5225):799-801.
25. Pajer K. New strategies in the treatment of depression in women. *The Journal of clinical psychiatry.* [Review]. 1995;56 Suppl 2:30-7.
26. Paykel ES. Depression in women. *Br J Psychiatry Suppl.* [Review]. 1991 May(10):22-9.
27. Shi M, Weinberg CR. How Much Are We Missing in SNP-by-SNP Analyses of Genome-wide Association Studies? *Epidemiology.* 2011 Nov;22(6):845-7.
28. Lawford BR, Young R, Noble EP, Kann B, Ritchie T. The D2 dopamine receptor (DRD2) gene is associated with co-morbid depression, anxiety and social dysfunction in untreated veterans with post-traumatic stress disorder. *European Psychiatry.* 2006;21(3):180-5.
29. Klimek V, Schenck JE, Han H, Stockmeier CA, Ordway GA. Dopaminergic abnormalities in amygdaloid nuclei in major depression: a postmortem study. *Biol Psychiatry.* 2002 Oct 1;52(7):740-8.
30. Schneier FR, Liebowitz MR, Abi-Dargham A, Zea-Ponce Y, Lin SH, Laruelle M. Low dopamine D(2) receptor binding potential in social phobia. *Am J Psychiatry.* 2000 Mar;157(3):457-9.

- 1  
2  
3  
4  
5  
6  
7  
8  
9 31. Noble EP, Blum K, Ritchie T, Montgomery A, Sheridan PJ. Allelic Association of the D2 Dopamine  
10 Receptor Gene With Receptor-Binding Characteristics in Alcoholism or Gene ism. Arch Gen Psychiatry.  
11 1991 July 1, 1991;48(7):648-54.  
12  
13  
14 32. Thompson J, Thomas N, Singleton A, Piggott M, Lloyd S, Perry EK, et al. D2 dopamine receptor  
15 gene (DRD2) Taq1 A polymorphism: reduced dopamine D2 receptor binding in the human striatum  
16 associated with the A1 allele. Pharmacogenetics. 1997 Dec;7(6):479-84.  
17  
18  
19 33. Pohjalainen T, Rinne JO, Nagren K, Lehtikoinen P, Anttila K, Syvalahti EK, et al. The A1 allele of the  
20 human D2 dopamine receptor gene predicts low D2 receptor availability in healthy volunteers. Mol  
21 Psychiatry. 1998 May;3(3):256-60.  
22  
23  
24 34. Jonsson EG, Nothen MM, Grunhage F, Farde L, Nakashima Y, Propping P, et al. Polymorphisms in  
25 the dopamine D2 receptor gene and their relationships to striatal dopamine receptor density of healthy  
26 volunteers. Mol Psychiatry. 1999 May;4(3):290-6.  
27  
28  
29 35. Hayden EP, Klein DN, Dougherty LR, Olino TM, Lipton RS, Dyson MW, et al. The dopamine D2  
30 receptor gene and depressive and anxious symptoms in childhood: associations and evidence for gene-  
31 environment correlation and gene-environment interaction. Psychiatr Genet. 2010 Dec;20(6):304-10.  
32  
33  
34 36. Dubertret C, Bardel C, Ramoz N, Martin P-M, Deybach J-C, Adès J, et al. A genetic schizophrenia-  
35 susceptibility region located between the ANKK1 and DRD2 genes. Progress in Neuro-  
36 Psychopharmacology and Biological Psychiatry. 2010;34(3):492-9.  
37  
38  
39 37. Kivimaki M, Jokela M, Hamer M, Geddes J, Ebmeier K, Kumari M, et al. Examining Overweight  
40 and Obesity as Risk Factors for Common Mental Disorders Using Fat Mass and Obesity-Associated (FTO)  
41 Genotype-Instrumented Analysis. Am J Epidemiol. 2011 Feb 15;173(4):421-9.  
42  
43  
44 38. Bull SJ, Huezio-Díaz P, Binder EB, Cubells JF, Ranjith G, Maddock C, et al. Functional  
45 polymorphisms in the interleukin-6 and serotonin transporter genes, and depression and fatigue  
46 induced by interferon-alpha and ribavirin treatment. Mol Psychiatry. 2009 Dec;14(12):1095-104.  
47  
48  
49  
50  
51  
52  
53  
54  
55  
56  
57  
58  
59  
60

1  
2  
3  
4  
5  
6  
7  
8  
9  
10  
11  
12  
13  
14  
15  
16  
17  
18  
19  
20  
21  
22  
23  
24  
25  
26  
27  
28  
29  
30  
31  
32  
33  
34  
35  
36  
37  
38  
39  
40  
41  
42  
43  
44  
45  
46  
47  
48  
49  
50  
51  
52  
53  
54  
55  
56  
57  
58  
59  
60

39. Zheng F, Adelsberger H, Muller MR, Fritschy JM, Werner S, Alzheimer C. Activin tunes GABAergic neurotransmission and modulates anxiety-like behavior. *Mol Psychiatry*. 2008;14(3):332-46.

For peer review only

1  
2  
3  
4  
5  
6  
7  
8  
9  
10  
11  
12  
13  
14  
15  
16  
17  
18  
19  
20  
21  
22  
23  
24  
25  
26  
27  
28  
29  
30  
31  
32  
33  
34  
35  
36  
37  
38  
39  
40  
41  
42  
43  
44  
45  
46  
47  
48  
49  
50  
51  
52  
53  
54  
55  
56  
57  
58  
59  
60

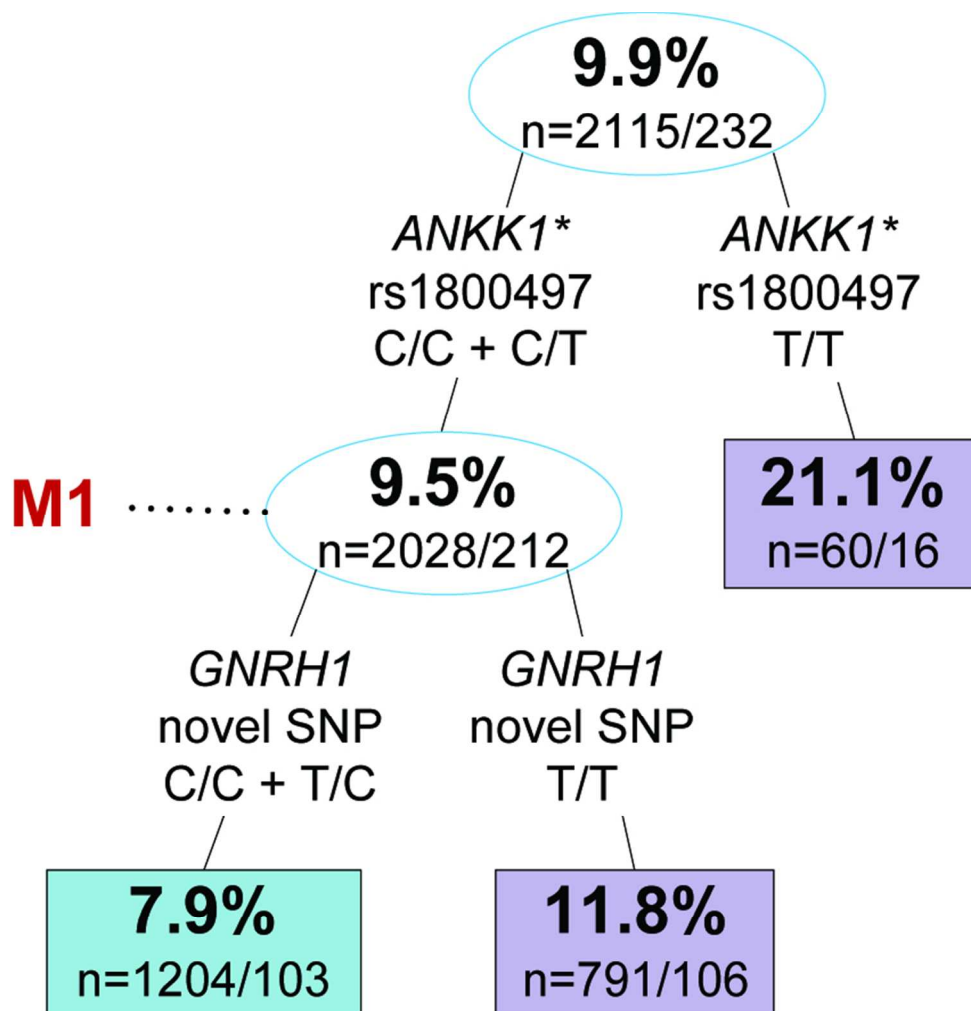

74x74mm (300 x 300 DPI)

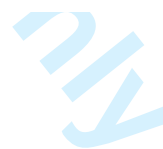

1  
2  
3  
4  
5  
6  
7  
8  
9  
10  
11  
12  
13  
14  
15  
16  
17  
18  
19  
20  
21  
22  
23  
24  
25  
26  
27  
28  
29  
30  
31  
32  
33  
34  
35  
36  
37  
38  
39  
40  
41  
42  
43  
44  
45  
46  
47  
48  
49  
50  
51  
52  
53  
54  
55  
56  
57  
58  
59  
60

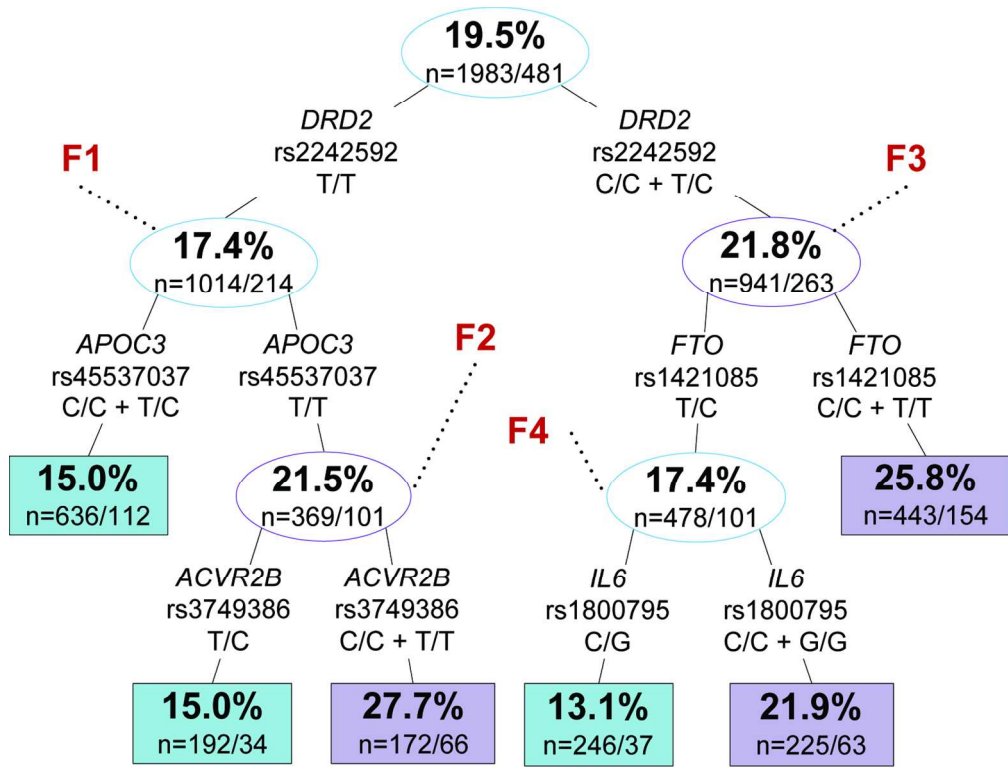

134x102mm (300 x 300 DPI)

Review only

**Supplementary Table 1.** Single Nucleotide Polymorphisms Assessed in the WLS

| Gene              | Encodes                                                             | SNP        | Associated disease/behavior                                                                                                         |
|-------------------|---------------------------------------------------------------------|------------|-------------------------------------------------------------------------------------------------------------------------------------|
| <i>A2M</i>        | alpha-2-macroglobulin                                               | rs669      | Alzheimer's disease (1)                                                                                                             |
| <i>ACVR2A</i>     | activin receptor IIA                                                | rs1424954  | pre-eclampsia (2)                                                                                                                   |
| <i>ACVR2B</i>     | activin receptor IIB                                                | rs3749386  | --                                                                                                                                  |
| <i>ADIPOQ</i>     | adiponectin, C1Q and collagen domain containing                     | rs1501299  | diabetes II (3, 4), obesity (5, 6), breast cancer (7)                                                                               |
| <i>ADIPOQ</i>     | adiponectin, C1Q and collagen domain containing                     | rs2241766  | diabetes II (3, 4), obesity (8), breast cancer (7)                                                                                  |
| <i>ACVRL1</i>     | activin receptor-like kinase 1                                      | rs2071219  | brain arteriovenous malformations (9)                                                                                               |
| <i>APOC-3</i>     | apolipoprotein C-III                                                | rs2854116  | nonalcoholic fatty liver disease (10)                                                                                               |
| <i>ApoE</i>       | apolipoprotein E                                                    | rs429358   | Alzheimer's disease (11, 12)                                                                                                        |
| <i>ApoE</i>       | apolipoprotein E                                                    | rs7412     | Alzheimer's disease (11, 12)                                                                                                        |
| <i>AR</i>         | androgen receptor                                                   | rs6152     | male pattern baldness (13)                                                                                                          |
| <i>BCKDHB</i>     | branched chain keto acid dehydrogenase E1, beta polypeptide         | rs4502885  | premature ovarian failure (14)                                                                                                      |
| <i>BDNF</i>       | brain-derived neurotrophic factor                                   | rs6265     | depression (15-17), alcohol dependence-related depression (18), bipolar disorder (19), schizophrenia (20), cognition (21), BMI (22) |
| <i>BDNF</i>       | brain-derived neurotrophic factor                                   | rs908867   | antidepressant response (23)                                                                                                        |
| <i>BRCA1</i>      | breast cancer 1, early onset                                        | rs1799966  | breast cancer (24)                                                                                                                  |
| <i>BRCA2</i>      | breast cancer 2, early onset homolog                                | rs144848   | breast cancer (24)                                                                                                                  |
| <i>CH25H</i>      | cholesterol 25-hydroxylase                                          | rs3802657  | --                                                                                                                                  |
| <i>CHRM2</i>      | cholinergic receptor, muscarinic 2                                  | rs2061174  | alcohol dependence, depression (25)                                                                                                 |
| <i>CHRM2</i>      | cholinergic receptor, muscarinic 2                                  | rs8191992  | cognition (26)                                                                                                                      |
| <i>COMT</i>       | catechol-O-methyltransferase                                        | rs4680     | ADHD (27), substance abuse (28-31), depression (32), antidepressant response (33), bipolar disorder (34), cognition (35)            |
| <i>CTSD</i>       | cathepsin D                                                         | rs17571    | Alzheimer's disease (36)                                                                                                            |
| <i>CYP11A1</i>    | cytochrome P450, family 11, subfamily A, polypeptide 1              | rs8039957  | breast cancer (37)                                                                                                                  |
| <i>CYP11B2</i>    | cytochrome P450, family 11, subfamily B, polypeptide 2              | rs1799998  | stroke (38), cardiovascular disease (39)                                                                                            |
| <i>DAT1</i>       | human dopamine transporter                                          | rs11564774 | ADHD (40)                                                                                                                           |
| <i>DAT1</i>       | human dopamine transporter                                          | rs2963238  | alcohol-withdrawal seizures (41)                                                                                                    |
| <i>DISC1</i>      | disrupted in schizophrenia 1                                        | rs821616   | schizophrenia (42), cognitive aging (43)                                                                                            |
| <i>DRD2</i>       | dopamine receptor D2                                                | rs17529477 | --                                                                                                                                  |
| <i>DRD2/ANKK1</i> | dopamine receptor D2/ ankyrin repeat and kinase domain containing 1 | rs1800497  | obesity, drug addiction (44)                                                                                                        |
| <i>DRD2</i>       | dopamine receptor D2                                                | rs2242592  | schizophrenia (45)                                                                                                                  |
| <i>DRD2</i>       | dopamine receptor D2                                                | rs4245147  | --                                                                                                                                  |
| <i>DRD2</i>       | dopamine receptor D2                                                | rs6277     | schizophrenia (46), PTSD (47)                                                                                                       |
| <i>DRD4</i>       | dopamine receptor D4                                                | rs1800955  | ADHD (48), heroine addiction (49)                                                                                                   |
| <i>DTNBP1</i>     | dystrobrevin-binding protein 1                                      | rs1018381  | schizophrenia (50), cognitive ability (51)                                                                                          |
| <i>DTNBP1</i>     | dystrobrevin-binding protein 1                                      | rs760761   | schizophrenia (52)                                                                                                                  |
| <i>ESR1</i>       | estrogen receptor 1                                                 | rs7761133  | --                                                                                                                                  |
| <i>ESR1</i>       | estrogen receptor 1                                                 | rs3853248  | --                                                                                                                                  |
| <i>FADS2</i>      | fatty acid desaturase 2                                             | rs1535     | breastfeeding & IQ (53)                                                                                                             |

|    |                |                                             |            |                                                                             |
|----|----------------|---------------------------------------------|------------|-----------------------------------------------------------------------------|
| 1  |                |                                             |            |                                                                             |
| 2  |                |                                             |            |                                                                             |
| 3  | <i>FADS2</i>   | fatty acid desaturase 2                     | rs174575   | breastfeeding & IQ (53)                                                     |
| 4  | <i>FMR1</i>    | fragile X mental retardation 1              | rs1805420  | --                                                                          |
| 5  | <i>FSH</i>     | follicle stimulating hormone                | rs6169     | --                                                                          |
| 6  | <i>FSHR</i>    | follicle stimulating hormone receptor       | rs6166     | sterility (54), osteoporosis (55)                                           |
| 7  | <i>FST</i>     | follicle stimulating hormone receptor       | rs12152850 | --                                                                          |
| 8  | <i>FST</i>     | follicle stimulating hormone receptor       | rs3797297  | --                                                                          |
| 9  | <i>FST</i>     | follicle stimulating hormone receptor       | rs1421085  | obesity (56-58), mental disorders (59)                                      |
| 10 | <i>FTO</i>     | fat mass and obesity associated             | rs1435252  | nicotine addiction (60)                                                     |
| 11 | <i>GABBR2</i>  | γ-aminobutyric acid B receptor 2            | rs2779562  | nicotine addiction (60)                                                     |
| 12 | <i>GABBR2</i>  | γ-aminobutyric acid B receptor 2            | novel SNP  | Alzheimer's disease (61)                                                    |
| 13 | <i>GNRH1</i>   | gonadotropin-releasing hormone              | rs12913832 | eye color (62, 63)                                                          |
| 14 | <i>HERC</i>    | hect domain and RLD 2                       | rs1799945  | hemochromatosis(64)                                                         |
| 15 | <i>HFE</i>     | hemochromatosis                             | rs12602084 | steroid metabolism (65)                                                     |
| 16 | <i>HSD17B1</i> | estradiol 17β-dehydrogenase 1               | rs592389   | vasomotor symptoms (66), cognition (67)                                     |
| 17 | <i>HSD17B1</i> | estradiol 17β-dehydrogenase 1               | rs878567   | mood disorders (68)                                                         |
| 18 | <i>5-HTR1A</i> | 5-hydroxytryptamine (serotonin) receptor 1A | rs6312     | --                                                                          |
| 19 | <i>5-HTR2A</i> | 5-hydroxytryptamine (serotonin) receptor 2A | rs6314     | antidepressant response (69), bipolar disorder (70)                         |
| 20 | <i>5-HTR2A</i> | 5-hydroxytryptamine (serotonin) receptor 2A | rs7997012  | antidepressant response (71)                                                |
| 21 | <i>5-HTR2A</i> | 5-hydroxytryptamine (serotonin) receptor 2A | rs6318     | bipolar disorder (72), depression (73)                                      |
| 22 | <i>5-HTR2C</i> | 5-hydroxytryptamine (serotonin) receptor 2C | rs25533    | antidepressant response (74)                                                |
| 23 | <i>5-HTT</i>   | 5-hydroxytryptamine transporter             | rs8076005  | depressive symptoms (75)                                                    |
| 24 | <i>5-HTT</i>   | 5-hydroxytryptamine transporter             | rs12313279 | --                                                                          |
| 25 | <i>IGF1</i>    | insulin-like growth factor 1                | rs17561    | chronic rhinosinusitis (76), BMI (77)                                       |
| 26 | <i>IL1A</i>    | interleukin 1, alpha                        | rs1800795  | arthritis (78), breast cancer (79), diabetes (80), depression (81)          |
| 27 | <i>IL6</i>     | interleukin 6                               | rs2059693  | testicular cancer (82)                                                      |
| 28 | <i>INHA</i>    | inhibin alpha                               | rs35118453 | --                                                                          |
| 29 | <i>INHA</i>    | inhibin alpha                               | rs2237436  | --                                                                          |
| 30 | <i>INHBA</i>   | inhibin beta A                              | rs11902591 | --                                                                          |
| 31 | <i>INHBB</i>   | inhibin beta B                              | rs17070145 | Alzheimer's disease (83), episodic memory (84)                              |
| 32 | <i>KIBRA</i>   | kidney and brain protein (WWC1)             | rs1137100  | diabetes II (85), atherosclerosis (86)                                      |
| 33 | <i>LEPR</i>    | leptin receptor                             | rs4073366  | Alzheimer's disease (87)                                                    |
| 34 | <i>LHR</i>     | luteinizing hormone receptor                | rs3788862  | pain (88)                                                                   |
| 35 | <i>MAOA</i>    | monoamine oxidase A                         | rs2254298  | autism (89, 90), social loneliness (91), depressive symptoms & anxiety (92) |
| 36 | <i>OXTR</i>    | oxytocin receptor                           | rs707555   | diabetes II (93)                                                            |
| 37 | <i>PCK1</i>    | phosphoenolpyruvate carboxykinase 1         | rs1042838  | ovarian cancer (94), migraine (95), menstruation (96), pregnancy loss (97)  |
| 38 | <i>PGR</i>     | progesterone receptor                       | rs363050   | intelligence (98, 99)                                                       |
| 39 | <i>SNAP25</i>  | synaptosomal-associated protein 25          | rs2760118  | --                                                                          |
| 40 | <i>SSADH</i>   | succinic semialdehyde dehydrogenase         | rs3990403  | --                                                                          |
| 41 | <i>StAR</i>    | steroidogenic acute regulatory protein      | rs1937     | Alzheimer's disease (100)                                                   |
| 42 | <i>TFAM</i>    | transcription factor A, mitochondrial       | rs2306604  | Parkinson's disease (101)                                                   |
| 43 | <i>TFAM</i>    | transcription factor A, mitochondrial       | rs1799913  | heroin addiction (102)                                                      |
| 44 | <i>TPH1</i>    | first tryptophan hydroxylase isoform        |            |                                                                             |
| 45 |                |                                             |            |                                                                             |
| 46 |                |                                             |            |                                                                             |
| 47 |                |                                             |            |                                                                             |
| 48 |                |                                             |            |                                                                             |
| 49 |                |                                             |            |                                                                             |
| 50 |                |                                             |            |                                                                             |
| 51 |                |                                             |            |                                                                             |
| 52 |                |                                             |            |                                                                             |
| 53 |                |                                             |            |                                                                             |
| 54 |                |                                             |            |                                                                             |
| 55 |                |                                             |            |                                                                             |
| 56 |                |                                             |            |                                                                             |
| 57 |                |                                             |            |                                                                             |
| 58 |                |                                             |            |                                                                             |
| 59 |                |                                             |            |                                                                             |
| 60 |                |                                             |            |                                                                             |



TPH2

first tryptophan hydroxylase isoform

rs11178997

bipolar disorder (103), PTSD symptoms  
(104)

## REFERENCES

1. Zappia M, Manna I, Serra P, Cittadella R, Andreoli V, La Russa A, et al. Increased risk for Alzheimer disease with the interaction of MPO and A2M polymorphisms. *Arch Neurol*. 2004 Mar;61(3):341-4.
2. Moses EK, Fitzpatrick E, Freed KA, Dyer TD, Forrest S, Elliott K, et al. Objective prioritization of positional candidate genes at a quantitative trait locus for pre-eclampsia on 2q22. *Molecular Human Reproduction*. 2006 August 2006;12(8):505-12.
3. Hara K, Boutin P, Mori Y, Tobe K, Dina C, Yasuda K, et al. Genetic Variation in the Gene Encoding Adiponectin Is Associated With an Increased Risk of Type 2 Diabetes in the Japanese Population. *Diabetes*. 2002 February 1, 2002;51(2):536-40.
4. Gu HF, Abulaiti A, Ostenson CG, Humphreys K, Wahlestedt C, Brookes AJ, et al. Single nucleotide polymorphisms in the proximal promoter region of the adiponectin (APM1) gene are associated with type 2 diabetes in Swedish caucasians. *Diabetes*. 2004 Feb;53 Suppl 1:S31-5.
5. Bouatia-Naji N, Meyre D, Lobbens S, Seron K, Fumeron F, Balkau B, et al. ACDC/adiponectin polymorphisms are associated with severe childhood and adult obesity. *Diabetes*. 2006 Feb;55(2):545-50.
6. Yang W-S, Yang Y-C, Chen C-L, Wu I-L, Lu J-Y, Lu F-H, et al. Adiponectin SNP276 is associated with obesity, the metabolic syndrome, and diabetes in the elderly. *The American Journal of Clinical Nutrition*. 2007 August 1, 2007;86(2):509-13.
7. Kaklamani VG, Sadim M, Hsi A, Offit K, Oddoux C, Ostrer H, et al. Variants of the adiponectin and adiponectin receptor 1 genes and breast cancer risk. *Cancer Res*. 2008 May 1;68(9):3178-84.
8. Beckers S, Peeters AV, De Freitas F, Mertens IL, Verhulst SL, Haentjens D, et al. Association Study and Mutation Analysis of Adiponectin Shows Association of Variants in APM1 with Complex Obesity in Women. *Annals of Human Genetics*. 2009;73(5):492-501.
9. Young WL, Kwok P-Y, Pawlikowska L, Lawton MT, Kim H, Hysi PG, et al. Arteriovenous Malformation. *Journal of Neurosurgery*. 2007;106(4):731-2.
10. Petersen KF, Dufour S, Hariri A, Nelson-Williams C, Foo JN, Zhang X-M, et al. Apolipoprotein C3 Gene Variants in Nonalcoholic Fatty Liver Disease. *New England Journal of Medicine*. 2010;362(12):1082-9.
11. Corder EH, Saunders AM, Strittmatter WJ, Schmechel DE, Gaskell PC, Small GW, et al. Gene dose of apolipoprotein E type 4 allele and the risk of Alzheimer's disease in late onset families. *Science*. 1993;261(5123):921-3.
12. Saunders AM, Strittmatter WJ, Schmechel D, George-Hyslop PH, Pericak-Vance MA, Joo SH, et al. Association of apolipoprotein E allele epsilon 4 with late-onset familial and sporadic Alzheimer's disease. *Neurology*. 1993;43(8):1467-72.
13. Ellis JA, Stebbing M, Harrap SB. Polymorphism of the Androgen Receptor Gene is Associated with Male Pattern Baldness. 2001;116(3):452-5.
14. Kang H, Lee SK, Cho S-W, Lee S-H, Kwack K. Branched chain [alpha]-keto acid dehydrogenase, E1-[beta] subunit gene is associated with premature ovarian failure. *Fertility and Sterility*. 2008;89(3):728-31.

15. Hwang J-P, Tsai S-J, Hong C-J, Yang C-H, Lirng J-F, Yang Y-M. The Val66Met polymorphism of the brain-derived neurotrophic-factor gene is associated with geriatric depression. *Neurobiology of Aging*. 2006;27(12):1834-7.
16. Czira ME, Wersching H, Baune BT, Berger K. Brain-derived neurotrophic factor gene polymorphisms, neurotransmitter levels, and depressive symptoms in an elderly population. *Age (Dordr)*. 2011 Sep 7.
17. Suchanek R, Owczarek A, Kowalczyk M, Kucia K, Kowalski J. Association between C-281A and val66met functional polymorphisms of BDNF gene and risk of recurrent major depressive disorder in Polish population. *J Mol Neurosci*. 2011 Mar;43(3):524-30.
18. Su N, Zhang L, Fei F, Hu H, Wang K, Hui H, et al. The brain-derived neurotrophic factor is associated with alcohol dependence-related depression and antidepressant response. *Brain Research*. 2011;1415(0):119-26.
19. Sears C, Markie D, Olds R, Fitches A. Evidence of associations between bipolar disorder and the brain-derived neurotrophic factor (BDNF) gene. *Bipolar Disorders*. 2011;13(7-8):630-7.
20. Zakharyan R, Boyajyan A, Arakelyan A, Gevorgyan A, Mrazek F, Petrek M. Functional variants of the genes involved in neurodevelopment and susceptibility to schizophrenia in an Armenian population. *Human Immunology*. 2011;72(9):746-8.
21. McAllister TW, Tyler AL, Flashman LA, Rhodes CH, McDonald BC, Saykin AJ, et al. Polymorphisms in the brain-derived neurotrophic factor gene influence memory and processing speed one month after brain injury. *J Neurotrauma*. 2012 Apr 10;29(6):1111-8.
22. Hong K-W, Lim J-E, Go MJ, Shin Cho Y, Ahn Y, Han B-G, et al. Recapitulation of the Association of the Val66Met Polymorphism of BDNF Gene With BMI in Koreans. *Obesity*. 2011.
23. Gratacos M, Soria V, Urretavizcaya M, Gonzalez JR, Crespo JM, Bayes M, et al. A brain-derived neurotrophic factor (BDNF) haplotype is associated with antidepressant treatment outcome in mood disorders. *Pharmacogenomics J*. 2007;8(2):101-12.
24. Johnson N, Fletcher O, Palles C, Rudd M, Webb E, Sellick G, et al. Counting potentially functional variants in BRCA1, BRCA2 and ATM predicts breast cancer susceptibility. *Human Molecular Genetics*. 2007 May 1, 2007;16(9):1051-7.
25. Wang JC, Hinrichs AL, Stock H, Budde J, Allen R, Bertelsen S, et al. Evidence of common and specific genetic effects: association of the muscarinic acetylcholine receptor M2 (CHRM2) gene with alcohol dependence and major depressive syndrome. *Human Molecular Genetics*. 2004 September 1, 2004;13(17):1903-11.
26. Jones KA, Porjesz B, Almasy L, Bierut L, Goate A, Wang JC, et al. Linkage and linkage disequilibrium of evoked EEG oscillations with CHRM2 receptor gene polymorphisms: implications for human brain dynamics and cognition. *International Journal of Psychophysiology*. 2004;53(2):75-90.
27. Eisenberg J, Mei-Tal G, Steinberg A, Tartakovsky E, Zohar A, Gritsenko I, et al. Haplotype relative risk study of catechol-O-methyltransferase (COMT) and attention deficit hyperactivity disorder (ADHD): Association of the high-enzyme activity val allele with adhd impulsive-hyperactive phenotype. *American Journal of Medical Genetics*. 1999;88(5):497-502.
28. Wang T, Franke P, Neidt H, Cichon S, Knapp M, Lichtermann D, et al. Association study of the low-activity allele of catechol-O-methyltransferase and alcoholism using a family-based approach. *Mol Psychiatry*. 2001 Jan;6(1):109-11.
29. Horowitz R, Kotler M, Shufman E, Aharoni S, Kremer I, Cohen H, et al. Confirmation of an excess of the high enzyme activity COMT val allele in heroin addicts in a family-based haplotype relative risk study. *American Journal of Medical Genetics*. 2000;96(5):599-603.

- 1
  - 2
  - 3
  - 4
  - 5
  - 6
  - 7
  - 8
  - 9
  - 10
  - 11
  - 12
  - 13
  - 14
  - 15
  - 16
  - 17
  - 18
  - 19
  - 20
  - 21
  - 22
  - 23
  - 24
  - 25
  - 26
  - 27
  - 28
  - 29
  - 30
  - 31
  - 32
  - 33
  - 34
  - 35
  - 36
  - 37
  - 38
  - 39
  - 40
  - 41
  - 42
  - 43
  - 44
  - 45
  - 46
  - 47
  - 48
  - 49
  - 50
  - 51
  - 52
  - 53
  - 54
  - 55
  - 56
  - 57
  - 58
  - 59
  - 60
30. Vandenberg DJ, Rodriguez LA, Miller IT, Uhl GR, Lachman HM. High-activity catechol-O-methyltransferase allele is more prevalent in polysubstance abusers. *American Journal of Medical Genetics*. 1997;74(4):439-42.
31. Li T, Chen C-k, Hu X, Ball D, Lin S-K, Chen W, et al. Association analysis of the DRD4 and COMT genes in methamphetamine abuse. *American Journal of Medical Genetics Part B: Neuropsychiatric Genetics*. 2004;129B(1):120-4.
32. Åberg E, Fandiño-Losada A, Sjöholm LK, Forsell Y, Lavebratt C. The functional Val158Met polymorphism in catechol-O-methyltransferase (COMT) is associated with depression and motivation in men from a Swedish population-based study. *Journal of Affective Disorders*. 2011;129(1-3):158-66.
33. Baune BT, Hohoff C, Berger K, Neumann A, Mortensen S, Roehrs T, et al. Association of the COMT val158met Variant with Antidepressant Treatment Response in Major Depression. *Neuropsychopharmacology*. 2007;33(4):924-32.
34. Lee S-Y, Chen S-L, Chen S-H, Huang S-Y, Tzeng N-S, Chang Y-H, et al. The COMT and DRD3 genes interacted in bipolar I but not bipolar II disorder. *World Journal of Biological Psychiatry*. 2011;12(5):385-91.
35. Dickinson D, Elvevåg B. Genes, cognition and brain through a COMT lens. *Neuroscience*. 2009;164(1):72-87.
36. Albayrak Ö, Tirniceriu A, Riemenschneider M, Kurz A, Scherag A, Egensperger R. The Cathepsin D (224C/T) Polymorphism Confers an Increased Risk to Develop Alzheimer's Disease in Men. *The Journals of Gerontology Series A: Biological Sciences and Medical Sciences*. 2010 March 1, 2010;65A(3):219-24.
37. Yaspan BL, Breyer JP, Cai Q, Dai Q, Elmore JB, Amundson I, et al. Haplotype Analysis of CYP11A1 Identifies Promoter Variants Associated with Breast Cancer Risk. *Cancer Research*. 2007 June 15, 2007;67(12):5673-82.
38. Tu Y, Cui G, Xu Y, Bao X, Wang X, Wang D. Genetic polymorphism of CYP11B2 gene and stroke in the Han Chinese population and a meta-analysis. *Pharmacogenet Genomics*. 2011;21(3):115-20.
39. White PC, Hautanen A, Kupari M. Aldosterone synthase (CYP11B2) polymorphisms and cardiovascular function. *J Steroid Biochem Mol Biol*. 1999;69(1-6):409-12.
40. Brookes K, Xu X, Chen W, Zhou K, Neale B, Lowe N, et al. The analysis of 51 genes in DSM-IV combined type attention deficit hyperactivity disorder: association signals in DRD4, DAT1 and 16 other genes. *Mol Psychiatry*. 2006;11(10):934-53.
41. Le Strat Y, Ramoz N, Pickering P, Burger V, Boni C, Aubin H-J, et al. The 3' Part of the Dopamine Transporter Gene DAT1/SLC6A3 Is Associated With Withdrawal Seizures in Patients With Alcohol Dependence. *Alcoholism: Clinical and Experimental Research*. 2008;32(1):27-35.
42. Callicott JH, Straub RE, Pezawas L, Egan MF, Mattay VS, Hariri AR, et al. Variation in DISC1 affects hippocampal structure and function and increases risk for schizophrenia. *Proc Natl Acad Sci U S A*. 2005;102(24):8627-32.
43. Thomson PA, Harris SE, Starr JM, Whalley LJ, Porteous DJ, Deary IJ. Association between genotype at an exonic SNP in DISC1 and normal cognitive aging. *Neuroscience Letters*. 2005;389(1):41-5.
44. Blum K, Braverman ER, Wood RC, Gill J, Li C, Chen TJ, et al. Increased prevalence of the Taq I A1 allele of the dopamine receptor gene (DRD2) in obesity with comorbid substance use disorder: a preliminary report. *Pharmacogenetics*. 1996 Aug;6(4):297-305.
45. Dubertret C, Bardel C, Ramoz N, Martin P-M, Deybach J-C, Adès J, et al. A genetic schizophrenia-susceptibility region located between the ANKK1 and DRD2 genes. *Progress in Neuro-Psychopharmacology and Biological Psychiatry*. 2010;34(3):492-9.
46. Monakhov M, Golimbet V, Abramova L, Kaleda V, Karpov V. Association study of three polymorphisms in the dopamine D2 receptor gene and schizophrenia in the Russian population. *Schizophrenia Research*. 2008;100(1-3):302-7.

- 1  
2  
3  
4  
5  
6  
7  
8  
9  
10  
11  
12  
13  
14  
15  
16  
17  
18  
19  
20  
21  
22  
23  
24  
25  
26  
27  
28  
29  
30  
31  
32  
33  
34  
35  
36  
37  
38  
39  
40  
41  
42  
43  
44  
45  
46  
47  
48  
49  
50  
51  
52  
53  
54  
55  
56  
57  
58  
59  
60
47. Voisey J, Swagell CD, Hughes IP, Morris CP, van Daal A, Noble EP, et al. The DRD2 gene 957C>T polymorphism is associated with Posttraumatic Stress Disorder in war veterans. *Depression and Anxiety*. 2009;26(1):28-33.
  48. Yang J-W, Jang W-S, Hong SD, Ji YI, Kim DH, Park J, et al. A case-control association study of the polymorphism at the promoter region of the DRD4 gene in Korean boys with attention deficit-hyperactivity disorder: Evidence of association with the - 521 C/T SNP. *Progress in Neuro-Psychopharmacology and Biological Psychiatry*. 2008;32(1):243-8.
  49. Lai JH, Zhu YS, Huo ZH, Sun RF, Yu B, Wang YP, et al. Association study of polymorphisms in the promoter region of DRD4 with schizophrenia, depression, and heroin addiction. *Brain Research*. 2010;1359:227-32.
  50. Funke B, Finn CT, Plocik AM, Lake S, DeRosse P, Kane JM, et al. Association of the DTNBP1 Locus with Schizophrenia in a U.S. Population. *The American Journal of Human Genetics*. 2004;75(5):891-8.
  51. Burdick KE, Lencz T, Funke B, Finn CT, Szeszko PR, Kane JM, et al. Genetic variation in DTNBP1 influences general cognitive ability. *Human Molecular Genetics*. 2006 15 May 2006;15(10):1563-8.
  52. Riley B, Kuo P-H, Maher BS, Fanous AH, Sun J, Wormley B, et al. The dystrobrevin binding protein 1 (DTNBP1) gene is associated with schizophrenia in the Irish Case Control Study of Schizophrenia (ICCS) sample. *Schizophrenia Research*. 2009;115(2-3):245-53.
  53. Caspi A, Williams B, Kim-Cohen J, Craig IW, Milne BJ, Poulton R, et al. Moderation of breastfeeding effects on the IQ by genetic variation in fatty acid metabolism. *Proc Natl Acad Sci U S A*. 2007 Nov 20;104(47):18860-5.
  54. Binder H, Dittrich R, Hager I, Muller A, Oeser S, Beckmann MW, et al. Association of FSH receptor and CYP19A1 gene variations with sterility and ovarian hyperstimulation syndrome. *Reproduction*. 2008;135(1):107-16.
  55. Rendina D, Gianfrancesco F, De Filippo G, Merlotti D, Esposito T, Mingione A, et al. FSHR gene polymorphisms influence bone mineral density and bone turnover in postmenopausal women. *Eur J Endocrinol*. 2010;163(1):165-72.
  56. Dina C, Meyre D, Gallina S, Durand E, Korner A, Jacobson P, et al. Variation in FTO contributes to childhood obesity and severe adult obesity. *Nat Genet*. 2007;39(6):724-6.
  57. Tung Y-CL, Yeo GSH. From GWAS to biology: lessons from FTO. *Annals of the New York Academy of Sciences*. 2011;1220(1):162-71.
  58. Chabris C, Hebert B, Benjamin D, Beauchamp J, Cesarini D, van der Loos M, et al. Most reported genetic associations with general intelligence are probably false positives. *Psychological Science*. 2011;In press.
  59. Kivimaki M, Jokela M, Hamer M, Geddes J, Ebmeier K, Kumari M, et al. Examining Overweight and Obesity as Risk Factors for Common Mental Disorders Using Fat Mass and Obesity-Associated (FTO) Genotype-Instrumented Analysis. *Am J Epidemiol*. 2011 Feb 15;173(4):421-9.
  60. Beuten J, Ma JZ, Payne TJ, Dupont RT, Crews KM, Somes G, et al. Single- and Multilocus Allelic Variants within the GABAB Receptor Subunit 2 (GABAB2) Gene Are Significantly Associated with Nicotine Dependence. *The American Journal of Human Genetics*. 2005;76(5):859-64.
  61. Wilson AC. Investigations into gonadotropin-releasing hormone receptor signaling in extrahypothalamic neurons of the brain: Implications for normal cognition and the pathogenesis of Alzheimer's disease: Thesis. University of Wisconsin, Madison, USA; 2009.
  62. Eiberg H, Troelsen J, Nielsen M, Mikkelsen A, Mengel-From J, Kjaer K, et al. Blue eye color in humans may be caused by a perfectly associated founder mutation in a regulatory element located within the HERC2 gene inhibiting OCA2 expression. *Human Genetics*. 2008;123(2):177-87.

- 1  
2  
3  
4  
5  
6  
7  
8  
9  
10  
11  
12  
13  
14  
15  
16  
17  
18  
19  
20  
21  
22  
23  
24  
25  
26  
27  
28  
29  
30  
31  
32  
33  
34  
35  
36  
37  
38  
39  
40  
41  
42  
43  
44  
45  
46  
47  
48  
49  
50  
51  
52  
53  
54  
55  
56  
57  
58  
59  
60
63. Sturm RA, Duffy DL, Zhao ZZ, Leite FPN, Stark MS, Hayward Nicholas K, et al. A Single SNP in an Evolutionary Conserved Region within Intron 86 of the HERC2 Gene Determines Human Blue-Brown Eye Color. *The American Journal of Human Genetics*. 2008;82(2):424-31.
64. Beutler E. The significance of the 187G (H63D) mutation in hemochromatosis. *Am J Hum Genet*. 1997 Sep;61(3):762-4.
65. Sun T, Oh WK, Jacobus S, Regan M, Pomerantz M, Freedman ML, et al. The Impact of Common Genetic Variations in Genes of the Sex Hormone Metabolic Pathways on Steroid Hormone Levels and Prostate Cancer Aggressiveness. *Cancer Prevention Research*. 2011 December 1, 2011;4(12):2044-50.
66. Crandall CJ, Crawford SL, Gold EB. Vasomotor Symptom Prevalence Is Associated with Polymorphisms in Sex Steroid-Metabolizing Enzymes and Receptors. *The American Journal of Medicine*. 2006;119(9, Supplement 1):S52-S60.
67. Kravitz HM, Meyer PM, Seeman TE, Greendale GA, Sowers MR. Cognitive Functioning and Sex Steroid Hormone Gene Polymorphisms in Women at Midlife. *The American Journal of Medicine*. 2006;119(9, Supplement 1):S94-S102.
68. Brezo J, Bureau A, Merette C, Jomphe V, Barker ED, Vitaro F, et al. Differences and similarities in the serotonergic diathesis for suicide attempts and mood disorders: a 22-year longitudinal gene-environment study. *Mol Psychiatry*. 2010;15(8):831-43.
69. Wilkie MJV, Smith G, Day RK, Matthews K, Smith D, Blackwood D, et al. Polymorphisms in the SLC6A4 and HTR2A genes influence treatment outcome following antidepressant therapy. *Pharmacogenomics J*. 2008;9(1):61-70.
70. McAuley EZ, Fullerton JM, Blair IP, Donald JA, Mitchell PB, Schofield PR. Association between the serotonin 2A receptor gene and bipolar affective disorder in an Australian cohort. *Psychiatr Genet*. 2009 Oct;19(5):244-52.
71. McMahon FJ, Buervenich S, Charney D, Lipsky R, Rush AJ, Wilson AF, et al. Variation in the Gene Encoding the Serotonin 2A Receptor Is Associated with Outcome of Antidepressant Treatment. *The American Journal of Human Genetics*. 2006;78(5):804-14.
72. Mazza M, Mandelli L, Martinotti G, Di Nicola M, Tavian D, Negri G, et al. Further evidence supporting the association between 5HTR2C gene and bipolar disorder. *Psychiatry Res*. 2010 Dec 30;180(2-3):151-2.
73. Lerer B, Macciardi F, Segman RH, Adolfsson R, Blackwood D, Blairy S, et al. Variability of 5-HT2C receptor cys23ser polymorphism among European populations and vulnerability to affective disorder. *Mol Psychiatry*. 2001 Sep;6(5):579-85.
74. Lin E, Chen PS, Chang HH, Gean P-W, Tsai HC, Yang YK, et al. Interaction of serotonin-related genes affects short-term antidepressant response in major depressive disorder. *Progress in Neuro-Psychopharmacology and Biological Psychiatry*. 2009;33(7):1167-72.
75. Su S, Zhao J, Bremner JD, Miller AH, Tang W, Bouzyk M, et al. Serotonin Transporter Gene, Depressive Symptoms, and Interleukin-6 / CLINICAL PERSPECTIVE. *Circulation: Cardiovascular Genetics*. 2009 December 1, 2009;2(6):614-20.
76. Mfuna Endam L, Cormier C, Bosse Y, Filali-Mouhim A, Desrosiers M. Association of IL1A, IL1B, and TNF Gene Polymorphisms With Chronic Rhinosinusitis With and Without Nasal Polyposis: A Replication Study. *Arch Otolaryngol Head Neck Surg*. 2010 February 1, 2010;136(2):187-92.
77. Um J-Y, Rim H-K, Kim S-J, Kim H-L, Hong S-H. Functional Polymorphism of IL-1 Alpha and Its Potential Role in Obesity in Humans and Mice. *PLoS ONE*. 2011;6(12):e29524.
78. Fishman D, Faulds G, Jeffery R, Mohamed-Ali V, Yudkin JS, Humphries S, et al. The effect of novel polymorphisms in the interleukin-6 (IL-6) gene on IL-6 transcription and plasma IL-6 levels, and an association with systemic-onset juvenile chronic arthritis. *The Journal of Clinical Investigation*. 1998;102(7):1369-76.

- 1  
2  
3 79. Slattery ML, Curtin K, Sweeney C, Wolff RK, Baumgartner RN, Baumgartner KB, et al. Modifying  
4 Effects of IL-6 Polymorphisms on Body Size-Associated Breast Cancer Risk. *Obesity*. 2008;16(2):339-47.  
5 80. Huth C, Heid IM, Vollmert C, Gieger C, Grallert H, Wolford JK, et al. IL6 Gene Promoter  
6 Polymorphisms and Type 2 Diabetes. *Diabetes*. 2006 October 2006;55(10):2915-21.  
7 81. Bull SJ, Huezo-Diaz P, Binder EB, Cubells JF, Ranjith G, Maddock C, et al. Functional  
8 polymorphisms in the interleukin-6 and serotonin transporter genes, and depression and fatigue  
9 induced by interferon-alpha and ribavirin treatment. *Mol Psychiatry*. 2009 Dec;14(12):1095-104.  
10 82. Purdue MP, Graubard BI, Chanock SJ, Rubertone MV, Erickson RL, McGlynn KA. Genetic  
11 Variation in the Inhibin Pathway and Risk of Testicular Germ Cell Tumors. *Cancer Research*. 2008 April  
12 15, 2008;68(8):3043-8.  
13 83. Rodríguez-Rodríguez E, Infante J, Llorca J, Mateo I, Sánchez-Quintana C, García-Gorostiaga I, et  
14 al. Age-dependent association of KIBRA genetic variation and Alzheimer's disease risk. *Neurobiology of*  
15 *Aging*. 2009;30(2):322-4.  
16 84. Almeida OP, Schwab SG, Lautenschlager NT, Morar B, Greenop KR, Flicker L, et al. KIBRA genetic  
17 polymorphism influences episodic memory in later life, but does not increase the risk of mild cognitive  
18 impairment. *Journal of Cellular and Molecular Medicine*. 2008;12(5a):1672-6.  
19 85. Salopuro T, Pulkkinen L, Lindstrom J, Eriksson JG, Valle TT, Hamalainen H, et al. Genetic variation  
20 in leptin receptor gene is associated with type 2 diabetes and body weight: The Finnish Diabetes  
21 Prevention Study. *Int J Obes Relat Metab Disord*. 2005;29(10):1245-51.  
22 86. Saukko M, Kesaniemi YA, Ukkola O. Leptin receptor Lys109Arg and Gln223Arg polymorphisms  
23 are associated with early atherosclerosis. *Metab Syndr Relat Disord*. 2010;8(5):425-30.  
24 87. Haasl R, Ahmadi MR, Meethal S, Gleason C, Johnson S, Asthana S, et al. A luteinizing hormone  
25 receptor intronic variant is significantly associated with decreased risk of Alzheimer's disease in males  
26 carrying an apolipoprotein E epsilon4 allele. *BMC Medical Genetics*. 2008;9(1):37.  
27 88. Kim H, Lee H, Rowan J, Brahim J, Dionne R. Genetic polymorphisms in monoamine  
28 neurotransmitter systems show only weak association with acute post-surgical pain in humans.  
29 *Molecular Pain*. 2006;2(1):24.  
30 89. Lerer E, Levi S, Salomon S, Darvasi A, Yirmiya N, Ebstein RP. Association between the oxytocin  
31 receptor (OXTR) gene and autism: relationship to Vineland Adaptive Behavior Scales and cognition. *Mol*  
32 *Psychiatry*. 2007;13(10):980-8.  
33 90. Liu X, Kawamura Y, Shimada T, Otowa T, Koishi S, Sugiyama T, et al. Association of the oxytocin  
34 receptor (OXTR) gene polymorphisms with autism spectrum disorder (ASD) in the Japanese population. *J*  
35 *Hum Genet*. 2010;55(3):137-41.  
36 91. Lucht MJ, Barnow S, Sonnenfeld C, Rosenberger A, Grabe HJ, Schroeder W, et al. Associations  
37 between the oxytocin receptor gene (OXTR) and affect, loneliness and intelligence in normal subjects.  
38 *Progress in Neuro-Psychopharmacology and Biological Psychiatry*. 2009;33(5):860-6.  
39 92. Thompson RJ, Parker KJ, Hallmayer JF, Waugh CE, Gotlib IH. Oxytocin receptor gene  
40 polymorphism (rs2254298) interacts with familial risk for psychopathology to predict symptoms of  
41 depression and anxiety in adolescent girls. *Psychoneuroendocrinology*. 2011;36(1):144-7.  
42 93. Dong Y, Zhang H, Wang X, Feng Q, Chen X, Su Q. A Leu184Val polymorphism in PCK1 gene is  
43 associated with type 2 diabetes in Eastern Chinese population with BMI < 23 kg/m<sup>2</sup>. *Diabetes Research*  
44 *and Clinical Practice*. 2009;83(2):227-32.  
45 94. Pearce CL, Hirschhorn JN, Wu AH, Burt NP, Stram DO, Young S, et al. Clarifying the PROGENS  
46 Allele Association in Ovarian and Breast Cancer Risk: A Haplotype-Based Analysis. *Journal of the National*  
47 *Cancer Institute*. 2005 January 5, 2005;97(1):51-9.  
48  
49  
50  
51  
52  
53  
54  
55  
56  
57  
58  
59  
60

- 1  
2  
3  
4  
5  
6  
7  
8  
9  
10  
11  
12  
13  
14  
15  
16  
17  
18  
19  
20  
21  
22  
23  
24  
25  
26  
27  
28  
29  
30  
31  
32  
33  
34  
35  
36  
37  
38  
39  
40  
41  
42  
43  
44  
45  
46  
47  
48  
49  
50  
51  
52  
53  
54  
55  
56  
57  
58  
59  
60
95. Joshi G, Pradhan S, Mittal B. Role of the oestrogen receptor (ESR1 PvuII and ESR1 325 C→G) and progesterone receptor (PROGINS) polymorphisms in genetic susceptibility to migraine in a North Indian population. *Cephalalgia*. 2010 March 1, 2010;30(3):311-20.
96. Taylor KC, Small CM, Epstein MP, Sherman SL, Tang W, Wilson MM, et al. Associations of Progesterone Receptor Polymorphisms with Age at Menarche and Menstrual Cycle Length. *Hormone Research in Paediatrics*. 2010;74(6):421-7.
97. Su MT, Lee IW, Chen YC, Kuo PL. Association of progesterone receptor polymorphism with idiopathic recurrent pregnancy loss in Taiwanese Han population. *J Assist Reprod Genet*. 2011 Mar;28(3):239-43.
98. Gosso MF, de Geus EJC, van Belzen MJ, Polderman TJC, Heutink P, Boomsma DI, et al. The SNAP-25 gene is associated with cognitive ability: evidence from a family-based study in two independent Dutch cohorts. *Mol Psychiatry*. 2006;11(9):878-86.
99. Gosso MF, De Geus EJC, Polderman TJC, Boomsma DI, Heutink P, Posthuma D. Common variants underlying cognitive ability: further evidence for association between the SNAP-25 gene and cognition using a family-based study in two independent Dutch cohorts. *Genes, Brain and Behavior*. 2008;7(3):355-64.
100. Zhang Q, Yu J-T, Wang P, Chen W, Wu Z-C, Jiang H, et al. Mitochondrial transcription factor A (TFAM) polymorphisms and risk of late-onset Alzheimer's disease in Han Chinese. *Brain Research*. 2011;1368(0):355-60.
101. Gaweda-Walerych K, Safranow K, Maruszak A, Bialecka M, Klodowska-Duda G, Czyzewski K, et al. Mitochondrial transcription factor A variants and the risk of Parkinson's disease. *Neuroscience Letters*. 2010;469(1):24-9.
102. Nielsen DA, Barral S, Proudnikov D, Kellogg S, Ho A, Ott J, et al. TPH2 and TPH1: association of variants and interactions with heroin addiction. *Behav Genet*. 2008 Mar;38(2):133-50.
103. Cichon S, Winge I, Mattheisen M, Georgi A, Karpushova A, Freudenberg J, et al. Brain-specific tryptophan hydroxylase 2 (TPH2): a functional Pro206Ser substitution and variation in the 5'-region are associated with bipolar affective disorder. *Human Molecular Genetics*. 2008 January 1, 2008;17(1):87-97.
104. Goenjian AK, Bailey JN, Walling DP, Steinberg AM, Schmidt D, Dandekar U, et al. Association of TPH1, TPH2, and 5HTTLPR with PTSD and depressive symptoms. *Journal of Affective Disorders*. 2012(in Press).

1  
2  
3  
4  
5  
6  
7  
8  
9  
10  
11  
12  
13  
14  
15  
16  
17  
18  
19  
20  
21  
22  
23  
24  
25  
26  
27  
28  
29  
30  
31  
32  
33  
34  
35  
36  
37  
38  
39  
40  
41  
42  
43  
44  
45  
46  
47  
48  
49

**Supplementary Table 2.** Depression-Associated SNP Identified in the WLS

| Gene              | Encodes                                                            | SNP       | Alleles | Chr#/Location      | Residue   | Associated disease/behavior                                        |
|-------------------|--------------------------------------------------------------------|-----------|---------|--------------------|-----------|--------------------------------------------------------------------|
| <i>ACVR2B</i>     | activin receptor IIB                                               | rs3749386 | T/C     | 3/intron 1         | --        | left-right axis malformations*(1)                                  |
| <i>APOC3</i>      | apolipoprotein C-III                                               | rs2854116 | T/C     | 11/promoter (-455) | --        | nonalcoholic fatty liver disease(2)                                |
| <i>DRD2/ANKK1</i> | dopamine receptor D2/ankyrin repeat and kinase domain containing 1 | rs1800497 | C/T     | 11/exon (ANKK1)    | Glu713Lys | obesity, drug addiction (3)                                        |
| <i>DRD2</i>       | dopamine receptor D2                                               | rs2242592 | T/C     | 11/3'              | --        | schizophrenia (4)                                                  |
| <i>FTO</i>        | fat mass and obesity associated                                    | rs1421085 | T/C     | 16/intron 1        | --        | obesity (5-7), mental disorders (8)                                |
| <i>GNRH1</i>      | gonadotropin-releasing hormone                                     | novel SNP | T/C     | 8/promoter         | --        | Alzheimer's disease (9)                                            |
| <i>IL6</i>        | interleukin 6                                                      | rs1800795 | C/G     | 7/promoter (-174)  | --        | arthritis (10), breast cancer (11), diabetes (12), depression (13) |

Gene association only

Peer review only



## References

1. Kosaki R, Gebbia M, Kosaki K, Lewin M, Bowers P, Towbin JA, et al. Left–right axis malformations associated with mutations in ACVR2B, the gene for human activin receptor type IIB. *American Journal of Medical Genetics*. 1999;82(1):70-6.
2. Petersen KF, Dufour S, Hariri A, Nelson-Williams C, Foo JN, Zhang X-M, et al. Apolipoprotein C3 Gene Variants in Nonalcoholic Fatty Liver Disease. *New England Journal of Medicine*. 2010;362(12):1082-9.
3. Blum K, Braverman ER, Wood RC, Gill J, Li C, Chen TJ, et al. Increased prevalence of the Taq I A1 allele of the dopamine receptor gene (DRD2) in obesity with comorbid substance use disorder: a preliminary report. *Pharmacogenetics*. 1996 Aug;6(4):297-305.
4. Dubertret C, Bardel C, Ramoz N, Martin P-M, Deybach J-C, Adès J, et al. A genetic schizophrenia-susceptibility region located between the ANKK1 and DRD2 genes. *Progress in Neuro-Psychopharmacology and Biological Psychiatry*. 2010;34(3):492-9.
5. Dina C, Meyre D, Gallina S, Durand E, Korner A, Jacobson P, et al. Variation in FTO contributes to childhood obesity and severe adult obesity. *Nat Genet*. 2007;39(6):724-6.
6. Tung Y-CL, Yeo GSH. From GWAS to biology: lessons from FTO. *Annals of the New York Academy of Sciences*. 2011;1220(1):162-71.
7. Chabris C, Hebert B, Benjamin D, Beauchamp J, Cesarini D, van der Loos M, et al. Most reported genetic associations with general intelligence are probably false positives. *Psychological Science*. 2011;In press.
8. Kivimaki M, Jokela M, Hamer M, Geddes J, Ebmeier K, Kumari M, et al. Examining Overweight and Obesity as Risk Factors for Common Mental Disorders Using Fat Mass and Obesity-Associated (FTO) Genotype-Instrumented Analysis. *Am J Epidemiol*. 2011 Feb 15;173(4):421-9.
9. Wilson AC. Investigations into gonadotropin-releasing hormone receptor signaling in extrahypothalamic neurons of the brain: Implications for normal cognition and the pathogenesis of Alzheimer's disease: Thesis. University of Wisconsin, Madison, USA; 2009.
10. Fishman D, Faulds G, Jeffery R, Mohamed-Ali V, Yudkin JS, Humphries S, et al. The effect of novel polymorphisms in the interleukin-6 (IL-6) gene on IL-6 transcription and plasma IL-6 levels, and an association with systemic-onset juvenile chronic arthritis. *The Journal of Clinical Investigation*. 1998;102(7):1369-76.
11. Slattery ML, Curtin K, Sweeney C, Wolff RK, Baumgartner RN, Baumgartner KB, et al. Modifying Effects of IL-6 Polymorphisms on Body Size-Associated Breast Cancer Risk. *Obesity*. 2008;16(2):339-47.
12. Huth C, Heid IM, Vollmert C, Gieger C, Grallert H, Wolford JK, et al. IL6 Gene Promoter Polymorphisms and Type 2 Diabetes. *Diabetes*. 2006 October 2006;55(10):2915-21.
13. Bull SJ, Huezio-Diaz P, Binder EB, Cubells JF, Ranjith G, Maddock C, et al. Functional polymorphisms in the interleukin-6 and serotonin transporter genes, and depression and fatigue induced by interferon-alpha and ribavirin treatment. *Mol Psychiatry*. 2009 Dec;14(12):1095-104.

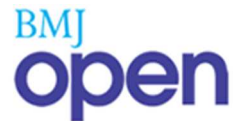

## Multi-Gene Interactions and the Prediction of Depression in the Wisconsin Longitudinal Study

|                                 |                                                                                                                                                                                                                                                                                                                                                                                |
|---------------------------------|--------------------------------------------------------------------------------------------------------------------------------------------------------------------------------------------------------------------------------------------------------------------------------------------------------------------------------------------------------------------------------|
| Journal:                        | <i>BMJ Open</i>                                                                                                                                                                                                                                                                                                                                                                |
| Manuscript ID:                  | bmjopen-2012-000944.R2                                                                                                                                                                                                                                                                                                                                                         |
| Article Type:                   | Research                                                                                                                                                                                                                                                                                                                                                                       |
| Date Submitted by the Author:   | 18-May-2012                                                                                                                                                                                                                                                                                                                                                                    |
| Complete List of Authors:       | Roetker, Nicholas; UW-Madison, Sociology<br>Yonker, James; UW-Madison, Sociology<br>Lee, Chee; UW-Madison, Sociology<br>Chang, Vicky; UW-Madison, Sociology<br>Basson, Jacob; UW-Madison, Medicine<br>Roan, Carol; UW-Madison, Sociology<br>Hauser, Taissa; UW-Madison, Sociology<br>Hauser, Robert; UW-Madison, Sociology<br>Atwood, Craig; University of Wisconsin, Medicine |
| <b>Primary Subject Heading</b>: | Mental health                                                                                                                                                                                                                                                                                                                                                                  |
| Secondary Subject Heading:      | Epidemiology, Mental health, Neurology, Genetics and genomics, Public health                                                                                                                                                                                                                                                                                                   |
| Keywords:                       | EPIDEMIOLOGY, MENTAL HEALTH, Neurogenetics < NEUROLOGY, Anxiety disorders < PSYCHIATRY, Depression & mood disorders < PSYCHIATRY                                                                                                                                                                                                                                               |
|                                 |                                                                                                                                                                                                                                                                                                                                                                                |

SCHOLARONE™  
Manuscripts

Only

STROBE Statement—Checklist of items that should be included in reports of *cohort studies*

|                              | Item No | Recommendation                                                                                                                                                                                                                                                                                                                                                                                                |
|------------------------------|---------|---------------------------------------------------------------------------------------------------------------------------------------------------------------------------------------------------------------------------------------------------------------------------------------------------------------------------------------------------------------------------------------------------------------|
| <b>Title and abstract</b>    | 1       | (a) Indicate the study's design with a commonly used term in the title or the abstract<br>(b) Provide in the abstract an informative and balanced summary of what was done and what was found                                                                                                                                                                                                                 |
| <b>Introduction</b>          |         |                                                                                                                                                                                                                                                                                                                                                                                                               |
| Background/rationale         | 2       | Explain the scientific background and rationale for the investigation being reported                                                                                                                                                                                                                                                                                                                          |
| Objectives                   | 3       | State specific objectives, including any prespecified hypotheses                                                                                                                                                                                                                                                                                                                                              |
| <b>Methods</b>               |         |                                                                                                                                                                                                                                                                                                                                                                                                               |
| Study design                 | 4       | Present key elements of study design early in the paper                                                                                                                                                                                                                                                                                                                                                       |
| Setting                      | 5       | Describe the setting, locations, and relevant dates, including periods of recruitment, exposure, follow-up, and data collection                                                                                                                                                                                                                                                                               |
| Participants                 | 6       | (a) Give the eligibility criteria, and the sources and methods of selection of participants. Describe methods of follow-up<br>(b) For matched studies, give matching criteria and number of exposed and unexposed                                                                                                                                                                                             |
| Variables                    | 7       | Clearly define all outcomes, exposures, predictors, potential confounders, and effect modifiers. Give diagnostic criteria, if applicable                                                                                                                                                                                                                                                                      |
| Data sources/<br>measurement | 8*      | For each variable of interest, give sources of data and details of methods of assessment (measurement). Describe comparability of assessment methods if there is more than one group                                                                                                                                                                                                                          |
| Bias                         | 9       | Describe any efforts to address potential sources of bias                                                                                                                                                                                                                                                                                                                                                     |
| Study size                   | 10      | Explain how the study size was arrived at                                                                                                                                                                                                                                                                                                                                                                     |
| Quantitative variables       | 11      | Explain how quantitative variables were handled in the analyses. If applicable, describe which groupings were chosen and why                                                                                                                                                                                                                                                                                  |
| Statistical methods          | 12      | (a) Describe all statistical methods, including those used to control for confounding<br>(b) Describe any methods used to examine subgroups and interactions<br>(c) Explain how missing data were addressed<br>(d) If applicable, explain how loss to follow-up was addressed<br>(e) Describe any sensitivity analyses                                                                                        |
| <b>Results</b>               |         |                                                                                                                                                                                                                                                                                                                                                                                                               |
| Participants                 | 13*     | (a) Report numbers of individuals at each stage of study—eg numbers potentially eligible, examined for eligibility, confirmed eligible, included in the study, completing follow-up, and analysed<br>(b) Give reasons for non-participation at each stage<br>(c) Consider use of a flow diagram                                                                                                               |
| Descriptive data             | 14*     | (a) Give characteristics of study participants (eg demographic, clinical, social) and information on exposures and potential confounders<br>(b) Indicate number of participants with missing data for each variable of interest<br>(c) Summarise follow-up time (eg, average and total amount)                                                                                                                |
| Outcome data                 | 15*     | Report numbers of outcome events or summary measures over time                                                                                                                                                                                                                                                                                                                                                |
| Main results                 | 16      | (a) Give unadjusted estimates and, if applicable, confounder-adjusted estimates and their precision (eg, 95% confidence interval). Make clear which confounders were adjusted for and why they were included<br>(b) Report category boundaries when continuous variables were categorized<br>(c) If relevant, consider translating estimates of relative risk into absolute risk for a meaningful time period |

|                          |    |                                                                                                                                                                            |
|--------------------------|----|----------------------------------------------------------------------------------------------------------------------------------------------------------------------------|
| Other analyses           | 17 | Report other analyses done—eg analyses of subgroups and interactions, and sensitivity analyses                                                                             |
| <b>Discussion</b>        |    |                                                                                                                                                                            |
| Key results              | 18 | Summarise key results with reference to study objectives                                                                                                                   |
| Limitations              | 19 | Discuss limitations of the study, taking into account sources of potential bias or imprecision. Discuss both direction and magnitude of any potential bias                 |
| Interpretation           | 20 | Give a cautious overall interpretation of results considering objectives, limitations, multiplicity of analyses, results from similar studies, and other relevant evidence |
| Generalisability         | 21 | Discuss the generalisability (external validity) of the study results                                                                                                      |
| <b>Other information</b> |    |                                                                                                                                                                            |
| Funding                  | 22 | Give the source of funding and the role of the funders for the present study and, if applicable, for the original study on which the present article is based              |

\*Give information separately for exposed and unexposed groups.

**Note:** An Explanation and Elaboration article discusses each checklist item and gives methodological background and published examples of transparent reporting. The STROBE checklist is best used in conjunction with this article (freely available on the Web sites of PLoS Medicine at <http://www.plosmedicine.org/>, Annals of Internal Medicine at <http://www.annals.org/>, and Epidemiology at <http://www.epidem.com/>). Information on the STROBE Initiative is available at <http://www.strobe-statement.org>.

# Multi-Gene Interactions and the Prediction of Depression in the Wisconsin Longitudinal Study

Nicholas S. Roetker<sup>1</sup>, James A. Yonker<sup>1</sup>, Chee Lee<sup>1</sup>, Vicky Chang<sup>1</sup>, Jacob Basson<sup>2</sup>, Carol L. Roan<sup>1</sup>,  
Taissa S. Hauser<sup>1</sup>, Robert M. Hauser<sup>1</sup> and Craig S. Atwood<sup>2,3</sup>.

<sup>1</sup>Department of Sociology, University of Wisconsin-Madison, Madison, WI 53706, USA.

<sup>2</sup>Geriatric Research, Education and Clinical Center, Veterans Administration Hospital and Department of  
Medicine, University of Wisconsin-Madison School of Medicine and Public Health, Madison, WI 53705,  
USA.

<sup>3</sup>School of Exercise, Biomedical and Health Sciences, Edith Cowan University, Joondalup, 6027 WA,  
Australia.

**Running title:** Gene interactions and depression

**Address Correspondence and Reprint Requests to:**

Craig S. Atwood, Ph.D.  
University of Wisconsin-Madison School of Medicine and Public Health  
Wm S. Middleton Memorial VA (GRECC 11G)  
2500 Overlook Terrace, Madison, WI 53705, USA  
Tel. 608 256-1901, Ext. 11664  
Fax. 608 280-7291  
Email: [csa@medicine.wisc.edu](mailto:csa@medicine.wisc.edu)

## ABSTRACT

**Objectives:** Single genetic loci offer little predictive power for the identification of depression. This study examined whether an analysis of gene-gene interactions of 78 single nucleotide polymorphisms in genes associated with depression and age-related diseases would identify significant interactions with increased predictive power for depression.

**Design:** A retrospective cohort study.

**Setting:** A survey of participants in the Wisconsin Longitudinal Study.

**Participants:** A total of 4,811 persons (2,464 females and 2,347 males) who provided saliva for genotyping; the group comes from a randomly selected sample of Wisconsin high school graduates from the class of 1957 as well as a randomly selected sibling, almost all of whom are non-Hispanic white.

**Primary outcome measure:** Depression as determined by the Composite International Diagnostic Interview short-form (CIDI-SF).

**Results:** Using a classification tree approach (recursive partitioning (RP)) we identified a number of candidate gene-gene interactions associated with depression. The primary SNP splits revealed by RP (*ANKK1* rs1800497 (also known as *DRD2* Taq1A) in men and *DRD2* rs224592 in women) were found to be significant as single factors by logistic regression (LR) after controlling for multiple testing ( $P=0.001$  for both). Without considering interaction effects, only 1 of the 5 subsequent RP splits reached nominal significance in logistic regression (*FTO* rs1421085 in women;  $P$ -value=0.008). However, after controlling for gene-gene interactions by running logistic regression on RP-specific subsets, every split became significant and grew larger in magnitude (OR [before]→[after]: Men: *GNRH1* novel SNP: [1.43 → 1.57]; Women: *APOC3* rs2854116: [1.28 → 1.55], *ACVR2B* rs3749386: [1.11 → 2.17], *FTO* rs1421085: [1.32 → 1.65], *IL6* rs1800795: [1.12 → 1.85]).

**Conclusions:** Our results suggest that examining gene-gene interactions improves the identification of genetic associations predictive of depression. Four of the SNPs identified in these interactions were located in two pathways well-known to impact depression: neurotransmitter (*ANKK1* and *DRD2*) and

1  
2  
3  
4  
5  
6  
7  
8  
9  
10  
11  
12  
13  
14  
15  
16  
17  
18  
19  
20  
21  
22  
23  
24  
25  
26  
27  
28  
29  
30  
31  
32  
33  
34  
35  
36  
37  
38  
39  
40  
41  
42  
43  
44  
45  
46  
47  
48  
49  
50  
51  
52  
53  
54  
55  
56  
57  
58  
59  
60

neuroendocrine (*GNRH1* and *ACVR2B*) signaling. This study demonstrates the utility of RP analysis as an efficient and powerful exploratory analysis technique for uncovering genetic and molecular pathway interactions associated with disease etiology.

For peer review only

## INTRODUCTION

Depression is a widespread mental disorder associated with a host of undesirable health, social, and economic outcomes. One in six Americans is diagnosed with depression in his or her lifetime (1). While many environmental factors—such as socioeconomic status, childhood abuse, and major life events—have important ties with depression, so too does gender and many genetic and epigenetic factors, making the disorder heterogeneous in nature (2). Another major risk factor for depression is age, with depression reaching its highest levels in adults over 80 years of age (3).

It has been demonstrated from twin studies that genetic factors typically account for 40–70% of the risk for developing major depressive disorder (MDD), and adoption studies have confirmed the role of genetic risk factors in the development of MDD (see (4) and references therein). Genetic studies, including recent genome-wide association studies (GWAS), have identified genetic alterations in over 50 genes known to be associated with depression (5). However, individually, the genetic alterations found within these genes (primarily single nucleotide polymorphisms (SNPs)) have little predictive value. There is a similar lack of predictive value from GWAS of other major age-related diseases (6).

Given this lack of predictive power among individual genetic alterations for depression together with the complex nature of aging-related diseases, it would seem prudent to examine epistatic effects on this age-related condition. In this respect, we have previously demonstrated that G x G interactions greatly modulate risk for complex age-related diseases (7, 8). Recent studies of depression also have identified epistatic effects. In particular, associations have been identified between *BDNF* Val66Met (brain-derived neurotrophic factor; rs6265) and *5-HTTLPR* (serotonin transporter linked promoter region) (9); *GSK3B* rs6782799 (glycogen synthase kinase 3 $\beta$ ), *BDNF* rs7124442 and *BDNF* Val66Met (10); *BDNF* Val66Met and SNPs in *NTRK2* (neurotrophic tyrosine kinase receptor 2; (11)), and *5-HTTLPR* short allele and a chromosome 4 gene (12). The machine learning tool recursive partitioning has recently been used by Wong (13) to assess complex gene-gene interactions in depression. Wong notes that recursive partitioning is useful in that it quickly explores high dimensional data for non-linear effects that are non-



1  
2  
3 biased and easily interpretable.

4  
5 The goals of this study were therefore to 1) explore G x G interactions that might better predict the  
6  
7 genetic factors involved in the etiology of depression, and 2) to further demonstrate the utility of machine  
8  
9 learning algorithms (recursive partitioning) to identify genetic interactions. Using genotypic data from the  
10  
11 Wisconsin Longitudinal Study (WLS) we identified associations between dopaminergic genes and  
12  
13 depression in men and women, as well as G x G interactions involving neuroendocrine signaling  
14  
15 pathways, with increased significance compared with single genetic associations.  
16  
17  
18  
19  
20  
21  
22  
23  
24  
25  
26  
27  
28  
29  
30  
31  
32  
33  
34  
35  
36  
37  
38  
39  
40  
41  
42  
43  
44  
45  
46  
47  
48  
49  
50  
51  
52  
53  
54  
55  
56  
57  
58  
59  
60

## METHODS

### Study Participants and Surveys

Data were collected from the WLS, a random sample originally comprised of 10,317 men and women who graduated from Wisconsin high schools in 1957. Later in 1977, the WLS began interviewing one randomly selected sibling of each graduate, when possible. The cohort reflects the ancestral makeup of the late-1950s Wisconsin population in that participants are almost entirely non-Hispanic white males and females. . In general, the sample is broadly representative of older white Americans with at least a high school education (14). Further characteristics of the WLS cohort may be found in detail elsewhere (15). Health and psychological well-being phenotypic data was taken from mail and phone surveys given in 2004-2005. Inclusion criteria for depression included any member of the WLS cohort who was depressed according to the Composite International Diagnostic Interview short-form (CIDI-SF). Individuals who answered YES to the question “Have you ever had a time in life lasting two weeks or more when nearly every day you felt sad, blue, depressed, or when you lost interest in most things like work, hobbies, or things you usually liked to do for fun?” and whose depression was not caused by alcohol, drugs, medications, or physical illness were asked further depression symptom questions. Symptom questions asked whether the two week period was accompanied with a) any weight loss, b) trouble sleeping, c) feeling tired, d) feeling bad upon waking, e) losing interest, f) trouble concentrating, or g) thoughts about death. Those answering YES to 3 or more of these symptom questions were classified as having depression (16). Those answering YES to 2 or fewer symptom questions and all those answering NO to the initial stem question were classified as controls.

### Genotyping

7,101 participants (4,569 graduates & 2,532 siblings) provided saliva samples in Oragene DNA sample collection kits from which DNA was extracted and genotyped for 78 SNPs that were selected based on their association with depression and age-related conditions and diseases (see Supplementary

1  
2 Information 1). Genotyping was performed by KBioscience (Hoddesdon, UK) with use of a homogeneous  
3  
4 Fluorescent Resonance Energy Transfer technology coupled to competitive allele specific PCR. All SNP  
5  
6 genotypes described in our results were in Hardy-Weinberg equilibrium and their frequencies matched  
7  
8 those reported in the literature for European samples.  
9

### 10 11 12 13 Statistical Analysis

14  
15 Analyses were limited to the 4,811 pooled graduates and siblings for whom we have depression and  
16  
17 genotype information (Note: individuals with more than 10% missing genotype data were not included).  
18  
19 The average age among this sample was just under 65 years in 2004. 80% were married, and the  
20  
21 average amount of post-high school educational attainment was 2 years. Median household income in  
22  
23 1993 was \$56,700.  
24  
25  
26  
27

28 *Recursive Partitioning (RP)*. RP is a data mining tool for revealing trends that relate a dependent  
29  
30 variable (depressed vs. non-depressed) to various predictor variables (SNPs). Zhang and Bonney have  
31  
32 shown how RP can be used in genetic association studies to identify disease genes (17). RP helps control  
33  
34 for heterogeneity in the population and confounding factors by allowing for the segregation of the sample  
35  
36 population according to any condition. Thus, RP is a useful way to handle complex datasets that might  
37  
38 confound regression analysis due to the complexity of the relationship between the independent and  
39  
40 dependent variables and due to missing information.  
41  
42  
43

44 RP classification trees (using R package rpart) were used to identify potential interactions among the  
45  
46 78 SNPs in relation to depression. The trees split the data along branches according to criteria determined  
47  
48 by the rpart package algorithm, which is originally based off the work of Breiman's classification and  
49  
50 regression trees (CART) algorithm (18). Basically, the CART algorithm first considers all depressed and  
51  
52 non-depressed subjects pooled together in a heterogeneous root node. Based on considering every  
53  
54 possible "yes-no" binary partition that can be made by each independent variable, the single split which  
55  
56  
57  
58  
59  
60

1  
2 maximizes homogeneity between the two resulting sub-nodes as compared to the root node is made.  
3  
4 Each sub-node can then be treated independently as a new root node for all subsequent splits, and the  
5  
6 pattern continues until every subject constitutes a terminal node, resulting in a very large and complex  
7  
8 tree. A 10-part cross validation procedure seeking to minimize misclassification and complexity  
9  
10 determines optimal pruning. See Therneau and Atkinson (19) for specific details of the rpart package.  
11  
12 Priors were set to 0.5, 0.5. The usesurrogate parameter was set to 0 so that subjects missing the primary  
13  
14 split variable do not progress further down the tree, and maxsurrogate was set to 0 to cut computation  
15  
16 time in half. The threshold complexity parameter (cp) was set to 0.01. Tree nodes were re-created in  
17  
18 Microsoft Visio to display percentage depressed and the default number of controls/cases as presented by  
19  
20 rpart.  
21  
22  
23  
24  
25

26 *Logistic Regression (LR).* Variables found in association with depression based on RP analysis were  
27  
28 considered in single factor LR models, separate by gender, using the specific dichotomous splitting of  
29  
30 genotypes as designated by RP trees. Regression models for all seven SNP splits were first run on the full  
31  
32 dataset to represent single main factor effects. Then each split was run on the respective subset of data  
33  
34 as represented by the preceding RP split criteria. Thus, we attempt to mirror RP splits within a more  
35  
36 formal LR framework in order to measure the significance of interactions presented by the trees. Multiple  
37  
38 testing of 78 SNPs in RP for both male and females followed by 14 LR models resulted in a modified FDR  
39  
40 significance level of 0.009.  
41  
42  
43  
44  
45  
46  
47  
48  
49  
50  
51  
52  
53  
54  
55  
56  
57  
58  
59  
60

## RESULTS

Of the 4,811 participants (2,464 females and 2,347 males) under examination in this study, we identified 713 participants (481 females and 232 males) with depression (14.8 %). Given that the independent variable gender (when included as a factor in the full dataset) was the primary split on RP trees; that women are over two times as likely to be diagnosed with depression than men; and since the female etiology of depression has been reported to be associated with unique social, psychological, and biological factors (20), all subsequent analyses were performed by gender.

### Recursive Partitioning Analysis

To examine multi-gene interactions for association with depression we screened our dataset using RP. The two-factor RP tree (*ANKK1/GNRH1*) was the optimized pruning for men (Fig. 1), while the five-factor tree (*DRD2/APOC3/ACVR2B/FTO/IL6*) was the optimized pruning for women (Fig. 2). For more detailed information on the 7 SNPs found by RP, see Supplementary Information 2.

The best overall split for men was *ANKK1* rs1800497 (historically known as the *DRD2* Taq1A allele), where the incidence of depression increased 2.2-fold in those with no C-alleles compared to those with one or two C-alleles. Considering interaction between *ANKK1* and *GNRH1* widened the disparity in incidence, where those with at least one C-allele in both *ANKK1* rs1800497 and the novel SNP in *GNRH1* had a 2.7-fold lower incidence than those without a C-allele in *ANKK1* rs1800497.

For women, the best overall split was *DRD2* rs2242592, where those with one or two C-alleles had 1.3-fold higher incidence of depression compared to those without any C-alleles. G x G interactions associated with the highest incidence of depression included: *DRD2* rs2242592 T/T + *APOC3* rs45537037 T/T + *ACVR2B* rs3749386 C/C or T/T, accounting for a 1.4-fold increase in depression compared to baseline incidence.

### Single Main-Factor Effects

1  
2  
3  
4  
5  
6  
7  
8  
9  
10  
11  
12  
13  
14  
15  
16  
17  
18  
19  
20  
21  
22  
23  
24  
25  
26  
27  
28  
29  
30  
31  
32  
33  
34  
35  
36  
37  
38  
39  
40  
41  
42  
43  
44  
45  
46  
47  
48  
49  
50  
51  
52  
53  
54  
55  
56  
57  
58  
59  
60

Specific SNP interactions identified by RP were next analyzed by LR (see Table 1, Full Data). The primary SNP splits in males and females were significant at the modified FDR level. Men with no C-alleles for *ANKK1* rs1800497 had 2.55 times higher odds [P=0.001 (1.44, 4.51)] of depression compared with men with at least 1 C-allele. Women with at least 1 C-allele for *DRD2* rs2242592 had 1.32 times higher odds [P=0.006 (1.08-1.62)] of depression compared with women with no C-alleles. One other split reached nominal significance; women homozygous (C/C or T/T) for *FTO* rs1421085 had 1.32 times higher odds [P=0.008 (1.08-1.62)] for depression than women with a heterozygous genotype. SNP splits of *GNRH1*, *APOC3*, *ACVR2B*, and *IL6* did not significantly associate with depression.

### Gene-Gene Interactions Enhance Predictability for Depression

Specific SNP interactions identified by RP were next analyzed by LR as RP-specific subsets (see Table 1, RP-Subsetted Data). All 5 of the secondary and tertiary RP splits were found to be significant at the modified FDR level when considered as subsets. Among only men with at least one C-allele in *ANKK1* rs1800497, those with no C-allele in the novel SNP of *GNRH1* had 1.57 times higher odds [P=0.002 (1.18-2.08)] for depression than men with 1 or 2 C-alleles. For the subset of women in the first right-hand split of Fig. 2, those homozygous for *FTO* rs1421085 had 1.65 times higher odds [P=0.0005 (1.24-2.18)] for depression than women with a heterozygous genotype. For the remaining subset of women in the second right-hand split of Fig. 2, those homozygous for *IL6* rs1800795 had 1.85 times higher odds [P=0.006 (1.19-2.89)] for depression than women with a heterozygous genotype. For the subset of women in the first left-hand split of Fig. 2, those with no C-alleles for *APOC3* rs45537037 had 1.55 times higher odds [P=0.004 (1.15-2.09)] for depression than women with 1 or 2 C-alleles. For the subset of women in the second left-hand split of Fig. 2, those homozygous for *ACVR2B* rs3749386 had 2.17 times higher odds [P=0.001 (1.37-3.44)] for depression than women with a heterozygous genotype.

## DISCUSSION

Utilizing RP as a screening tool to find potential multi-gene interactions, followed by verification of multi-gene interactions with LR, our data demonstrate that multi-gene interactions predict depression with a greater certainty than single main factor associations. RP provided us with primary dichotomous genotype splits in men and women (*ANKK1* rs1800497 and *DRD2* rs2242592, respectively) that were both significant in LR models at the modified FDR level (Table 1). Considering the 5 subsequent RP splits in LR over the entire dataset, only 1 reached a nominal level of significance (barely), which was *FTO* rs1421085 in women. However, after running LR on specific subsets of data according to the pattern of RP branches, every split was found to be significant and every odds ratios grew larger (Table 1; OR [before]→[after]: Male Left: 1.43 → 1.57, Female Left 1: 1.28 → 1.55, Female Left 2: 1.11 → 2.17, Female Right 1: 1.32 → 1.65, Female Right 2: 1.12 → 1.85). Thus, RP provides two unique and important criteria: dichotomous genotype splitting instructions and gene-gene interaction patterns. These criteria go beyond the traditional single factor SNP approach to genetic association studies and allow identification of important multi-gene pathways that more suitably characterize the etiology of complex diseases.

### The Utility of Recursive Partitioning and Logistic Regression for Identification of Gene-Gene Interactions

With recent advances in genotyping allowing for high-dimensional SNP identification, it is now possible to examine genetic datasets not only for single main factor effects, but also G x G interactions. The requirement for G x G analyses as a better predictor of age-related diseases is obvious from the standpoint that humans are complex biological systems composed of numerous molecular interactions, and from recent studies indicating disease risk is modulated by G x G interactions (7). Notwithstanding this, the development of analytical tools for the identification of G x G interactions has not kept pace with the technological advances in identifying genetic alterations among individuals. In this respect, we have previously used MDR, LR and LD to identify G x G interactions among a small set of SNPs (7). However, large datasets require a screening tool to identify potential multi-gene interactions. In this study, we have

1  
2  
3 used RP to screen for multi-gene interactions, a data-mining technique that is currently under-utilized in  
4 genetic studies. RP serves as an efficient and powerful exploratory analysis technique, especially when  
5 looking for interactions in data sets with a large number of independent variables. This screening allows  
6 for the identification of G x G interactions (with greater explanatory power), that might otherwise not have  
7 been identified, and that can then be confirmed using more traditional statistical techniques. As illustrated  
8 in this paper, this data-mining methodology has the advantage of identification of genetic interactions  
9 *between* pathways involved in the etiology of depression, in keeping with the etiological heterogeneity of  
10 this disorder (see later).  
11  
12  
13  
14  
15  
16  
17  
18  
19

20  
21 Our study provides proof of principle for the use of RP in higher-dimensional analyses such as GWAS,  
22 where a comprehensive list of SNPs may fully explore genetic predisposition to depression and other age-  
23 related disease. The WLS is an ideal candidate for future GWAS studies given its large sample size, rich  
24 covariate composition and longitudinal nature.  
25  
26  
27  
28

29  
30 In this genetic study we aimed to identify underlying genetic predispositions to depression and thus  
31 have not yet tested environmental/phenotypic data. Future analyses using RP to examine the impact of  
32 phenotypic and environmental factors on the development of depression would be anticipated to identify  
33 gene-phenotype/environment and multi-phenotype/environment interactions. Indeed, the predictive gains  
34 of G x G analyses were stronger for men than women, despite the fact that depression occurs  
35 disproportionately in women (~2:1 female-to-male; (21-25)). This suggests that environmental factors may  
36 be needed in addition to genetic factors in understanding the etiological pathways for women. Indeed,  
37 biological factors such as hormonal changes related to reproductive status (26, 27) may impact  
38 environmental factors such as psychosocial experiences (trauma, stress, interpersonal relationships, etc)  
39 and general health issues in the development of depression.  
40  
41  
42  
43  
44  
45  
46  
47  
48  
49  
50  
51  
52

### 53 Genetic and Biological Correlates of Depression

54

55 Numerous studies have identified SNPs that associate with depression. Many of the SNPs associated  
56  
57  
58  
59  
60



1  
2  
3 with depression from other studies were not significantly associated in our study. This is perhaps not  
4  
5 surprising, since a single factor is unlikely to provide consistent association especially in a complex  
6  
7 condition such as depression, where multiple pathways intersect in regulating the risk of the disease. For  
8  
9 example, if a SNP within the serotonin pathway also requires a SNP in the glutamatergic pathway in order  
10  
11 for the patient to present with depression, the presence of either SNP in the absence of the other will not  
12  
13 be predictive of depression. Moreover, as indicated by Shi and Weinberg, since the human genome  
14  
15 contains genetic redundancy, disruption of a single gene may be selectively neutral, but the malfunction of  
16  
17 several genes in a pathway might result in expression of a particular phenotype (28).  
18  
19

20  
21 Both the primary splits in men and women were SNPs linked with *DRD2* (dopamine receptor D2), a  
22  
23 gene that has previously been linked with depression and social phobia (29-31). The primary male  
24  
25 genotype split rs1800497, technically found in gene *ANKK1*, is historically known as the *DRD2* Taq1A  
26  
27 allele because of its known association with decreased dopamine receptor D2 density (in those with T  
28  
29 alleles) (32-35). The Taq1A allele has also been previously associated with depressive symptoms in  
30  
31 children, where those with the A1 allele (T) were more likely to have depressive symptoms (36). We saw a  
32  
33 similar association between A1 and depression in WLS men, where those with two A1 alleles had 2.6  
34  
35 times higher odds for depression compared to those with one or no A1 alleles. The primary split in women  
36  
37 (*DRD2* rs2242592) has previously been found to be associated with schizophrenia, where the C-allele  
38  
39 was associated with higher susceptibility for schizophrenia (37). Interestingly, this same study also found  
40  
41 the Taq1A allele to also associate with schizophrenia.  
42  
43

44  
45 The secondary and tertiary right-hand splits in the female RP tree—*FTO* (fat mass and obesity  
46  
47 associated) rs1421085 and *IL6* (interleukin 6) rs1800795—have also been found to relate with mental  
48  
49 illness and depression in previous studies (38, 39). There is evidence that activin receptor signaling also  
50  
51 is involved in affective disorders, especially when considering interaction with GABAergic pathways (40).  
52  
53 Although we did not see an interaction between SNPs in GABA/activin receptor genes and depression,  
54  
55 *ACVR2B* was associated with depression in women. No previous associations between depression and  
56  
57  
58  
59  
60

1  
2  
3 *APOC3*, *ACVR2B*, or *GNRH1* have been reported.

4  
5 That these genetic variants are associated with *neuroendocrine* pathways (*GnRH1*, *ACVR2B*) that are  
6 known to regulate *neurotransmitter* release and cognitive behavior (39-40) supports these associations as  
7 relevant to the etiology of depression and underlines the benefits of using RP to identify meaningful G x G  
8 interactions associated with disease.  
9  
10  
11  
12

### 13 14 15 16 Limitations

17  
18 Given the numerous genetic, phenotypic and environmental influences that are linked to depression,  
19 and the small number of SNPs analyzed, it is not surprising that predictability from our models was low  
20 (although our predictability was superior to previous studies examining only single main factors). Also, the  
21 predictive value of our statistical models was further limited due to user bias in selection of SNPs (from  
22 nearly two-million SNPs in the human genome) used in this study. As a result of this, interactions we have  
23 found could potentially be moderated by another gene that we have not considered in this study.  
24  
25 Nonetheless, we identified significant G x G interactions between known, and newly identified, loci  
26 associated with depression. Importantly, 4 of the 7 SNPs identified in these interactions were primarily  
27 located in two pathways well-known to impact depression: neurotransmitter and neuroendocrine signaling.  
28  
29  
30  
31  
32  
33  
34  
35  
36  
37

38 The results from the RP analyses conducted in this study were confirmed by LR, demonstrating the  
39 utility of RP as a screening tool for identifying meaningful G x G interactions. Future development of  
40 algorithms for RP analysis should not only maximize the distance between branches of the next best split  
41 (i.e. *rpart*), but consider subsequent future split combinations that could potentially result in trees with  
42  
43  
44  
45  
46  
47 “better” overall predictability.  
48  
49  
50

### 51 Summary

52  
53 Our data indicate that G x G interaction analyses allows for enhanced predictability of conditions and  
54 diseases of aging. RP is an efficient and powerful exploratory analysis technique for elucidating G x G  
55  
56  
57  
58  
59  
60

1  
2  
3 interactions in large datasets and combined with LR provides an important statistical analysis for the  
4 identification of well supported G x G interactions. We predict that such analytical methods will play an  
5 increasingly important role in the identification of epistatic effects in future large GWAS. Finally, our  
6 studies illustrate how RP analyses can be used to find interacting pathways involved in the etiology of a  
7 disease or condition such as depression.  
8  
9  
10  
11  
12  
13  
14  
15  
16  
17  
18  
19  
20  
21  
22  
23  
24  
25  
26  
27  
28  
29  
30  
31  
32  
33  
34  
35  
36  
37  
38  
39  
40  
41  
42  
43  
44  
45  
46  
47  
48  
49  
50  
51  
52  
53  
54  
55  
56  
57  
58  
59  
60

For peer review only

## ACKNOWLEDGMENTS

This research uses data from the Wisconsin Longitudinal Study (WLS) of the University of Wisconsin-Madison. Since 1991, the WLS has been supported principally by the National Institute on Aging (AG-9775, AG-21079 and AG-033285), with additional support from the Vilas Estate Trust, the National Science Foundation, the Spencer Foundation, and the Graduate School of the University of Wisconsin-Madison. A public use file of data from the Wisconsin Longitudinal Study is available from the Wisconsin Longitudinal Study, University of Wisconsin-Madison, 1180 Observatory Drive, Madison, Wisconsin 53706 and at <http://www.ssc.wisc.edu/wlsresearch/data/>. This material is the result of work supported with resources at the William S. Middleton Memorial Veterans Hospital, Madison, WI. The opinions expressed herein are those of the authors. The contents do not represent the views of the Dept. of Veterans Affairs or the United States Government.

## FIGURE LEGENDS

**Figure 1.** Recursive Partitioning Tree of CIDI-SF Depression in Males of the WLS. Upper and lower numbers in nodes represent the percentage of participants with depression and the number of controls/cases in that node, respectively. Blue and purple boxes/circles indicate lower and higher rates of depression relative to the primary node, respectively. Split information indicates gene, SNP, and genotype criteria, respectively. M1 is subset of data referenced in Table 1. Sensitivity: 0.526, Specificity: 0.598, Accuracy: 0.591. Due to missing genotype information, we lose approximately 1.5% of participants per split. \*rs1800497 is historically known as the *DRD2* Taq1A allele

**Figure 2.** Recursive Partitioning Tree of CIDI-SF Depression in Females of the WLS. Upper and lower numbers in nodes represent the percentage of participants with depression and the number of controls/cases in that node, respectively. Blue and purple boxes/circles indicate lower and higher rates of depression relative to the primary node, respectively. Split information indicates gene, SNP, and genotype criteria, respectively. F1-F4 are subsets referenced in Table 1. Sensitivity: 0.607, Specificity: 0.563, Accuracy: 0.572. Due to missing genotype information, we lose approximately 1.4% of participants per split.

1  
2  
3  
4  
5  
6  
7  
8  
9  
10  
11  
12  
13  
14  
15  
16  
17  
18  
19  
20  
21  
22  
23  
24  
25  
26  
27  
28  
29  
30  
31  
32  
33  
34  
35  
36  
37  
38  
39  
40  
41  
42  
43  
44  
45  
46  
47  
48  
49  
50  
51  
52  
53  
54  
55  
56  
57  
58  
59  
60

For peer review only

1  
2  
3  
4  
5  
6  
7  
8  
9  
10  
11  
12  
13  
14  
15  
16  
17  
18  
19  
20  
21  
22  
23  
24  
25  
26  
27  
28  
29  
30  
31  
32  
33  
34  
35  
36  
37  
38  
39  
40  
41  
42  
43  
44  
45  
46  
47  
48  
49

**Table 1.**

Single-factor logistic regression models based directly off male and female RP tree split criteria (see Figures 1 & 2). Each SNP split was first run on the full dataset to represent single main factor effects (“Full Data”) for both males and females. Then the same SNP splits were run on specific subsets of data per RP tree splits (M1, F1-F4; “RP-Subsetted Data”).

| Gender | RP Split | Gene          | SNP       | Genotypes         | Full Data        |         | RP-Subsetted Data |                  |          |
|--------|----------|---------------|-----------|-------------------|------------------|---------|-------------------|------------------|----------|
|        |          |               |           |                   | OR (95% CI)      | P-value | Subset            | OR (95% CI)      | P-value  |
| Male   | Primary  | <i>ANKK1*</i> | rs1800497 | T/T vs. C/C + C/T | 2.55 (1.44-4.51) | 0.001 * | --                | ----             | ----     |
|        | Left     | <i>GNRH1</i>  | novel SNP | T/T vs. C/C + T/C | 1.43 (1.09-1.88) | 0.011   | M1                | 1.57 (1.18-2.08) | 0.002 *  |
| Female | Primary  | <i>DRD2</i>   | rs2242592 | C/C + T/C vs. T/T | 1.32 (1.08-1.62) | 0.006 * | --                | ----             | ----     |
|        | Left 1   | <i>APOC3</i>  | rs2854116 | T/T vs. C/C + T/C | 1.28 (1.04-1.57) | 0.018   | F1                | 1.55 (1.15-2.09) | 0.004 *  |
|        | Left 2   | <i>ACVR2B</i> | rs3749386 | C/C + T/T vs. T/C | 1.11 (0.91-1.36) | 0.302   | F2                | 2.17 (1.37-3.44) | 0.001 *  |
|        | Right 1  | <i>FTO</i>    | rs1421085 | C/C + T/T vs. T/C | 1.32 (1.08-1.62) | 0.007 * | F3                | 1.65 (1.24-2.18) | 0.0005 * |
|        | Right 2  | <i>IL6</i>    | rs1800795 | C/C + G/G vs. C/G | 1.12 (0.92-1.37) | 0.269   | F4                | 1.85 (1.19-2.89) | 0.006 *  |

RP, recursive partitioning; OR, odds ratio; CI, confidence interval  
M1: LR analysis was run for only those with genotype *DRD2* rs1800497 C/C or C/T  
F1: LR analysis was run for only those with genotype *DRD2* rs2242592 T/T  
F2: LR analysis was run for only those with genotypes *DRD2* rs2242592 T/T and *APOC3* rs2854116 T/T  
F3: LR analysis was run for only those with genotype *DRD2* rs2242592 C/C or T/C  
F4: LR analysis was run for only those with genotypes *DRD2* rs2242592 C/C or T/C and *FTO* rs1421085 T/C  
\*rs1800497 is historically known as the *DRD2* Taq1A allele

1  
2  
3  
4  
5  
6  
7  
8  
9  
10  
11  
12  
13  
14  
15  
16  
17  
18  
19  
20  
21  
22  
23  
24  
25  
26  
27  
28  
29  
30  
31  
32  
33  
34  
35  
36  
37  
38  
39  
40  
41  
42  
43  
44  
45  
46  
47  
48  
49

For peer review only



**REFERENCES**

1. CDC. Anxiety and Depression. Atlanta, GA: Centers for Disease Control and Prevention; 2009 [cited 2010 Oct. 18]; Available from: <http://www.cdc.gov/Features/dsBRFSSDepressionAnxiety/>.
2. Eley TC, Sugden K, Corsico A, et al. Gene-environment interaction analysis of serotonin system markers with adolescent depression. *Mol Psychiatry*. 2004;9(10):908-15.
3. Mirowsky J, Ross CE. Age and Depression. *Journal of Health and Social Behavior*. 1992;33(3):187-205.
4. Zubenko GS, Zubenko WN, Spiker DG, et al. Malignancy of recurrent, early-onset major depression: a family study. *Am J Med Genet*. 2001 Dec 8;105(8):690-9.
5. Raymer KA, Waters RF, Price CR. Proposed multigenic Composite Inheritance in major depression. *Medical Hypotheses*. 2005;65(1):158-72.
6. Harold D, Abraham R, Hollingworth P, et al. Genome-wide association study identifies variants at CLU and PICALM associated with Alzheimer's disease. *Nat Genet*. 2009 Oct;41(10):1088-93.
7. Haasl R, Ahmadi MR, Meethal S, et al. A luteinizing hormone receptor intronic variant is significantly associated with decreased risk of Alzheimer's disease in males carrying an apolipoprotein E epsilon4 allele. *BMC Medical Genetics*. 2008;9(1):37.
8. Basson J, Wilson A, Haasl R, et al. Multi locus interactions in steroidogenic pathway genes predict Alzheimer's disease. *Alzheimer's and Dementia*. 2008;4(4 (Suppl. 2)):T579: P3-199.
9. Pezawas L, Meyer-Lindenberg A, Goldman AL, et al. Evidence of biologic epistasis between BDNF and SLC6A4 and implications for depression. *Mol Psychiatry*. 2008;13(7):709-16.
10. Zhang K, Yang C, Xu Y, et al. Genetic association of the interaction between the BDNF and GSK3B genes and major depressive disorder in a Chinese population. *Journal of Neural Transmission*. 2010;117(3):393-401.

- 1  
2  
3 11. Lin E, Hong CJ, Hwang JP, et al. Gene-gene interactions of the brain-derived neurotrophic-factor  
4 and neurotrophic tyrosine kinase receptor 2 genes in geriatric depression. Rejuvenation Res.  
5  
6 2009;12(6):387-93.  
7
- 8  
9  
10 12. Neff CD, Abkevich V, Potter J, et. al. Evidence for epistasis between SLC6A4 and a chromosome 4  
11 gene as risk factors in major depression. American Journal of Medical Genetics Part B: Neuropsychiatric  
12 Genetics. 2010;153B(1):321-2.  
13
- 14  
15  
16 13. Wong ML, Dong C, Andreev V, et. al. Prediction of susceptibility to major depression by a model  
17 of interactions of multiple functional genetic variants and environmental factors. Mol Psychiatry. 2012  
18 Mar 27.  
19
- 20  
21  
22 14. Carr D, Khodyakov D. End-of-life health care planning among young-old adults: An assessment of  
23 psychosocial influences. J Gerontol B-Psychol. 2007 Mar;62(2):S135-S41.  
24
- 25  
26  
27 15. Sewell WH. As We Age : The Wisconsin Longitudinal Study, 1957-2001: Center for Demography  
28 and Ecology University of Wisconsin--Madison; 2001.  
29
- 30  
31  
32 16. Nelson CB, Kessler RC, Mroczek D. Scoring the World Health Organization's Composite  
33 International Diagnostic Interview Short Form (CIDI-SF; v1.0 NOV98). 1998.  
34
- 35  
36  
37 17. Zhang H, Bonney G. Use of classification trees for association studies. Genet Epidemiol. 2000  
38 Dec;19(4):323-32.  
39
- 40  
41  
42 18. Breiman L, Friedman J, Olshen R, et. al. Classification and Regression Trees. Boca Raton:  
43 Chapman and Hall/CRC; 1984.  
44
- 45  
46  
47 19. Therneau T, Atkinson E, editors. Technical Report Series No. 61, An Introduction to Recursive  
48 Partitioning Using the RPART Routines. Rochester, MN: Department of Health Science Research, Mayo  
49 Clinic; 1997.  
50
- 51  
52  
53 20. Accortt EE, Freeman MP, Allen JJB. Women and Major Depressive Disorder: Clinical Perspectives  
54 on Causal Pathways. Journal of Women's Health. 2008;17(10):1583-90.  
55  
56  
57  
58  
59  
60

- 1  
2  
3 21. Kessler RC, McGonagle KA, Swartz M, et. al. Sex and depression in the National Comorbidity  
4 Survey. I: Lifetime prevalence, chronicity and recurrence. *J Affect Disord.* 1993 Oct-Nov;29(2-3):85-96.  
5  
6
- 7 22. Kessler RC, McGonagle KA, Nelson CB, et. al. Sex and depression in the National Comorbidity  
8 Survey. II: Cohort effects. *J Affect Disord.* 1994 Jan;30(1):15-26.  
9
- 10 23. Kessler RC, McGonagle KA, Zhao S, et al. Lifetime and 12-month prevalence of DSM-III-R  
11 psychiatric disorders in the United States. Results from the National Comorbidity Survey. *Arch Gen*  
12 *Psychiatry.* 1994 Jan;51(1):8-19.  
13  
14
- 15 24. Weissman MM, Bland R, Joyce PR, et. al. Sex differences in rates of depression: cross-national  
16 perspectives. *J Affect Disord.* 1993 Oct-Nov;29(2-3):77-84.  
17  
18
- 19 25. Weissman MM, Olfson M. Depression in women: implications for health care research. *Science.*  
20 1995 Aug 11;269(5225):799-801.  
21  
22
- 23 26. Pajer K. New strategies in the treatment of depression in women. *The Journal of clinical*  
24 *psychiatry.* [Review]. 1995;56 Suppl 2:30-7.  
25  
26
- 27 27. Paykel ES. Depression in women. *Br J Psychiatry Suppl.* [Review]. 1991 May(10):22-9.  
28  
29
- 30 28. Shi M, Weinberg CR. How Much Are We Missing in SNP-by-SNP Analyses of Genome-wide  
31 Association Studies? *Epidemiology.* 2011 Nov;22(6):845-7.  
32  
33
- 34 29. Lawford BR, Young R, Noble EP, et. al. The D2 dopamine receptor (DRD2) gene is associated with  
35 co-morbid depression, anxiety and social dysfunction in untreated veterans with post-traumatic stress  
36 disorder. *European Psychiatry.* 2006;21(3):180-5.  
37  
38
- 39 30. Klimek V, Schenck JE, Han H, et. al. Dopaminergic abnormalities in amygdaloid nuclei in major  
40 depression: a postmortem study. *Biol Psychiatry.* 2002 Oct 1;52(7):740-8.  
41  
42
- 43 31. Schneier FR, Liebowitz MR, Abi-Dargham A, et. al. Low dopamine D(2) receptor binding potential  
44 in social phobia. *Am J Psychiatry.* 2000 Mar;157(3):457-9.  
45  
46  
47  
48  
49  
50  
51  
52  
53  
54  
55  
56  
57  
58  
59  
60

- 1  
2  
3 32. Noble EP, Blum K, Ritchie T et. al. Allelic Association of the D2 Dopamine Receptor Gene With  
4 Receptor-Binding Characteristics in Alcoholism or Gene ism. Arch Gen Psychiatry. 1991 July 1,  
5  
6 1991;48(7):648-54.  
7  
8  
9  
10 33. Thompson J, Thomas N, Singleton A, et al. D2 dopamine receptor gene (DRD2) Taq1 A  
11  
12 polymorphism: reduced dopamine D2 receptor binding in the human striatum associated with the A1  
13  
14 allele. Pharmacogenetics. 1997 Dec;7(6):479-84.  
15  
16  
17 34. Pohjalainen T, Rinne JO, Nagren K, et al. The A1 allele of the human D2 dopamine receptor gene  
18  
19 predicts low D2 receptor availability in healthy volunteers. Mol Psychiatry. 1998 May;3(3):256-60.  
20  
21 35. Jonsson EG, Nothen MM, Grunhage F, et al. Polymorphisms in the dopamine D2 receptor gene  
22  
23 and their relationships to striatal dopamine receptor density of healthy volunteers. Mol Psychiatry. 1999  
24  
25 May;4(3):290-6.  
26  
27  
28 36. Hayden EP, Klein DN, Dougherty LR, et al. The dopamine D2 receptor gene and depressive and  
29  
30 anxious symptoms in childhood: associations and evidence for gene-environment correlation and gene-  
31  
32 environment interaction. Psychiatr Genet. 2010 Dec;20(6):304-10.  
33  
34  
35 37. Dubertret C, Bardel C, Ramoz N, et al. A genetic schizophrenia-susceptibility region located  
36  
37 between the ANKK1 and DRD2 genes. Progress in Neuro-Psychopharmacology and Biological Psychiatry.  
38  
39 2010;34(3):492-9.  
40  
41  
42 38. Kivimaki M, Jokela M, Hamer M, et al. Examining Overweight and Obesity as Risk Factors for  
43  
44 Common Mental Disorders Using Fat Mass and Obesity-Associated (FTO) Genotype-Instrumented  
45  
46 Analysis. Am J Epidemiol. 2011 Feb 15;173(4):421-9.  
47  
48  
49 39. Bull SJ, Huezo-Diaz P, Binder EB, et al. Functional polymorphisms in the interleukin-6 and  
50  
51 serotonin transporter genes, and depression and fatigue induced by interferon-alpha and ribavirin  
52  
53 treatment. Mol Psychiatry. 2009 Dec;14(12):1095-104.  
54  
55  
56  
57  
58  
59  
60

1  
2  
3  
4  
5  
6  
7  
8  
9  
10  
11  
12  
13  
14  
15  
16  
17  
18  
19  
20  
21  
22  
23  
24  
25  
26  
27  
28  
29  
30  
31  
32  
33  
34  
35  
36  
37  
38  
39  
40  
41  
42  
43  
44  
45  
46  
47  
48  
49  
50  
51  
52  
53  
54  
55  
56  
57  
58  
59  
60

40. Zheng F, Adelsberger H, Muller MR, et. al. Alzheimer C. Activin tunes GABAergic neurotransmission and modulates anxiety-like behavior. Mol Psychiatry. 2008;14(3):332-46.

For peer review only

1  
2  
3  
4  
5  
6  
7  
8  
9  
10  
11  
12  
13  
14  
15  
16  
17  
18  
19  
20  
21  
22  
23  
24  
25  
26  
27  
28  
29  
30  
31  
32  
33  
34  
35  
36  
37  
38  
39  
40  
41  
42  
43  
44  
45  
46  
47  
48  
49  
50  
51  
52  
53  
54  
55  
56  
57  
58  
59  
60



74x74mm (300 x 300 DPI)



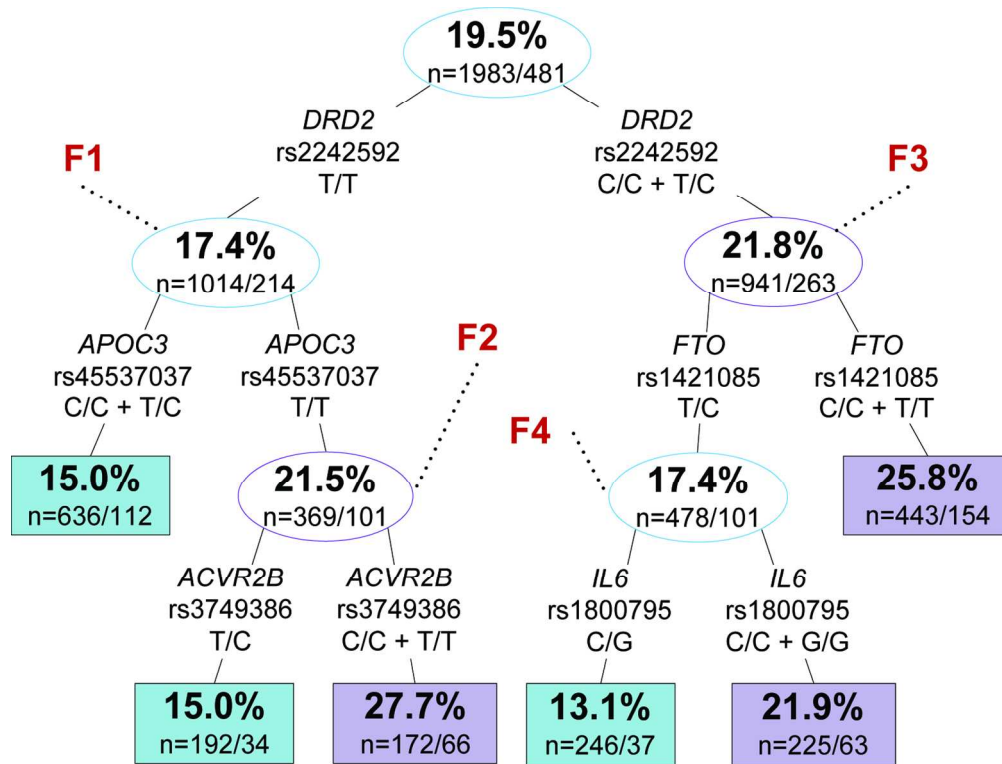

134x102mm (300 x 300 DPI)

Review only

1  
2  
3  
4  
5  
6  
7  
8  
9  
10  
11  
12  
13  
14  
15  
16  
17  
18  
19  
20  
21  
22  
23  
24  
25  
26  
27  
28  
29  
30  
31  
32  
33  
34  
35  
36  
37  
38  
39  
40  
41  
42  
43  
44  
45  
46  
47  
48  
49  
50  
51  
52  
53  
54  
55  
56  
57  
58  
59  
60

**Supplementary Table 1.** Single Nucleotide Polymorphisms Assessed in the WLS

| Gene              | Encodes                                                             | SNP        | Associated disease/behavior                                                                                                         |
|-------------------|---------------------------------------------------------------------|------------|-------------------------------------------------------------------------------------------------------------------------------------|
| <i>A2M</i>        | alpha-2-macroglobulin                                               | rs669      | Alzheimer's disease (1)                                                                                                             |
| <i>ACVR2A</i>     | activin receptor IIA                                                | rs1424954  | pre-eclampsia (2)                                                                                                                   |
| <i>ACVR2B</i>     | activin receptor IIB                                                | rs3749386  | --                                                                                                                                  |
| <i>ADIPOQ</i>     | adiponectin, C1Q and collagen domain containing                     | rs1501299  | diabetes II (3, 4), obesity (5, 6), breast cancer (7)                                                                               |
| <i>ADIPOQ</i>     | adiponectin, C1Q and collagen domain containing                     | rs2241766  | diabetes II (3, 4), obesity (8), breast cancer (7)                                                                                  |
| <i>ACVRL1</i>     | activin receptor-like kinase 1                                      | rs2071219  | brain arteriovenous malformations (9)                                                                                               |
| <i>APOC-3</i>     | apolipoprotein C-III                                                | rs2854116  | nonalcoholic fatty liver disease (10)                                                                                               |
| <i>ApoE</i>       | apolipoprotein E                                                    | rs429358   | Alzheimer's disease (11, 12)                                                                                                        |
| <i>ApoE</i>       | apolipoprotein E                                                    | rs7412     | Alzheimer's disease (11, 12)                                                                                                        |
| <i>AR</i>         | androgen receptor                                                   | rs6152     | male pattern baldness (13)                                                                                                          |
| <i>BCKDHB</i>     | branched chain keto acid dehydrogenase E1, beta polypeptide         | rs4502885  | premature ovarian failure (14)                                                                                                      |
| <i>BDNF</i>       | brain-derived neurotrophic factor                                   | rs6265     | depression (15-17), alcohol dependence-related depression (18), bipolar disorder (19), schizophrenia (20), cognition (21), BMI (22) |
| <i>BDNF</i>       | brain-derived neurotrophic factor                                   | rs908867   | antidepressant response (23)                                                                                                        |
| <i>BRCA1</i>      | breast cancer 1, early onset                                        | rs1799966  | breast cancer (24)                                                                                                                  |
| <i>BRCA2</i>      | breast cancer 2, early onset homolog                                | rs144848   | breast cancer (24)                                                                                                                  |
| <i>CH25H</i>      | cholesterol 25-hydroxylase                                          | rs3802657  | --                                                                                                                                  |
| <i>CHRM2</i>      | cholinergic receptor, muscarinic 2                                  | rs2061174  | alcohol dependence, depression (25)                                                                                                 |
| <i>CHRM2</i>      | cholinergic receptor, muscarinic 2                                  | rs8191992  | cognition (26)                                                                                                                      |
| <i>COMT</i>       | catechol-O-methyltransferase                                        | rs4680     | ADHD (27), substance abuse (28-31), depression (32), antidepressant response (33), bipolar disorder (34), cognition (35)            |
| <i>CTSD</i>       | cathepsin D                                                         | rs17571    | Alzheimer's disease (36)                                                                                                            |
| <i>CYP11A1</i>    | cytochrome P450, family 11, subfamily A, polypeptide 1              | rs8039957  | breast cancer (37)                                                                                                                  |
| <i>CYP11B2</i>    | cytochrome P450, family 11, subfamily B, polypeptide 2              | rs1799998  | stroke (38), cardiovascular disease (39)                                                                                            |
| <i>DAT1</i>       | human dopamine transporter                                          | rs11564774 | ADHD (40)                                                                                                                           |
| <i>DAT1</i>       | human dopamine transporter                                          | rs2963238  | alcohol-withdrawal seizures (41)                                                                                                    |
| <i>DISC1</i>      | disrupted in schizophrenia 1                                        | rs821616   | schizophrenia (42), cognitive aging (43)                                                                                            |
| <i>DRD2</i>       | dopamine receptor D2                                                | rs17529477 | --                                                                                                                                  |
| <i>DRD2/ANKK1</i> | dopamine receptor D2/ ankyrin repeat and kinase domain containing 1 | rs1800497  | obesity, drug addiction (44)                                                                                                        |
| <i>DRD2</i>       | dopamine receptor D2                                                | rs2242592  | schizophrenia (45)                                                                                                                  |
| <i>DRD2</i>       | dopamine receptor D2                                                | rs4245147  | --                                                                                                                                  |
| <i>DRD2</i>       | dopamine receptor D2                                                | rs6277     | schizophrenia (46), PTSD (47)                                                                                                       |
| <i>DRD4</i>       | dopamine receptor D4                                                | rs1800955  | ADHD (48), heroine addiction (49)                                                                                                   |
| <i>DTNBP1</i>     | dystrobrevin-binding protein 1                                      | rs1018381  | schizophrenia (50), cognitive ability (51)                                                                                          |
| <i>DTNBP1</i>     | dystrobrevin-binding protein 1                                      | rs760761   | schizophrenia (52)                                                                                                                  |
| <i>ESR1</i>       | estrogen receptor 1                                                 | rs7761133  | --                                                                                                                                  |
| <i>ESR1</i>       | estrogen receptor 1                                                 | rs3853248  | --                                                                                                                                  |
| <i>FADS2</i>      | fatty acid desaturase 2                                             | rs1535     | breastfeeding & IQ (53)                                                                                                             |



|    |                |                                             |            |                                                                             |
|----|----------------|---------------------------------------------|------------|-----------------------------------------------------------------------------|
| 1  |                |                                             |            |                                                                             |
| 2  |                |                                             |            |                                                                             |
| 3  | <i>FADS2</i>   | fatty acid desaturase 2                     | rs174575   | breastfeeding & IQ (53)                                                     |
| 4  | <i>FMR1</i>    | fragile X mental retardation 1              | rs1805420  | --                                                                          |
| 5  | <i>FSH</i>     | follicle stimulating hormone                | rs6169     | --                                                                          |
| 6  | <i>FSHR</i>    | follicle stimulating hormone receptor       | rs6166     | sterility (54), osteoporosis (55)                                           |
| 7  | <i>FST</i>     | follicle stimulating hormone receptor       | rs12152850 | --                                                                          |
| 8  | <i>FST</i>     | follicle stimulating hormone receptor       | rs3797297  | --                                                                          |
| 9  | <i>FST</i>     | follicle stimulating hormone receptor       | rs1421085  | obesity (56-58), mental disorders (59)                                      |
| 10 | <i>FTO</i>     | fat mass and obesity associated             | rs1435252  | nicotine addiction (60)                                                     |
| 11 | <i>GABBR2</i>  | γ-aminobutyric acid B receptor 2            | rs2779562  | nicotine addiction (60)                                                     |
| 12 | <i>GABBR2</i>  | γ-aminobutyric acid B receptor 2            | novel SNP  | Alzheimer's disease (61)                                                    |
| 13 | <i>GNRH1</i>   | gonadotropin-releasing hormone              | rs12913832 | eye color (62, 63)                                                          |
| 14 | <i>HERC</i>    | hect domain and RLD 2                       | rs1799945  | hemochromatosis(64)                                                         |
| 15 | <i>HFE</i>     | hemochromatosis                             | rs12602084 | steroid metabolism (65)                                                     |
| 16 | <i>HSD17B1</i> | estradiol 17β-dehydrogenase 1               | rs592389   | vasomotor symptoms (66), cognition (67)                                     |
| 17 | <i>HSD17B1</i> | estradiol 17β-dehydrogenase 1               | rs878567   | mood disorders (68)                                                         |
| 18 | <i>5-HTR1A</i> | 5-hydroxytryptamine (serotonin) receptor 1A | rs6312     | --                                                                          |
| 19 | <i>5-HTR2A</i> | 5-hydroxytryptamine (serotonin) receptor 2A | rs6314     | antidepressant response (69), bipolar disorder (70)                         |
| 20 | <i>5-HTR2A</i> | 5-hydroxytryptamine (serotonin) receptor 2A | rs7997012  | antidepressant response (71)                                                |
| 21 | <i>5-HTR2A</i> | 5-hydroxytryptamine (serotonin) receptor 2A | rs6318     | bipolar disorder (72), depression (73)                                      |
| 22 | <i>5-HTR2C</i> | 5-hydroxytryptamine (serotonin) receptor 2C | rs25533    | antidepressant response (74)                                                |
| 23 | <i>5-HTT</i>   | 5-hydroxytryptamine transporter             | rs8076005  | depressive symptoms (75)                                                    |
| 24 | <i>5-HTT</i>   | 5-hydroxytryptamine transporter             | rs12313279 | --                                                                          |
| 25 | <i>IGF1</i>    | insulin-like growth factor 1                | rs17561    | chronic rhinosinusitis (76), BMI (77)                                       |
| 26 | <i>IL1A</i>    | interleukin 1, alpha                        | rs1800795  | arthritis (78), breast cancer (79), diabetes (80), depression (81)          |
| 27 | <i>IL6</i>     | interleukin 6                               | rs2059693  | testicular cancer (82)                                                      |
| 28 | <i>INHA</i>    | inhibin alpha                               | rs35118453 | --                                                                          |
| 29 | <i>INHA</i>    | inhibin alpha                               | rs2237436  | --                                                                          |
| 30 | <i>INHBA</i>   | inhibin beta A                              | rs11902591 | --                                                                          |
| 31 | <i>INHBB</i>   | inhibin beta B                              | rs17070145 | Alzheimer's disease (83), episodic memory (84)                              |
| 32 | <i>KIBRA</i>   | kidney and brain protein (WWC1)             | rs1137100  | diabetes II (85), atherosclerosis (86)                                      |
| 33 | <i>LEPR</i>    | leptin receptor                             | rs4073366  | Alzheimer's disease (87)                                                    |
| 34 | <i>LHR</i>     | luteinizing hormone receptor                | rs3788862  | pain (88)                                                                   |
| 35 | <i>MAOA</i>    | monoamine oxidase A                         | rs2254298  | autism (89, 90), social loneliness (91), depressive symptoms & anxiety (92) |
| 36 | <i>OXTR</i>    | oxytocin receptor                           | rs707555   | diabetes II (93)                                                            |
| 37 | <i>PCK1</i>    | phosphoenolpyruvate carboxykinase 1         | rs1042838  | ovarian cancer (94), migraine (95), menstruation (96), pregnancy loss (97)  |
| 38 | <i>PGR</i>     | progesterone receptor                       | rs363050   | intelligence (98, 99)                                                       |
| 39 | <i>SNAP25</i>  | synaptosomal-associated protein 25          | rs2760118  | --                                                                          |
| 40 | <i>SSADH</i>   | succinic semialdehyde dehydrogenase         | rs3990403  | --                                                                          |
| 41 | <i>StAR</i>    | steroidogenic acute regulatory protein      | rs1937     | Alzheimer's disease (100)                                                   |
| 42 | <i>TFAM</i>    | transcription factor A, mitochondrial       | rs2306604  | Parkinson's disease (101)                                                   |
| 43 | <i>TFAM</i>    | transcription factor A, mitochondrial       | rs1799913  | heroin addiction (102)                                                      |
| 44 | <i>TPH1</i>    | first tryptophan hydroxylase isoform        |            |                                                                             |
| 45 |                |                                             |            |                                                                             |
| 46 |                |                                             |            |                                                                             |
| 47 |                |                                             |            |                                                                             |
| 48 |                |                                             |            |                                                                             |
| 49 |                |                                             |            |                                                                             |
| 50 |                |                                             |            |                                                                             |
| 51 |                |                                             |            |                                                                             |
| 52 |                |                                             |            |                                                                             |
| 53 |                |                                             |            |                                                                             |
| 54 |                |                                             |            |                                                                             |
| 55 |                |                                             |            |                                                                             |
| 56 |                |                                             |            |                                                                             |
| 57 |                |                                             |            |                                                                             |
| 58 |                |                                             |            |                                                                             |
| 59 |                |                                             |            |                                                                             |
| 60 |                |                                             |            |                                                                             |

TPH2

first tryptophan hydroxylase isoform

rs11178997

bipolar disorder (103), PTSD symptoms (104)

## REFERENCES

1. Zappia M, Manna I, Serra P, Cittadella R, Andreoli V, La Russa A, et al. Increased risk for Alzheimer disease with the interaction of MPO and A2M polymorphisms. *Arch Neurol*. 2004 Mar;61(3):341-4.
2. Moses EK, Fitzpatrick E, Freed KA, Dyer TD, Forrest S, Elliott K, et al. Objective prioritization of positional candidate genes at a quantitative trait locus for pre-eclampsia on 2q22. *Molecular Human Reproduction*. 2006 August 2006;12(8):505-12.
3. Hara K, Boutin P, Mori Y, Tobe K, Dina C, Yasuda K, et al. Genetic Variation in the Gene Encoding Adiponectin Is Associated With an Increased Risk of Type 2 Diabetes in the Japanese Population. *Diabetes*. 2002 February 1, 2002;51(2):536-40.
4. Gu HF, Abulaiti A, Ostenson CG, Humphreys K, Wahlestedt C, Brookes AJ, et al. Single nucleotide polymorphisms in the proximal promoter region of the adiponectin (APM1) gene are associated with type 2 diabetes in Swedish caucasians. *Diabetes*. 2004 Feb;53 Suppl 1:S31-5.
5. Bouatia-Naji N, Meyre D, Lobbens S, Seron K, Fumeron F, Balkau B, et al. ACDC/adiponectin polymorphisms are associated with severe childhood and adult obesity. *Diabetes*. 2006 Feb;55(2):545-50.
6. Yang W-S, Yang Y-C, Chen C-L, Wu I-L, Lu J-Y, Lu F-H, et al. Adiponectin SNP276 is associated with obesity, the metabolic syndrome, and diabetes in the elderly. *The American Journal of Clinical Nutrition*. 2007 August 1, 2007;86(2):509-13.
7. Kaklamani VG, Sadim M, Hsi A, Offit K, Oddoux C, Ostrer H, et al. Variants of the adiponectin and adiponectin receptor 1 genes and breast cancer risk. *Cancer Res*. 2008 May 1;68(9):3178-84.
8. Beckers S, Peeters AV, De Freitas F, Mertens IL, Verhulst SL, Haentjens D, et al. Association Study and Mutation Analysis of Adiponectin Shows Association of Variants in APM1 with Complex Obesity in Women. *Annals of Human Genetics*. 2009;73(5):492-501.
9. Young WL, Kwok P-Y, Pawlikowska L, Lawton MT, Kim H, Hysi PG, et al. Arteriovenous Malformation. *Journal of Neurosurgery*. 2007;106(4):731-2.
10. Petersen KF, Dufour S, Hariri A, Nelson-Williams C, Foo JN, Zhang X-M, et al. Apolipoprotein C3 Gene Variants in Nonalcoholic Fatty Liver Disease. *New England Journal of Medicine*. 2010;362(12):1082-9.
11. Corder EH, Saunders AM, Strittmatter WJ, Schmechel DE, Gaskell PC, Small GW, et al. Gene dose of apolipoprotein E type 4 allele and the risk of Alzheimer's disease in late onset families. *Science*. 1993;261(5123):921-3.
12. Saunders AM, Strittmatter WJ, Schmechel D, George-Hyslop PH, Pericak-Vance MA, Joo SH, et al. Association of apolipoprotein E allele epsilon 4 with late-onset familial and sporadic Alzheimer's disease. *Neurology*. 1993;43(8):1467-72.
13. Ellis JA, Stebbing M, Harrap SB. Polymorphism of the Androgen Receptor Gene is Associated with Male Pattern Baldness. 2001;116(3):452-5.
14. Kang H, Lee SK, Cho S-W, Lee S-H, Kwack K. Branched chain [alpha]-keto acid dehydrogenase, E1-[beta] subunit gene is associated with premature ovarian failure. *Fertility and Sterility*. 2008;89(3):728-31.

15. Hwang J-P, Tsai S-J, Hong C-J, Yang C-H, Lirng J-F, Yang Y-M. The Val66Met polymorphism of the brain-derived neurotrophic-factor gene is associated with geriatric depression. *Neurobiology of Aging*. 2006;27(12):1834-7.
16. Czira ME, Wersching H, Baune BT, Berger K. Brain-derived neurotrophic factor gene polymorphisms, neurotransmitter levels, and depressive symptoms in an elderly population. *Age (Dordr)*. 2011 Sep 7.
17. Suchanek R, Owczarek A, Kowalczyk M, Kucia K, Kowalski J. Association between C-281A and val66met functional polymorphisms of BDNF gene and risk of recurrent major depressive disorder in Polish population. *J Mol Neurosci*. 2011 Mar;43(3):524-30.
18. Su N, Zhang L, Fei F, Hu H, Wang K, Hui H, et al. The brain-derived neurotrophic factor is associated with alcohol dependence-related depression and antidepressant response. *Brain Research*. 2011;1415(0):119-26.
19. Sears C, Markie D, Olds R, Fitches A. Evidence of associations between bipolar disorder and the brain-derived neurotrophic factor (BDNF) gene. *Bipolar Disorders*. 2011;13(7-8):630-7.
20. Zakharyan R, Boyajyan A, Arakelyan A, Gevorgyan A, Mrazek F, Petrek M. Functional variants of the genes involved in neurodevelopment and susceptibility to schizophrenia in an Armenian population. *Human Immunology*. 2011;72(9):746-8.
21. McAllister TW, Tyler AL, Flashman LA, Rhodes CH, McDonald BC, Saykin AJ, et al. Polymorphisms in the brain-derived neurotrophic factor gene influence memory and processing speed one month after brain injury. *J Neurotrauma*. 2012 Apr 10;29(6):1111-8.
22. Hong K-W, Lim J-E, Go MJ, Shin Cho Y, Ahn Y, Han B-G, et al. Recapitulation of the Association of the Val66Met Polymorphism of BDNF Gene With BMI in Koreans. *Obesity*. 2011.
23. Gratacos M, Soria V, Urretavizcaya M, Gonzalez JR, Crespo JM, Bayes M, et al. A brain-derived neurotrophic factor (BDNF) haplotype is associated with antidepressant treatment outcome in mood disorders. *Pharmacogenomics J*. 2007;8(2):101-12.
24. Johnson N, Fletcher O, Palles C, Rudd M, Webb E, Sellick G, et al. Counting potentially functional variants in BRCA1, BRCA2 and ATM predicts breast cancer susceptibility. *Human Molecular Genetics*. 2007 May 1, 2007;16(9):1051-7.
25. Wang JC, Hinrichs AL, Stock H, Budde J, Allen R, Bertelsen S, et al. Evidence of common and specific genetic effects: association of the muscarinic acetylcholine receptor M2 (CHRM2) gene with alcohol dependence and major depressive syndrome. *Human Molecular Genetics*. 2004 September 1, 2004;13(17):1903-11.
26. Jones KA, Porjesz B, Almasy L, Bierut L, Goate A, Wang JC, et al. Linkage and linkage disequilibrium of evoked EEG oscillations with CHRM2 receptor gene polymorphisms: implications for human brain dynamics and cognition. *International Journal of Psychophysiology*. 2004;53(2):75-90.
27. Eisenberg J, Mei-Tal G, Steinberg A, Tartakovsky E, Zohar A, Gritsenko I, et al. Haplotype relative risk study of catechol-O-methyltransferase (COMT) and attention deficit hyperactivity disorder (ADHD): Association of the high-enzyme activity val allele with adhd impulsive-hyperactive phenotype. *American Journal of Medical Genetics*. 1999;88(5):497-502.
28. Wang T, Franke P, Neidt H, Cichon S, Knapp M, Lichtermann D, et al. Association study of the low-activity allele of catechol-O-methyltransferase and alcoholism using a family-based approach. *Mol Psychiatry*. 2001 Jan;6(1):109-11.
29. Horowitz R, Kotler M, Shufman E, Aharoni S, Kremer I, Cohen H, et al. Confirmation of an excess of the high enzyme activity COMT val allele in heroin addicts in a family-based haplotype relative risk study. *American Journal of Medical Genetics*. 2000;96(5):599-603.

- 1  
2  
3  
4  
5  
6  
7  
8  
9  
10  
11  
12  
13  
14  
15  
16  
17  
18  
19  
20  
21  
22  
23  
24  
25  
26  
27  
28  
29  
30  
31  
32  
33  
34  
35  
36  
37  
38  
39  
40  
41  
42  
43  
44  
45  
46  
47  
48  
49  
50  
51  
52  
53  
54  
55  
56  
57  
58  
59  
60
30. Vandenberg DJ, Rodriguez LA, Miller IT, Uhl GR, Lachman HM. High-activity catechol-O-methyltransferase allele is more prevalent in polysubstance abusers. *American Journal of Medical Genetics*. 1997;74(4):439-42.
  31. Li T, Chen C-k, Hu X, Ball D, Lin S-K, Chen W, et al. Association analysis of the DRD4 and COMT genes in methamphetamine abuse. *American Journal of Medical Genetics Part B: Neuropsychiatric Genetics*. 2004;129B(1):120-4.
  32. Åberg E, Fandiño-Losada A, Sjöholm LK, Forsell Y, Lavebratt C. The functional Val158Met polymorphism in catechol-O-methyltransferase (COMT) is associated with depression and motivation in men from a Swedish population-based study. *Journal of Affective Disorders*. 2011;129(1–3):158-66.
  33. Baune BT, Hohoff C, Berger K, Neumann A, Mortensen S, Roehrs T, et al. Association of the COMT val158met Variant with Antidepressant Treatment Response in Major Depression. *Neuropsychopharmacology*. 2007;33(4):924-32.
  34. Lee S-Y, Chen S-L, Chen S-H, Huang S-Y, Tzeng N-S, Chang Y-H, et al. The COMT and DRD3 genes interacted in bipolar I but not bipolar II disorder. *World Journal of Biological Psychiatry*. 2011;12(5):385-91.
  35. Dickinson D, Elvevåg B. Genes, cognition and brain through a COMT lens. *Neuroscience*. 2009;164(1):72-87.
  36. Albayrak Ö, Tirniceriu A, Riemenschneider M, Kurz A, Scherag A, Egensperger R. The Cathepsin D (224C/T) Polymorphism Confers an Increased Risk to Develop Alzheimer's Disease in Men. *The Journals of Gerontology Series A: Biological Sciences and Medical Sciences*. 2010 March 1, 2010;65A(3):219-24.
  37. Yaspan BL, Breyer JP, Cai Q, Dai Q, Elmore JB, Amundson I, et al. Haplotype Analysis of CYP11A1 Identifies Promoter Variants Associated with Breast Cancer Risk. *Cancer Research*. 2007 June 15, 2007;67(12):5673-82.
  38. Tu Y, Cui G, Xu Y, Bao X, Wang X, Wang D. Genetic polymorphism of CYP11B2 gene and stroke in the Han Chinese population and a meta-analysis. *Pharmacogenet Genomics*. 2011;21(3):115-20.
  39. White PC, Hautanen A, Kupari M. Aldosterone synthase (CYP11B2) polymorphisms and cardiovascular function. *J Steroid Biochem Mol Biol*. 1999;69(1-6):409-12.
  40. Brookes K, Xu X, Chen W, Zhou K, Neale B, Lowe N, et al. The analysis of 51 genes in DSM-IV combined type attention deficit hyperactivity disorder: association signals in DRD4, DAT1 and 16 other genes. *Mol Psychiatry*. 2006;11(10):934-53.
  41. Le Strat Y, Ramoz N, Pickering P, Burger V, Boni C, Aubin H-J, et al. The 3' Part of the Dopamine Transporter Gene DAT1/SLC6A3 Is Associated With Withdrawal Seizures in Patients With Alcohol Dependence. *Alcoholism: Clinical and Experimental Research*. 2008;32(1):27-35.
  42. Callicott JH, Straub RE, Pezawas L, Egan MF, Mattay VS, Hariri AR, et al. Variation in DISC1 affects hippocampal structure and function and increases risk for schizophrenia. *Proc Natl Acad Sci U S A*. 2005;102(24):8627-32.
  43. Thomson PA, Harris SE, Starr JM, Whalley LJ, Porteous DJ, Deary IJ. Association between genotype at an exonic SNP in DISC1 and normal cognitive aging. *Neuroscience Letters*. 2005;389(1):41-5.
  44. Blum K, Braverman ER, Wood RC, Gill J, Li C, Chen TJ, et al. Increased prevalence of the Taq I A1 allele of the dopamine receptor gene (DRD2) in obesity with comorbid substance use disorder: a preliminary report. *Pharmacogenetics*. 1996 Aug;6(4):297-305.
  45. Dubertret C, Bardel C, Ramoz N, Martin P-M, Deybach J-C, Adès J, et al. A genetic schizophrenia-susceptibility region located between the ANKK1 and DRD2 genes. *Progress in Neuro-Psychopharmacology and Biological Psychiatry*. 2010;34(3):492-9.
  46. Monakhov M, Golimbet V, Abramova L, Kaleda V, Karpov V. Association study of three polymorphisms in the dopamine D2 receptor gene and schizophrenia in the Russian population. *Schizophrenia Research*. 2008;100(1–3):302-7.

- 1  
2  
3  
4  
5  
6  
7  
8  
9  
10  
11  
12  
13  
14  
15  
16  
17  
18  
19  
20  
21  
22  
23  
24  
25  
26  
27  
28  
29  
30  
31  
32  
33  
34  
35  
36  
37  
38  
39  
40  
41  
42  
43  
44  
45  
46  
47  
48  
49  
50  
51  
52  
53  
54  
55  
56  
57  
58  
59  
60
47. Voisey J, Swagell CD, Hughes IP, Morris CP, van Daal A, Noble EP, et al. The DRD2 gene 957C>T polymorphism is associated with Posttraumatic Stress Disorder in war veterans. *Depression and Anxiety*. 2009;26(1):28-33.
48. Yang J-W, Jang W-S, Hong SD, Ji YI, Kim DH, Park J, et al. A case-control association study of the polymorphism at the promoter region of the DRD4 gene in Korean boys with attention deficit-hyperactivity disorder: Evidence of association with the - 521 C/T SNP. *Progress in Neuro-Psychopharmacology and Biological Psychiatry*. 2008;32(1):243-8.
49. Lai JH, Zhu YS, Huo ZH, Sun RF, Yu B, Wang YP, et al. Association study of polymorphisms in the promoter region of DRD4 with schizophrenia, depression, and heroin addiction. *Brain Research*. 2010;1359:227-32.
50. Funke B, Finn CT, Plocik AM, Lake S, DeRosse P, Kane JM, et al. Association of the DTNBP1 Locus with Schizophrenia in a U.S. Population. *The American Journal of Human Genetics*. 2004;75(5):891-8.
51. Burdick KE, Lencz T, Funke B, Finn CT, Szeszko PR, Kane JM, et al. Genetic variation in DTNBP1 influences general cognitive ability. *Human Molecular Genetics*. 2006 15 May 2006;15(10):1563-8.
52. Riley B, Kuo P-H, Maher BS, Fanous AH, Sun J, Wormley B, et al. The dystrobrevin binding protein 1 (DTNBP1) gene is associated with schizophrenia in the Irish Case Control Study of Schizophrenia (ICCS) sample. *Schizophrenia Research*. 2009;115(2-3):245-53.
53. Caspi A, Williams B, Kim-Cohen J, Craig IW, Milne BJ, Poulton R, et al. Moderation of breastfeeding effects on the IQ by genetic variation in fatty acid metabolism. *Proc Natl Acad Sci U S A*. 2007 Nov 20;104(47):18860-5.
54. Binder H, Dittrich R, Hager I, Muller A, Oeser S, Beckmann MW, et al. Association of FSH receptor and CYP19A1 gene variations with sterility and ovarian hyperstimulation syndrome. *Reproduction*. 2008;135(1):107-16.
55. Rendina D, Gianfrancesco F, De Filippo G, Merlotti D, Esposito T, Mingione A, et al. FSHR gene polymorphisms influence bone mineral density and bone turnover in postmenopausal women. *Eur J Endocrinol*. 2010;163(1):165-72.
56. Dina C, Meyre D, Gallina S, Durand E, Korner A, Jacobson P, et al. Variation in FTO contributes to childhood obesity and severe adult obesity. *Nat Genet*. 2007;39(6):724-6.
57. Tung Y-CL, Yeo GSH. From GWAS to biology: lessons from FTO. *Annals of the New York Academy of Sciences*. 2011;1220(1):162-71.
58. Chabris C, Hebert B, Benjamin D, Beauchamp J, Cesarini D, van der Loos M, et al. Most reported genetic associations with general intelligence are probably false positives. *Psychological Science*. 2011;In press.
59. Kivimaki M, Jokela M, Hamer M, Geddes J, Ebmeier K, Kumari M, et al. Examining Overweight and Obesity as Risk Factors for Common Mental Disorders Using Fat Mass and Obesity-Associated (FTO) Genotype-Instrumented Analysis. *Am J Epidemiol*. 2011 Feb 15;173(4):421-9.
60. Beuten J, Ma JZ, Payne TJ, Dupont RT, Crews KM, Somes G, et al. Single- and Multilocus Allelic Variants within the GABAB Receptor Subunit 2 (GABAB2) Gene Are Significantly Associated with Nicotine Dependence. *The American Journal of Human Genetics*. 2005;76(5):859-64.
61. Wilson AC. Investigations into gonadotropin-releasing hormone receptor signaling in extrahypothalamic neurons of the brain: Implications for normal cognition and the pathogenesis of Alzheimer's disease: Thesis. University of Wisconsin, Madison, USA; 2009.
62. Eiberg H, Troelsen J, Nielsen M, Mikkelsen A, Mengel-From J, Kjaer K, et al. Blue eye color in humans may be caused by a perfectly associated founder mutation in a regulatory element located within the HERC2 gene inhibiting OCA2 expression. *Human Genetics*. 2008;123(2):177-87.

- 1  
2  
3  
4  
5  
6  
7  
8  
9  
10  
11  
12  
13  
14  
15  
16  
17  
18  
19  
20  
21  
22  
23  
24  
25  
26  
27  
28  
29  
30  
31  
32  
33  
34  
35  
36  
37  
38  
39  
40  
41  
42  
43  
44  
45  
46  
47  
48  
49  
50  
51  
52  
53  
54  
55  
56  
57  
58  
59  
60
63. Sturm RA, Duffy DL, Zhao ZZ, Leite FPN, Stark MS, Hayward Nicholas K, et al. A Single SNP in an Evolutionary Conserved Region within Intron 86 of the HERC2 Gene Determines Human Blue-Brown Eye Color. *The American Journal of Human Genetics*. 2008;82(2):424-31.
64. Beutler E. The significance of the 187G (H63D) mutation in hemochromatosis. *Am J Hum Genet*. 1997 Sep;61(3):762-4.
65. Sun T, Oh WK, Jacobus S, Regan M, Pomerantz M, Freedman ML, et al. The Impact of Common Genetic Variations in Genes of the Sex Hormone Metabolic Pathways on Steroid Hormone Levels and Prostate Cancer Aggressiveness. *Cancer Prevention Research*. 2011 December 1, 2011;4(12):2044-50.
66. Crandall CJ, Crawford SL, Gold EB. Vasomotor Symptom Prevalence Is Associated with Polymorphisms in Sex Steroid-Metabolizing Enzymes and Receptors. *The American Journal of Medicine*. 2006;119(9, Supplement 1):S52-S60.
67. Kravitz HM, Meyer PM, Seeman TE, Greendale GA, Sowers MR. Cognitive Functioning and Sex Steroid Hormone Gene Polymorphisms in Women at Midlife. *The American Journal of Medicine*. 2006;119(9, Supplement 1):S94-S102.
68. Brezo J, Bureau A, Merette C, Jomphe V, Barker ED, Vitaro F, et al. Differences and similarities in the serotonergic diathesis for suicide attempts and mood disorders: a 22-year longitudinal gene-environment study. *Mol Psychiatry*. 2010;15(8):831-43.
69. Wilkie MJV, Smith G, Day RK, Matthews K, Smith D, Blackwood D, et al. Polymorphisms in the SLC6A4 and HTR2A genes influence treatment outcome following antidepressant therapy. *Pharmacogenomics J*. 2008;9(1):61-70.
70. McAuley EZ, Fullerton JM, Blair IP, Donald JA, Mitchell PB, Schofield PR. Association between the serotonin 2A receptor gene and bipolar affective disorder in an Australian cohort. *Psychiatr Genet*. 2009 Oct;19(5):244-52.
71. McMahon FJ, Buervenich S, Charney D, Lipsky R, Rush AJ, Wilson AF, et al. Variation in the Gene Encoding the Serotonin 2A Receptor Is Associated with Outcome of Antidepressant Treatment. *The American Journal of Human Genetics*. 2006;78(5):804-14.
72. Mazza M, Mandelli L, Martinotti G, Di Nicola M, Tavian D, Negri G, et al. Further evidence supporting the association between 5HT2C gene and bipolar disorder. *Psychiatry Res*. 2010 Dec 30;180(2-3):151-2.
73. Lerer B, Macciardi F, Segman RH, Adolfsson R, Blackwood D, Blairy S, et al. Variability of 5-HT2C receptor cys23ser polymorphism among European populations and vulnerability to affective disorder. *Mol Psychiatry*. 2001 Sep;6(5):579-85.
74. Lin E, Chen PS, Chang HH, Gean P-W, Tsai HC, Yang YK, et al. Interaction of serotonin-related genes affects short-term antidepressant response in major depressive disorder. *Progress in Neuro-Psychopharmacology and Biological Psychiatry*. 2009;33(7):1167-72.
75. Su S, Zhao J, Bremner JD, Miller AH, Tang W, Bouzyk M, et al. Serotonin Transporter Gene, Depressive Symptoms, and Interleukin-6 / CLINICAL PERSPECTIVE. *Circulation: Cardiovascular Genetics*. 2009 December 1, 2009;2(6):614-20.
76. Mfuna Endam L, Cormier C, Bosse Y, Filali-Mouhim A, Desrosiers M. Association of IL1A, IL1B, and TNF Gene Polymorphisms With Chronic Rhinosinusitis With and Without Nasal Polyposis: A Replication Study. *Arch Otolaryngol Head Neck Surg*. 2010 February 1, 2010;136(2):187-92.
77. Um J-Y, Rim H-K, Kim S-J, Kim H-L, Hong S-H. Functional Polymorphism of IL-1 Alpha and Its Potential Role in Obesity in Humans and Mice. *PLoS ONE*. 2011;6(12):e29524.
78. Fishman D, Faulds G, Jeffery R, Mohamed-Ali V, Yudkin JS, Humphries S, et al. The effect of novel polymorphisms in the interleukin-6 (IL-6) gene on IL-6 transcription and plasma IL-6 levels, and an association with systemic-onset juvenile chronic arthritis. *The Journal of Clinical Investigation*. 1998;102(7):1369-76.

- 1  
2  
3 79. Slattery ML, Curtin K, Sweeney C, Wolff RK, Baumgartner RN, Baumgartner KB, et al. Modifying  
4 Effects of IL-6 Polymorphisms on Body Size-Associated Breast Cancer Risk. *Obesity*. 2008;16(2):339-47.  
5 80. Huth C, Heid IM, Vollmert C, Gieger C, Grallert H, Wolford JK, et al. IL6 Gene Promoter  
6 Polymorphisms and Type 2 Diabetes. *Diabetes*. 2006 October 2006;55(10):2915-21.  
7 81. Bull SJ, Huezo-Diaz P, Binder EB, Cubells JF, Ranjith G, Maddock C, et al. Functional  
8 polymorphisms in the interleukin-6 and serotonin transporter genes, and depression and fatigue  
9 induced by interferon-alpha and ribavirin treatment. *Mol Psychiatry*. 2009 Dec;14(12):1095-104.  
10 82. Purdue MP, Graubard BI, Chanock SJ, Rubertone MV, Erickson RL, McGlynn KA. Genetic  
11 Variation in the Inhibin Pathway and Risk of Testicular Germ Cell Tumors. *Cancer Research*. 2008 April  
12 15, 2008;68(8):3043-8.  
13 83. Rodríguez-Rodríguez E, Infante J, Llorca J, Mateo I, Sánchez-Quintana C, García-Gorostiaga I, et  
14 al. Age-dependent association of KIBRA genetic variation and Alzheimer's disease risk. *Neurobiology of*  
15 *Aging*. 2009;30(2):322-4.  
16 84. Almeida OP, Schwab SG, Lautenschlager NT, Morar B, Greenop KR, Flicker L, et al. KIBRA genetic  
17 polymorphism influences episodic memory in later life, but does not increase the risk of mild cognitive  
18 impairment. *Journal of Cellular and Molecular Medicine*. 2008;12(5a):1672-6.  
19 85. Salopuro T, Pulkkinen L, Lindstrom J, Eriksson JG, Valle TT, Hamalainen H, et al. Genetic variation  
20 in leptin receptor gene is associated with type 2 diabetes and body weight: The Finnish Diabetes  
21 Prevention Study. *Int J Obes Relat Metab Disord*. 2005;29(10):1245-51.  
22 86. Saukko M, Kesaniemi YA, Ukkola O. Leptin receptor Lys109Arg and Gln223Arg polymorphisms  
23 are associated with early atherosclerosis. *Metab Syndr Relat Disord*. 2010;8(5):425-30.  
24 87. Haasl R, Ahmadi MR, Meethal S, Gleason C, Johnson S, Asthana S, et al. A luteinizing hormone  
25 receptor intronic variant is significantly associated with decreased risk of Alzheimer's disease in males  
26 carrying an apolipoprotein E epsilon4 allele. *BMC Medical Genetics*. 2008;9(1):37.  
27 88. Kim H, Lee H, Rowan J, Brahim J, Dionne R. Genetic polymorphisms in monoamine  
28 neurotransmitter systems show only weak association with acute post-surgical pain in humans.  
29 *Molecular Pain*. 2006;2(1):24.  
30 89. Lerer E, Levi S, Salomon S, Darvasi A, Yirmiya N, Ebstein RP. Association between the oxytocin  
31 receptor (OXTR) gene and autism: relationship to Vineland Adaptive Behavior Scales and cognition. *Mol*  
32 *Psychiatry*. 2007;13(10):980-8.  
33 90. Liu X, Kawamura Y, Shimada T, Otowa T, Koishi S, Sugiyama T, et al. Association of the oxytocin  
34 receptor (OXTR) gene polymorphisms with autism spectrum disorder (ASD) in the Japanese population. *J*  
35 *Hum Genet*. 2010;55(3):137-41.  
36 91. Lucht MJ, Barnow S, Sonnenfeld C, Rosenberger A, Grabe HJ, Schroeder W, et al. Associations  
37 between the oxytocin receptor gene (OXTR) and affect, loneliness and intelligence in normal subjects.  
38 *Progress in Neuro-Psychopharmacology and Biological Psychiatry*. 2009;33(5):860-6.  
39 92. Thompson RJ, Parker KJ, Hallmayer JF, Waugh CE, Gotlib IH. Oxytocin receptor gene  
40 polymorphism (rs2254298) interacts with familial risk for psychopathology to predict symptoms of  
41 depression and anxiety in adolescent girls. *Psychoneuroendocrinology*. 2011;36(1):144-7.  
42 93. Dong Y, Zhang H, Wang X, Feng Q, Chen X, Su Q. A Leu184Val polymorphism in PCK1 gene is  
43 associated with type 2 diabetes in Eastern Chinese population with BMI < 23 kg/m<sup>2</sup>. *Diabetes Research*  
44 *and Clinical Practice*. 2009;83(2):227-32.  
45 94. Pearce CL, Hirschhorn JN, Wu AH, Burt NP, Stram DO, Young S, et al. Clarifying the PROGENS  
46 Allele Association in Ovarian and Breast Cancer Risk: A Haplotype-Based Analysis. *Journal of the National*  
47 *Cancer Institute*. 2005 January 5, 2005;97(1):51-9.  
48  
49  
50  
51  
52  
53  
54  
55  
56  
57  
58  
59  
60

- 1  
2  
3  
4  
5  
6  
7  
8  
9  
10  
11  
12  
13  
14  
15  
16  
17  
18  
19  
20  
21  
22  
23  
24  
25  
26  
27  
28  
29  
30  
31  
32  
33  
34  
35  
36  
37  
38  
39  
40  
41  
42  
43  
44  
45  
46  
47  
48  
49  
50  
51  
52  
53  
54  
55  
56  
57  
58  
59  
60
95. Joshi G, Pradhan S, Mittal B. Role of the oestrogen receptor (ESR1 PvuII and ESR1 325 C→G) and progesterone receptor (PROGINS) polymorphisms in genetic susceptibility to migraine in a North Indian population. *Cephalalgia*. 2010 March 1, 2010;30(3):311-20.
96. Taylor KC, Small CM, Epstein MP, Sherman SL, Tang W, Wilson MM, et al. Associations of Progesterone Receptor Polymorphisms with Age at Menarche and Menstrual Cycle Length. *Hormone Research in Paediatrics*. 2010;74(6):421-7.
97. Su MT, Lee IW, Chen YC, Kuo PL. Association of progesterone receptor polymorphism with idiopathic recurrent pregnancy loss in Taiwanese Han population. *J Assist Reprod Genet*. 2011 Mar;28(3):239-43.
98. Gosso MF, de Geus EJC, van Belzen MJ, Polderman TJC, Heutink P, Boomsma DI, et al. The SNAP-25 gene is associated with cognitive ability: evidence from a family-based study in two independent Dutch cohorts. *Mol Psychiatry*. 2006;11(9):878-86.
99. Gosso MF, De Geus EJC, Polderman TJC, Boomsma DI, Heutink P, Posthuma D. Common variants underlying cognitive ability: further evidence for association between the SNAP-25 gene and cognition using a family-based study in two independent Dutch cohorts. *Genes, Brain and Behavior*. 2008;7(3):355-64.
100. Zhang Q, Yu J-T, Wang P, Chen W, Wu Z-C, Jiang H, et al. Mitochondrial transcription factor A (TFAM) polymorphisms and risk of late-onset Alzheimer's disease in Han Chinese. *Brain Research*. 2011;1368(0):355-60.
101. Gaweda-Walerych K, Safranow K, Maruszak A, Bialecka M, Klodowska-Duda G, Czyzewski K, et al. Mitochondrial transcription factor A variants and the risk of Parkinson's disease. *Neuroscience Letters*. 2010;469(1):24-9.
102. Nielsen DA, Barral S, Proudnikov D, Kellogg S, Ho A, Ott J, et al. TPH2 and TPH1: association of variants and interactions with heroin addiction. *Behav Genet*. 2008 Mar;38(2):133-50.
103. Cichon S, Winge I, Mattheisen M, Georgi A, Karpushova A, Freudenberg J, et al. Brain-specific tryptophan hydroxylase 2 (TPH2): a functional Pro206Ser substitution and variation in the 5'-region are associated with bipolar affective disorder. *Human Molecular Genetics*. 2008 January 1, 2008;17(1):87-97.
104. Goenjian AK, Bailey JN, Walling DP, Steinberg AM, Schmidt D, Dandekar U, et al. Association of TPH1, TPH2, and 5HTTLPR with PTSD and depressive symptoms. *Journal of Affective Disorders*. 2012(in Press).



1  
2  
3  
4  
5  
6  
7  
8  
9  
10  
11  
12  
13  
14  
15  
16  
17  
18  
19  
20  
21  
22  
23  
24  
25  
26  
27  
28  
29  
30  
31  
32  
33  
34  
35  
36  
37  
38  
39  
40  
41  
42  
43  
44  
45  
46  
47  
48  
49

**Supplementary Table 2.** Depression-Associated SNP Identified in the WLS

| Gene              | Encodes                                                            | SNP       | Alleles | Chr#/Location      | Residue   | Associated disease/behavior                                        |
|-------------------|--------------------------------------------------------------------|-----------|---------|--------------------|-----------|--------------------------------------------------------------------|
| <i>ACVR2B</i>     | activin receptor IIB                                               | rs3749386 | T/C     | 3/intron 1         | --        | left-right axis malformations*(1)                                  |
| <i>APOC3</i>      | apolipoprotein C-III                                               | rs2854116 | T/C     | 11/promoter (-455) | --        | nonalcoholic fatty liver disease(2)                                |
| <i>DRD2/ANKK1</i> | dopamine receptor D2/ankyrin repeat and kinase domain containing 1 | rs1800497 | C/T     | 11/exon (ANKK1)    | Glu713Lys | obesity, drug addiction (3)                                        |
| <i>DRD2</i>       | dopamine receptor D2                                               | rs2242592 | T/C     | 11/3'              | --        | schizophrenia (4)                                                  |
| <i>FTO</i>        | fat mass and obesity associated                                    | rs1421085 | T/C     | 16/intron 1        | --        | obesity (5-7), mental disorders (8)                                |
| <i>GNRH1</i>      | gonadotropin-releasing hormone                                     | novel SNP | T/C     | 8/promoter         | --        | Alzheimer's disease (9)                                            |
| <i>IL6</i>        | interleukin 6                                                      | rs1800795 | C/G     | 7/promoter (-174)  | --        | arthritis (10), breast cancer (11), diabetes (12), depression (13) |

Gene association only

Peer review only

## References

1. Kosaki R, Gebbia M, Kosaki K, Lewin M, Bowers P, Towbin JA, et al. Left–right axis malformations associated with mutations in ACVR2B, the gene for human activin receptor type IIB. *American Journal of Medical Genetics*. 1999;82(1):70-6.
2. Petersen KF, Dufour S, Hariri A, Nelson-Williams C, Foo JN, Zhang X-M, et al. Apolipoprotein C3 Gene Variants in Nonalcoholic Fatty Liver Disease. *New England Journal of Medicine*. 2010;362(12):1082-9.
3. Blum K, Braverman ER, Wood RC, Gill J, Li C, Chen TJ, et al. Increased prevalence of the Taq I A1 allele of the dopamine receptor gene (DRD2) in obesity with comorbid substance use disorder: a preliminary report. *Pharmacogenetics*. 1996 Aug;6(4):297-305.
4. Dubertret C, Bardel C, Ramoz N, Martin P-M, Deybach J-C, Adès J, et al. A genetic schizophrenia-susceptibility region located between the ANKK1 and DRD2 genes. *Progress in Neuro-Psychopharmacology and Biological Psychiatry*. 2010;34(3):492-9.
5. Dina C, Meyre D, Gallina S, Durand E, Korner A, Jacobson P, et al. Variation in FTO contributes to childhood obesity and severe adult obesity. *Nat Genet*. 2007;39(6):724-6.
6. Tung Y-CL, Yeo GSH. From GWAS to biology: lessons from FTO. *Annals of the New York Academy of Sciences*. 2011;1220(1):162-71.
7. Chabris C, Hebert B, Benjamin D, Beauchamp J, Cesarini D, van der Loos M, et al. Most reported genetic associations with general intelligence are probably false positives. *Psychological Science*. 2011;In press.
8. Kivimaki M, Jokela M, Hamer M, Geddes J, Ebmeier K, Kumari M, et al. Examining Overweight and Obesity as Risk Factors for Common Mental Disorders Using Fat Mass and Obesity-Associated (FTO) Genotype-Instrumented Analysis. *Am J Epidemiol*. 2011 Feb 15;173(4):421-9.
9. Wilson AC. Investigations into gonadotropin-releasing hormone receptor signaling in extrahypothalamic neurons of the brain: Implications for normal cognition and the pathogenesis of Alzheimer's disease: Thesis. University of Wisconsin, Madison, USA; 2009.
10. Fishman D, Faulds G, Jeffery R, Mohamed-Ali V, Yudkin JS, Humphries S, et al. The effect of novel polymorphisms in the interleukin-6 (IL-6) gene on IL-6 transcription and plasma IL-6 levels, and an association with systemic-onset juvenile chronic arthritis. *The Journal of Clinical Investigation*. 1998;102(7):1369-76.
11. Slattery ML, Curtin K, Sweeney C, Wolff RK, Baumgartner RN, Baumgartner KB, et al. Modifying Effects of IL-6 Polymorphisms on Body Size-Associated Breast Cancer Risk. *Obesity*. 2008;16(2):339-47.
12. Huth C, Heid IM, Vollmert C, Gieger C, Grallert H, Wolford JK, et al. IL6 Gene Promoter Polymorphisms and Type 2 Diabetes. *Diabetes*. 2006 October 2006;55(10):2915-21.
13. Bull SJ, Huezo-Diaz P, Binder EB, Cubells JF, Ranjith G, Maddock C, et al. Functional polymorphisms in the interleukin-6 and serotonin transporter genes, and depression and fatigue induced by interferon-alpha and ribavirin treatment. *Mol Psychiatry*. 2009 Dec;14(12):1095-104.

1  
2  
3  
4  
5  
6  
7  
8 **Multi-Gene Interactions and the Prediction of Depression in the Wisconsin**  
9 **Longitudinal Study**  
10  
11  
12  
13

14 Nicholas S. Roetker<sup>1</sup>, James A. Yonker<sup>1</sup>, Chee Lee<sup>1</sup>, Vicky Chang<sup>1</sup>, Jacob Basson<sup>2</sup>, Carol L. Roan<sup>1</sup>,  
15 Taissa S. Hauser<sup>1</sup>, Robert M. Hauser<sup>1</sup> and Craig S. Atwood<sup>2,3</sup>.  
16  
17  
18  
19

20 <sup>1</sup>Department of Sociology, University of Wisconsin-Madison, Madison, WI 53706, USA.  
21

22 <sup>2</sup>Geriatric Research, Education and Clinical Center, Veterans Administration Hospital and Department of  
23 Medicine, University of Wisconsin-Madison School of Medicine and Public Health, Madison, WI 53705,  
24 USA.  
25  
26  
27

28 <sup>3</sup>School of Exercise, Biomedical and Health Sciences, Edith Cowan University, Joondalup, 6027 WA,  
29 Australia.  
30  
31

32 **Running title:** Gene interactions and depression  
33

34 **Address Correspondence and Reprint Requests to:**

35 Craig S. Atwood, Ph.D.  
36 University of Wisconsin-Madison School of Medicine and Public Health  
37 Wm S. Middleton Memorial VA (GRECC 11G)  
38 2500 Overlook Terrace, Madison, WI 53705, USA  
39 Tel. 608 256-1901, Ext. 11664  
40 Fax. 608 280-7291  
41 Email: [csa@medicine.wisc.edu](mailto:csa@medicine.wisc.edu)  
42  
43  
44  
45  
46  
47  
48  
49  
50  
51  
52  
53  
54  
55  
56  
57  
58  
59  
60

**ABSTRACT**

**Objectives:** Single genetic loci offer little predictive power for the identification of depression. This study examined whether an analysis of gene-gene interactions of 78 single nucleotide polymorphisms in genes associated with depression and age-related diseases would identify significant interactions with increased predictive power for depression.

**Design:** A retrospective cohort study.

**Setting:** A survey of participants in the Wisconsin Longitudinal Study.

**Participants:** A total of 4,811 persons (2,464 females and 2,347 males) who provided saliva for genotyping; the group comes from a randomly selected sample of Wisconsin high school graduates from the class of 1957 as well as a randomly selected sibling, almost all of whom are non-Hispanic white.

**Primary outcome measure:** Depression as determined by the Composite International Diagnostic Interview short-form (CIDI-SF).

**Results:** Using a classification tree approach (recursive partitioning (RP)) we identified a number of candidate gene-gene interactions associated with depression. The primary SNP splits revealed by RP (*ANKK1* rs1800497 (also known as *DRD2* Taq1A) in men and *DRD2* rs224592 in women) were found to be significant as single factors by logistic regression (LR) after controlling for multiple testing ( $P=0.001$  for both). Without considering interaction effects, only 1 of the 5 subsequent RP splits reached nominal significance in logistic regression (*FTO* rs1421085 in women;  $P$ -value=0.008). However, after controlling for gene-gene interactions by running logistic regression on RP-specific subsets, every split became significant and grew larger in magnitude (OR [before]→[after]: Men: *GNRH1* novel SNP: [1.43 → 1.57]; Women: *APOC3* rs2854116: [1.28 → 1.55], *ACVR2B* rs3749386: [1.11 → 2.17], *FTO* rs1421085: [1.32 → 1.65], *IL6* rs1800795: [1.12 → 1.85]).

**Conclusions:** Our results suggest that examining gene-gene interactions improves the identification of genetic associations predictive of depression. Four of the SNPs identified in these interactions were located in two pathways well-known to impact depression: neurotransmitter (*ANKK1* and *DRD2*) and

Formatted: Font: Italic

1  
2  
3  
4  
5  
6  
7  
8  
9  
10  
11  
12  
13  
14  
15  
16  
17  
18  
19  
20  
21  
22  
23  
24  
25  
26  
27  
28  
29  
30  
31  
32  
33  
34  
35  
36  
37  
38  
39  
40  
41  
42  
43  
44  
45  
46  
47  
48  
49  
50  
51  
52  
53  
54  
55  
56  
57  
58  
59  
60

neuroendocrine (*GNRH1* and *ACVR2B*) signaling. This study demonstrates the utility of RP analysis as an efficient and powerful exploratory analysis technique for uncovering genetic and molecular pathway interactions associated with disease etiology.

For peer review only

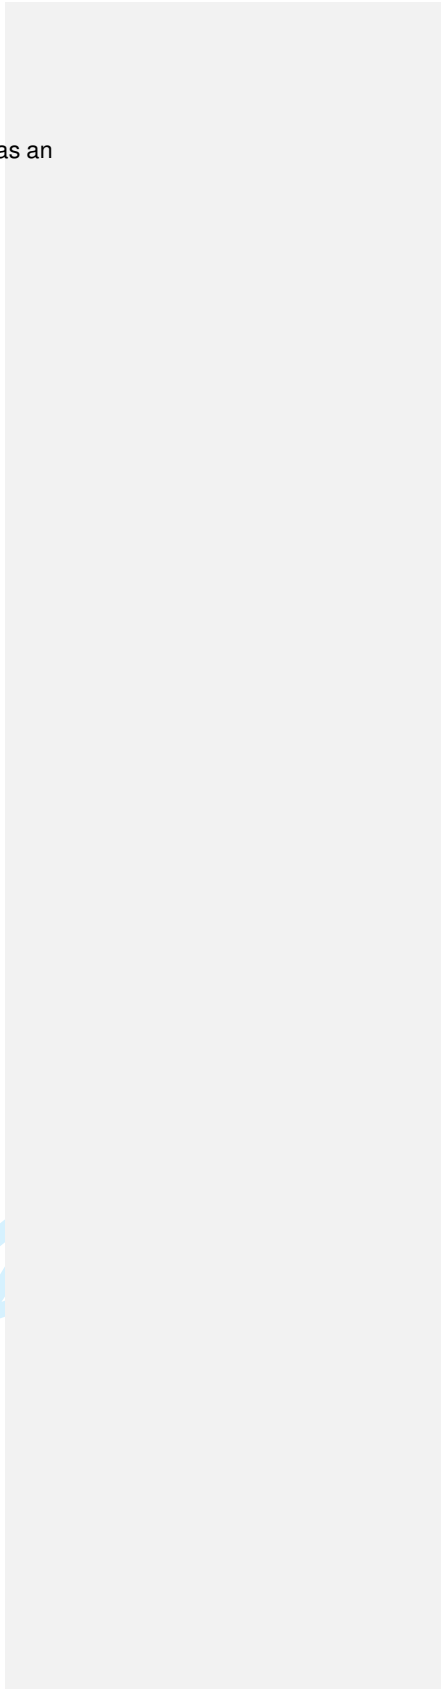

## INTRODUCTION

Depression is a widespread mental disorder associated with a host of undesirable health, social, and economic outcomes. One in six Americans is diagnosed with depression in his or her lifetime (1). While many environmental factors—such as socioeconomic status, childhood abuse, and major life events—have important ties with depression, so too does gender and many genetic and epigenetic factors, making the disorder heterogeneous in nature (2). Another major risk factor for depression is age, with depression reaching its highest levels in adults over 80 years of age (3).

It has been demonstrated from twin studies that genetic factors typically account for 40–70% of the risk for developing major depressive disorder (MDD), and adoption studies have confirmed the role of genetic risk factors in the development of MDD (see (4) and references therein). Genetic studies, including recent genome-wide association studies (GWAS), have identified genetic alterations in over 50 genes known to be associated with depression (5). However, individually, the genetic alterations found within these genes (primarily single nucleotide polymorphisms (SNPs)) have little predictive value. There is a similar lack of predictive value from GWAS of other major age-related diseases (6).

Given this lack of predictive power among individual genetic alterations for depression together with the complex nature of aging-related diseases, it would seem prudent to examine epistatic effects on this age-related condition. In this respect, we have previously demonstrated that G x G interactions greatly modulate risk for complex age-related diseases (7, 8). Recent studies of depression also have identified epistatic effects. In particular, associations have been identified between *BDNF* Val66Met (brain-derived neurotrophic factor; rs6265) and *5-HTTLPR* (serotonin transporter linked promoter region) (9); *GSK3B* rs6782799 (glycogen synthase kinase 3 $\beta$ ), *BDNF* rs7124442 and *BDNF* Val66Met (10); *BDNF* Val66Met and SNPs in *NTRK2* (neurotrophic tyrosine kinase receptor 2; (11)), and *5-HTTLPR* short allele and a chromosome 4 gene (12). [The machine learning tool recursive partitioning has recently been used by Wong \(13\) in order to assess complex gene-gene interactions in depression. Wong notes that recursive partitioning is useful in that it quickly explores high dimensional data for non-linear effects that are non-](#)

1  
2  
3  
4  
5  
6  
7  
8 biased and easily interpretable.

9  
10 The goals of this study were therefore to 1) explore G x G interactions that might better predict the  
11 genetic factors involved in the etiology of depression, and 2) to further demonstrate the utility of machine  
12 learning algorithms (recursive partitioning) to identify genetic interactions. Using genotypic data from the  
13 Wisconsin Longitudinal Study (WLS) we identified associations between dopaminergic genes and  
14 depression in men and women, as well as G x G interactions involving neuroendocrine signaling  
15 pathways, with increased significance compared with single genetic associations.  
16  
17  
18  
19  
20  
21  
22  
23  
24  
25  
26  
27  
28  
29  
30  
31  
32  
33  
34  
35  
36  
37  
38  
39  
40  
41  
42  
43  
44  
45  
46  
47  
48  
49  
50  
51  
52  
53  
54  
55  
56  
57  
58  
59  
60

## METHODS

### Study Participants and Surveys

Data were collected from the WLS, a random sample originally comprised of 10,317 men and women who graduated from Wisconsin high schools in 1957. Later in 1977, the WLS began interviewing one randomly selected sibling of each graduate, when possible. The cohort reflects the ancestral makeup of the late-1950s Wisconsin population in that participants are almost entirely non-Hispanic white males and females. . In general, the sample is broadly representative of older white Americans with at least a high school education (14). Further characteristics of the WLS cohort may be found in detail elsewhere (15). Health and psychological well-being phenotypic data was taken from mail and phone surveys given in 2004-2005. Inclusion criteria for depression included any member of the WLS cohort who was depressed according to the Composite International Diagnostic Interview short-form (CIDI-SF). Individuals who answered YES to the question "Have you ever had a time in life lasting two weeks or more when nearly every day you felt sad, blue, depressed, or when you lost interest in most things like work, hobbies, or things you usually liked to do for fun?" and whose depression was not caused by alcohol, drugs, medications, or physical illness were asked further depression symptom questions. Symptom questions asked whether the two week period was accompanied with a) any weight loss, b) trouble sleeping, c) feeling tired, d) feeling bad upon waking, e) losing interest, f) trouble concentrating, or g) thoughts about death. Those answering YES to 3 or more of these symptom questions were classified as having depression (16). Those answering YES to 2 or fewer symptom questions and all those answering NO to the initial stem question were classified as controls.

~~Data were collected from the WLS, a random sample originally comprised of 10 317 men and women who graduated from Wisconsin high schools in 1957. Later in 1977, the WLS began interviewing one randomly selected sibling of each graduate, when possible. The cohort consists reflects the ancestral makeup of the late 1950s Wisconsin population in that participants are almost entirely of non-Hispanic white personsmales and females, whose average level of educational attainment was 1.5 years of post-~~



1  
2  
3  
4  
5  
6  
7  
8 high school education at the time of interview in 2004. Ages of participants in the WLS ranged from 35 to  
9 90 years old at this time, with 83% of participants being between 60 and 70 years old. In general, the  
10 sample is broadly representative of older white Americans with at least a high school education (14).  
11  
12 Further characteristics of the WLS cohort may be found in detail elsewhere (15). Health and psychological  
13 well-being phenotypic data was taken from mail and phone surveys given in 2004-2005. Our main  
14 measure of depression is based on a variation of the Composite International Diagnostic Interview short-  
15 form (CIDI-SF). All participants answered a single stem question: "Have you ever had a time in life lasting  
16 two weeks or more when nearly every day you felt sad, blue, depressed, or when you lost interest in most  
17 things like work, hobbies, or things you usually liked to do for fun?" Only those who answered YES and  
18 whose depression was not always caused by alcohol, drugs, medications, or physical illness were asked  
19 further depression symptom questions. Symptom questions asked whether the two week period was  
20 accompanied with a) any weight loss, b) trouble sleeping, c) feeling tired, d) feeling bad upon waking, e)  
21 losing interest, f) trouble concentrating, or g) thoughts about death. Those answering YES to 3 or more of  
22 these symptom questions were classified as having depression (16). Those answering YES to 2 or fewer  
23 symptom questions and all those answering NO to the initial stem question were classified as controls.  
24  
25  
26  
27  
28  
29  
30  
31  
32  
33  
34

Formatted: Font color: Red

### 35 36 Genotyping

37 7,101 participants (4,569 graduates & 2,532 siblings) provided saliva samples in Oragene DNA sample  
38 collection kits from which DNA was extracted and genotyped for 78 SNPs that were selected based on  
39 their association with depression and age-related conditions and diseases (see Supplementary  
40 Information 1). Genotyping was performed by KBioscience (Hoddesdon, UK) with use of a homogeneous  
41 Fluorescent Resonance Energy Transfer technology coupled to competitive allele specific PCR. All SNP  
42 genotypes described in our results were in Hardy-Weinberg equilibrium and their frequencies matched  
43 those reported in the literature for European samples.  
44  
45  
46  
47  
48  
49  
50  
51  
52  
53  
54  
55  
56  
57  
58  
59  
60

### Statistical Analysis

Analyses were limited to the 4,811 pooled graduates and siblings for whom we have depression and genotype information (Note: individuals with more than 10% missing genotype data were not included). The average age among this sample was just under 65 years in 2004. 80% were married, and the average amount of post-high school educational attainment was 2 years. Median household income in 1993 was \$56,700.

*Recursive Partitioning (RP)*. RP is a data mining tool for revealing trends that relate a dependent variable (depressed vs. non-depressed) to various predictor variables (SNPs). Zhang and Bonney have shown how RP can be used in genetic association studies to identify disease genes (17). RP helps control for heterogeneity in the population and confounding factors by allowing for the segregation of the sample population according to any condition. Thus, RP is a useful way to handle complex datasets that might confound regression analysis due to the complexity of the relationship between the independent and dependent variables and due to missing information.

RP classification trees (using R package rpart) were used to identify potential interactions among the 78 SNPs in relation to depression. The trees split the data along branches according to criteria determined by the rpart package algorithm, which is originally based off the work of Breiman's classification and regression trees (CART) algorithm (18). Basically, the CART algorithm first considers all depressed and non-depressed subjects pooled together in a heterogeneous root node. Based on considering every possible "yes-no" binary partition that can be made by each independent variable, the single split which maximizes homogeneity between the two resulting sub-nodes as compared to the root node is made. Each sub-node can then be treated independently as a new root node for all subsequent splits, and the pattern continues until every subject constitutes a terminal node, resulting in a very large and complex tree. A 10-part cross validation procedure seeking to minimize misclassification and complexity determines optimal pruning. See Therneau and Atkinson (19) for specific details of the rpart package.

1  
2  
3  
4  
5  
6  
7  
8 Priors were set to 0.5, 0.5. The usesurrogate parameter was set to 0 so that subjects missing the primary  
9 split variable do not progress further down the tree, and maxsurrogate was set to 0 to cut computation  
10 time in half. The threshold complexity parameter (cp) was set to 0.01. Tree nodes were re-created in  
11 Microsoft Visio to display percentage depressed depression incidence (in-%) and total number of  
12 participants rather than and the default number of controls/cases as presented by rpart.  
13  
14  
15  
16  
17

18 *Logistic Regression (LR).* Variables found in association with depression based on RP analysis were  
19 considered in single factor LR models, separate by gender, using the specific dichotomous splitting of  
20 genotypes as designated by RP trees. Regression models for all seven SNP splits were first run on the full  
21 dataset to represent single main factor effects. Then each split was run on the respective subset of data  
22 as represented by the preceding RP split criteria. Thus, we attempt to mirror RP splits within a more  
23 formal LR framework in order to measure the significance of interactions presented by the trees. Multiple  
24 testing of 78 SNPs in RP for both male and females followed by 14 LR models resulted in a modified FDR  
25 significance level of 0.009.  
26  
27  
28  
29  
30  
31  
32  
33  
34  
35  
36  
37  
38  
39  
40  
41  
42  
43  
44  
45  
46  
47  
48  
49  
50  
51  
52  
53  
54  
55  
56  
57  
58  
59  
60

## RESULTS

Of the 4,811 participants (2,464 females and 2,347 males) under examination in this study, we identified 713 participants (481 females and 232 males) with depression (14.8 %). Given that the independent variable gender (when included as a factor in the full dataset) was the primary split on RP trees; that women are over two times as likely to be diagnosed with depression than men; and since the female etiology of depression has been reported to be associated with unique social, psychological, and biological factors (20), all subsequent analyses were performed by gender.

### Recursive Partitioning Analysis

To examine multi-gene interactions for association with depression we screened our dataset using RP. The two-factor RP tree (*ANKK1/GNRH1*) was the optimized pruning for men (Fig. 1), while the five-factor tree (*DRD2/APOC3/ACVR2B/FTO/IL6*) was the optimized pruning for women (Fig. 2). [For more detailed information on the 7 SNPs found by RP, see Supplementary Information 2. Note that subjects are lost in every step down each tree due to missing genotype information. We lose approximately 1.5% of data per split in men and 1.4% of data per split in women.](#)

The best overall split for men was *ANKK1* rs1800497 ([historically known as the \*DRD2\* Taq1A allele](#)), where the incidence of depression increased 2.2-fold in those with no C-alleles compared to those with one or two C-alleles. Considering interaction between *ANKK1* and *GNRH1* widened the disparity in incidence, where those with at least one C-allele in both *ANKK1* rs1800497 and the novel SNP in *GNRH1* had a 2.7-fold lower incidence than those without a C-allele in *ANKK1* rs1800497.

For women, the best overall split was *DRD2* rs2242592, where those with one or two C-alleles had 1.3-fold higher incidence of depression compared to those without any C-alleles. G x G interactions associated with the highest incidence of depression included: *DRD2* rs2242592 T/T + *APOC3* rs45537037 T/T + *ACVR2B* rs3749386 C/C or T/T, accounting for a 1.4-fold increase in depression compared to baseline incidence.

### Single Main-Factor Effects

Specific SNP interactions identified by RP were next analyzed by LR (see Table 1, Full Data). The primary SNP splits in males and females were significant at the modified FDR level. Men with no C-alleles for *ANKK1* rs1800497 had 2.55 times higher odds [P=0.001 (1.44, 4.51)] of depression compared with men with at least 1 C-allele. Women with at least 1 C-allele for *DRD2* rs2242592 had 1.32 times higher odds [P=0.006 (1.08-1.62)] of depression compared with women with no C-alleles. One other split reached nominal significance; women homozygous (C/C or T/T) for *FTO* rs1421085 had 1.32 times higher odds [P=0.008 (1.08-1.62)] for depression than women with a heterozygous genotype. SNP splits of *GNRH1*, *APOC3*, *ACVR2B*, and *IL6* did not significantly associate with depression.

### Gene-Gene Interactions Enhance Predictability for Depression

Specific SNP interactions identified by RP were next analyzed by LR as RP-specific subsets (see Table 1, RP-Subsetted Data). All 5 of the secondary and tertiary RP splits were found to be significant at the modified FDR level when considered as subsets. Among only men with at least one C-allele in *ANKK1* rs1800497, those with no C-allele in the novel SNP of *GNRH1* had 1.57 times higher odds [P=0.002 (1.18-2.08)] for depression than men with 1 or 2 C-alleles. For the subset of women in the first right-hand split of Fig. 2, those homozygous for *FTO* rs1421085 had 1.65 times higher odds [P=0.0005 (1.24-2.18)] for depression than women with a heterozygous genotype. For the remaining subset of women in the second right-hand split of Fig. 2, those homozygous for *IL6* rs1800795 had 1.85 times higher odds [P=0.006 (1.19-2.89)] for depression than women with a heterozygous genotype. For the subset of women in the first left-hand split of Fig. 2, those with no C-alleles for *APOC3* rs45537037 had 1.55 times higher odds [P=0.004 (1.15-2.09)] for depression than women with 1 or 2 C-alleles. For the subset of women in the second left-hand split of Fig. 2, those homozygous for *ACVR2B* rs3749386 had 2.17 times higher odds [P=0.001 (1.37-3.44)] for depression than women with a heterozygous genotype.

## DISCUSSION

Utilizing RP as a screening tool to find potential multi-gene interactions, followed by verification of multi-gene interactions with LR, our data demonstrate that multi-gene interactions predict depression with a greater certainty than single main factor associations. RP provided us with primary dichotomous genotype splits in men and women (*ANKK1* rs1800497 and *DRD2* rs2242592, respectively) that were both significant in LR models at the modified FDR level (Table 1). Considering the 5 subsequent RP splits in LR over the entire dataset, only 1 reached a nominal level of significance (barely), which was *FTO* rs1421085 in women. However, after running LR on specific subsets of data according to the pattern of RP branches, every split was found to be significant and every odds ratios grew larger (Table 1; OR [before]→[after]: Male Left: 1.43 → 1.57, Female Left 1: 1.28 → 1.55, Female Left 2: 1.11 → 2.17, Female Right 1: 1.32 → 1.65, Female Right 2: 1.12 → 1.85). Thus, RP provides two unique and important criteria: dichotomous genotype splitting instructions and gene-gene interaction patterns. These criteria go beyond the traditional single factor SNP approach to genetic association studies and allow identification of important multi-gene pathways that more suitably characterize the etiology of complex diseases.

### The Utility of Recursive Partitioning and Logistic Regression for Identification of Gene-Gene Interactions

With recent advances in genotyping allowing for high-dimensional SNP identification, it is now possible to examine genetic datasets not only for single main factor effects, but also G x G interactions. The requirement for G x G analyses as a better predictor of age-related diseases is obvious from the standpoint that humans are complex biological systems composed of numerous molecular interactions, and from recent studies indicating disease risk is modulated by G x G interactions (7). Notwithstanding this, the development of analytical tools for the identification of G x G interactions has not kept pace with the technological advances in identifying genetic alterations among individuals. In this respect, we have

1  
2  
3  
4  
5  
6  
7  
8  
9 previously used MDR, LR and LD to identify G x G interactions among a small set of SNPs (7). However,  
10 large datasets require a screening tool to identify potential multi-gene interactions. In this study, we have  
11 used RP to screen for multi-gene interactions, a data-mining technique that is currently under-utilized in  
12 genetic studies. RP serves as an efficient and powerful exploratory analysis technique, especially when  
13 looking for interactions in data sets with a large number of independent variables. This screening allows  
14 for the identification of G x G interactions (with greater explanatory power), that might otherwise not have  
15 been identified, and that can then be confirmed using more traditional statistical techniques. As illustrated  
16 in this paper, this data-mining methodology has the advantage of identification of genetic interactions  
17 *between* pathways involved in the etiology of depression, in keeping with the etiological heterogeneity of  
18 this disorder (see later).  
19  
20  
21  
22  
23  
24  
25

26 Our study provides proof of principle for the use of RP in higher-dimensional analyses such as GWAS,  
27 where a comprehensive list of SNPs may fully explore genetic predisposition to depression and other age-  
28 related disease. The WLS is an ideal candidate for future GWAS studies given its large sample size, rich  
29 covariate composition and longitudinal nature.  
30  
31  
32

33 In this genetic study we aimed to identify underlying genetic predispositions to depression and thus  
34 have not yet tested environmental/phenotypic data. Future analyses using RP to examine the impact of  
35 phenotypic and environmental factors on the development of depression would be anticipated to identify  
36 gene-phenotype/environment and multi-phenotype/environment interactions. Indeed, the predictive gains  
37 of G x G analyses were stronger for men than women, despite the fact that depression occurs  
38 disproportionately in women (~2:1 female-to-male; (21-25)). This suggests that environmental factors may  
39 be needed in addition to genetic factors in understanding the etiological pathways for women. Indeed,  
40 biological factors such as hormonal changes related to reproductive status (26, 27) may impact  
41 environmental factors such as psychosocial experiences (trauma, stress, interpersonal relationships, etc)  
42 and general health issues in the development of depression.  
43  
44  
45  
46  
47  
48  
49  
50  
51  
52  
53  
54  
55  
56  
57  
58  
59  
60

### Genetic and Biological Correlates of Depression

Numerous studies have identified SNPs that associate with depression. Many of the SNPs associated with depression from other studies were not significantly associated in our study. This is perhaps not surprising, since a single factor is unlikely to provide consistent association especially in a complex condition such as depression, where multiple pathways intersect in regulating the risk of the disease. For example, if a SNP within the serotonin pathway also requires a SNP in the glutamatergic pathway in order for the patient to present with depression, the presence of either SNP in the absence of the other will not be predictive of depression. Moreover, as indicated by Shi and Weinberg, since the human genome contains genetic redundancy, disruption of a single gene may be selectively neutral, but the malfunction of several genes in a pathway might result in expression of a particular phenotype (28).

Both the primary splits in men and women were SNPs linked with *DRD2* (dopamine receptor D2), a gene that has previously been linked with depression and social phobia (29-31). The primary male genotype split rs1800497, technically found in gene *ANKK1*, is historically known as the *DRD2* Taq1A allele because of its known association with decreased dopamine receptor D2 density (in those with T alleles) (32-35). The Taq1A allele has also been previously associated with depressive symptoms in children, where those with the A1 allele (T) were more likely to have depressive symptoms (36). We saw a similar association between A1 and depression in WLS men, where those with two A1 alleles had 2.6 times higher odds for depression compared to those with one or no A1 alleles. The primary split in women (*DRD2* rs2242592) has previously been found to be associated with schizophrenia, where the C-allele was associated with higher susceptibility for schizophrenia (37). Interestingly, this same study also found the Taq1A allele to also associate with schizophrenia.

The secondary and tertiary right-hand splits in the female RP tree—*FTO* (fat mass and obesity associated) rs1421085 and *IL6* (interleukin 6) rs1800795—have also been found to relate with mental illness and depression in previous studies (38, 39). There is evidence that activin receptor signaling also is involved in affective disorders, especially when considering interaction with GABAergic pathways (40).



1  
2  
3  
4  
5  
6  
7  
8  
9 Although we did not see an interaction between SNPs in GABA/activin receptor genes and depression,  
10 *ACVR2B* was associated with depression in women. No previous associations between depression and  
11 *APOC3*, *ACVR2B*, or *GNRH1* have been reported.

12  
13  
14 That these genetic variants are associated with *neuroendocrine* pathways (*GnRH1*, *ACVR2B*) that are  
15 known to regulate *neurotransmitter* release and cognitive behavior (39-40) supports these associations as  
16 relevant to the etiology of depression and underlines the benefits of using RP to identify meaningful G x G  
17 interactions associated with disease.  
18  
19  
20

### 21 22 Limitations

23  
24 Given the numerous genetic, phenotypic and environmental influences that are linked to depression,  
25 and the small number of SNPs analyzed, it is not surprising that predictability from our models was low  
26 (although our predictability was superior to previous studies examining only single main factors). Also, the  
27 predictive value of our statistical models was further limited due to user bias in selection of SNPs (from  
28 nearly two-million SNPs in the human genome) used in this study. As a result of this, interactions we have  
29 found could potentially be moderated by another gene that we have not considered in this study.  
30  
31 Nonetheless, we identified significant G x G interactions between known, and newly identified, loci  
32 associated with depression. Importantly, 4 of the 7 SNPs identified in these interactions were primarily  
33 located in two pathways well-known to impact depression: neurotransmitter and neuroendocrine signaling.  
34  
35  
36  
37  
38  
39

40 The results from the RP analyses conducted in this study were confirmed by LR, demonstrating the  
41 utility of RP as a screening tool for identifying meaningful G x G interactions. Future development of  
42 algorithms for RP analysis should not only maximize the distance between branches of the next best split  
43 (i.e. rpart), but consider subsequent future split combinations that could potentially result in trees with  
44  
45  
46  
47 “better” overall predictability.  
48  
49

### 50 Summary

1  
2  
3  
4  
5  
6  
7  
8  
9 Our data indicate that G x G interaction analyses allows for enhanced predictability of conditions and  
10 diseases of aging. RP is an efficient and powerful exploratory analysis technique for elucidating G x G  
11 interactions in large datasets and combined with LR provides an important statistical analysis for the  
12 identification of well supported G x G interactions. We predict that such analytical methods will play an  
13 increasingly important role in the identification of epistatic effects in future large GWAS. Finally, our  
14 studies illustrate how RP analyses can be used to find interacting pathways involved in the etiology of a  
15 disease or condition such as depression.  
16  
17  
18  
19  
20  
21  
22  
23  
24  
25  
26  
27  
28  
29  
30  
31  
32  
33  
34  
35  
36  
37  
38  
39  
40  
41  
42  
43  
44  
45  
46  
47  
48  
49  
50  
51  
52  
53  
54  
55  
56  
57  
58  
59  
60

## ACKNOWLEDGMENTS

This research uses data from the Wisconsin Longitudinal Study (WLS) of the University of Wisconsin-Madison. Since 1991, the WLS has been supported principally by the National Institute on Aging (AG-9775, AG-21079 and AG-033285), with additional support from the Vilas Estate Trust, the National Science Foundation, the Spencer Foundation, and the Graduate School of the University of Wisconsin-Madison. A public use file of data from the Wisconsin Longitudinal Study is available from the Wisconsin Longitudinal Study, University of Wisconsin-Madison, 1180 Observatory Drive, Madison, Wisconsin 53706 and at <http://www.ssc.wisc.edu/wlsresearch/data/>. This material is the result of work supported with resources at the William S. Middleton Memorial Veterans Hospital, Madison, WI. The opinions expressed herein are those of the authors. The contents do not represent the views of the Dept. of Veterans Affairs or the United States Government.

## FIGURE LEGENDS

**Figure 1.** Recursive Partitioning Tree of CIDI-SF Depression in Males of the WLS. Upper and lower numbers in nodes represent the percentage of participants with depression and the number of controls/cases in that node, respectively. Blue and purple boxes/circles indicate lower and higher rates of depression relative to the primary node, respectively. Split information indicates gene, SNP, and genotype criteria, respectively. M1 is subset of data referenced in Table 1. Sensitivity: 0.526, Specificity: 0.598, Accuracy: 0.591. [Due to missing genotype information, we lose approximately 1.5% of participants per split. \\*rs1800497 is historically known as the DRD2 Taq1A allele](#)

**Figure 2.** Recursive Partitioning Tree of CIDI-SF Depression in Females of the WLS. Upper and lower numbers in nodes represent the percentage of participants with depression and the number of controls/cases in that node, respectively. Blue and purple boxes/circles indicate lower and higher rates of depression relative to the primary node, respectively. Split information indicates gene, SNP, and genotype criteria, respectively. F1-F4 are subsets referenced in Table 1. Sensitivity: 0.607, Specificity: 0.563, Accuracy: 0.572. [Due to missing genotype information, we lose approximately 1.4% of participants per split.](#)

1  
2  
3  
4  
5  
6  
7  
8  
9  
10  
11  
12  
13  
14  
15  
16  
17  
18  
19  
20  
21  
22  
23  
24  
25  
26  
27  
28  
29  
30  
31  
32  
33  
34  
35  
36  
37  
38  
39  
40  
41  
42  
43  
44  
45  
46  
47  
48  
49  
50  
51  
52  
53  
54  
55  
56  
57  
58  
59  
60

For peer review only

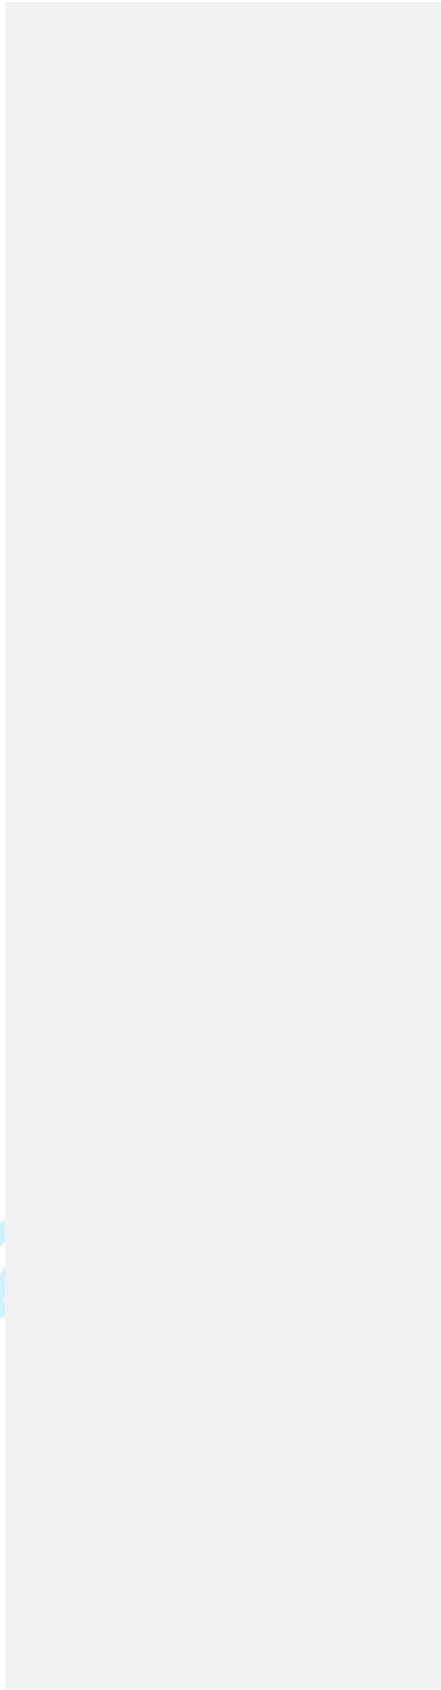

**Table 1.**

Single-factor logistic regression models based directly off male and female RP tree split criteria (see Figures 1 & 2). Each SNP split was first run on the full dataset to represent single main factor effects ("Full Data") for both males and females. Then the same SNP splits were run on specific subsets of data per RP tree splits (M1, F1-F4; "RP-Subsetted Data").

| Gender | RP Split | Gene          | SNP       | Genotypes         | Full Data        |         | RP-Subsetted Data |                  |          |
|--------|----------|---------------|-----------|-------------------|------------------|---------|-------------------|------------------|----------|
|        |          |               |           |                   | OR (95% CI)      | P-value | Subset            | OR (95% CI)      | P-value  |
| Male   | Primary  | <i>ANKK1*</i> | rs1800497 | T/T vs. C/C + C/T | 2.55 (1.44-4.51) | 0.001 * | --                | ----             | ----     |
|        | Left     | <i>GNRH1</i>  | novel SNP | T/T vs. C/C + T/C | 1.43 (1.09-1.88) | 0.011   | M1                | 1.57 (1.18-2.08) | 0.002 *  |
| Female | Primary  | <i>DRD2</i>   | rs2242592 | C/C + T/C vs. T/T | 1.32 (1.08-1.62) | 0.006 * | --                | ----             | ----     |
|        | Left 1   | <i>APOC3</i>  | rs2854116 | T/T vs. C/C + T/C | 1.28 (1.04-1.57) | 0.018   | F1                | 1.55 (1.15-2.09) | 0.004 *  |
|        | Left 2   | <i>ACVR2B</i> | rs3749386 | C/C + T/T vs. T/C | 1.11 (0.91-1.36) | 0.302   | F2                | 2.17 (1.37-3.44) | 0.001 *  |
|        | Right 1  | <i>FTO</i>    | rs1421085 | C/C + T/T vs. T/C | 1.32 (1.08-1.62) | 0.007 * | F3                | 1.65 (1.24-2.18) | 0.0005 * |
|        | Right 2  | <i>IL6</i>    | rs1800795 | C/C + G/G vs. C/G | 1.12 (0.92-1.37) | 0.269   | F4                | 1.85 (1.19-2.89) | 0.006 *  |

RP, recursive partitioning; OR, odds ratio; CI, confidence interval

M1: LR analysis was run for only those with genotype *DRD2* rs1800497 C/C or C/T

F1: LR analysis was run for only those with genotype *DRD2* rs2242592 T/T

F2: LR analysis was run for only those with genotypes *DRD2* rs2242592 T/T and *APOC3* rs2854116 T/T

F3: LR analysis was run for only those with genotype *DRD2* rs2242592 C/C or T/C

F4: LR analysis was run for only those with genotypes *DRD2* rs2242592 C/C or T/C and *FTO* rs1421085 T/C

*\*rs1800497 is historically known as the DRD2 Taq1A allele*

1  
2  
3  
4  
5  
6  
7  
8  
9  
10  
11  
12  
13  
14  
15  
16  
17  
18  
19  
20  
21  
22  
23  
24  
25  
26  
27  
28  
29  
30  
31  
32  
33  
34  
35  
36  
37  
38  
39  
40  
41  
42  
43  
44  
45  
46  
47  
48  
49

For peer review only



**REFERENCES**

1. CDC. Anxiety and Depression. Atlanta, GA: Centers for Disease Control and Prevention; 2009 [cited 2010 Oct. 18]; Available from: <http://www.cdc.gov/Features/dsBRFSSDepressionAnxiety/>.
2. Eley TC, Sugden K, Corsico A, Gregory AM, Sham P, McGuffin P, et al. Gene-environment interaction analysis of serotonin system markers with adolescent depression. *Mol Psychiatry*. 2004;9(10):908-15.
3. Mirowsky J, Ross CE. Age and Depression. *Journal of Health and Social Behavior*. 1992;33(3):187-205.
4. Zubenko GS, Zubenko WN, Spiker DG, Giles DE, Kaplan BB. Malignancy of recurrent, early-onset major depression: a family study. *Am J Med Genet*. 2001 Dec 8;105(8):690-9.
5. Raymer KA, Waters RF, Price CR. Proposed multigenic Composite Inheritance in major depression. *Medical Hypotheses*. 2005;65(1):158-72.
6. Harold D, Abraham R, Hollingworth P, Sims R, Gerrish A, Hamshere ML, et al. Genome-wide association study identifies variants at CLU and PICALM associated with Alzheimer's disease. *Nat Genet*. 2009 Oct;41(10):1088-93.
7. Haasl R, Ahmadi MR, Meethal S, Gleason C, Johnson S, Asthana S, et al. A luteinizing hormone receptor intronic variant is significantly associated with decreased risk of Alzheimer's disease in males carrying an apolipoprotein E epsilon4 allele. *BMC Medical Genetics*. 2008;9(1):37.
8. Basson J, Wilson A, Haasl R, Atwood C. Multi locus interactions in steroidogenic pathway genes predict Alzheimer's disease. *Alzheimer's and Dementia*. 2008;4(4 (Suppl. 2)):T579: P3-199.
9. Pezawas L, Meyer-Lindenberg A, Goldman AL, Verchinski BA, Chen G, Kolachana BS, et al. Evidence of biologic epistasis between BDNF and SLC6A4 and implications for depression. *Mol Psychiatry*. 2008;13(7):709-16.



1  
2  
3  
4  
5  
6  
7  
8  
9  
10  
11  
12  
13  
14  
15  
16  
17  
18  
19  
20  
21  
22  
23  
24  
25  
26  
27  
28  
29  
30  
31  
32  
33  
34  
35  
36  
37  
38  
39  
40  
41  
42  
43  
44  
45  
46  
47  
48  
49  
50  
51  
52  
53  
54  
55  
56  
57  
58  
59  
60

10. Zhang K, Yang C, Xu Y, Sun N, Yang H, Liu J, et al. Genetic association of the interaction between the BDNF and GSK3B genes and major depressive disorder in a Chinese population. *Journal of Neural Transmission*. 2010;117(3):393-401.
11. Lin E, Hong CJ, Hwang JP, Liou YJ, Yang CH, Cheng D, et al. Gene-gene interactions of the brain-derived neurotrophic-factor and neurotrophic tyrosine kinase receptor 2 genes in geriatric depression. *Rejuvenation Res*. 2009;12(6):387-93.
12. Neff CD, Abkevich V, Potter J, Riley R, Shattuck D, Katz DA. Evidence for epistasis between SLC6A4 and a chromosome 4 gene as risk factors in major depression. *American Journal of Medical Genetics Part B: Neuropsychiatric Genetics*. 2010;153B(1):321-2.
13. Wong ML, Dong C, Andreev V, Arcos-Burgos M, Licinio J. Prediction of susceptibility to major depression by a model of interactions of multiple functional genetic variants and environmental factors. *Mol Psychiatry*. 2012 Mar 27.
14. Carr D, Khodyakov D. End-of-life health care planning among young-old adults: An assessment of psychosocial influences. *J Gerontol B-Psychol*. 2007 Mar;62(2):S135-S41.
15. Sewell WH. *As We Age : The Wisconsin Longitudinal Study, 1957-2001*: Center for Demography and Ecology University of Wisconsin--Madison; 2001.
16. Nelson CB, Kessler RC, Mroczek D. Scoring the World Health Organization's Composite International Diagnostic Interview Short Form (CIDI-SF; v1.0 NOV98). 1998.
17. Zhang H, Bonney G. Use of classification trees for association studies. *Genet Epidemiol*. 2000 Dec;19(4):323-32.
18. Breiman L, Friedman J, Olshen R, Stone C. *Classification and Regression Trees*. Boca Raton: Chapman and Hall/CRC; 1984.

- 1  
2  
3  
4  
5  
6  
7  
8  
9 19. Therneau T, Atkinson E, editors. Technical Report Series No. 61, An Introduction to Recursive  
10 Partitioning Using the RPART Routines. Rochester, MN: Department of Health Science Research, Mayo  
11 Clinic; 1997.  
12  
13  
14 20. Accortt EE, Freeman MP, Allen JJB. Women and Major Depressive Disorder: Clinical Perspectives  
15 on Causal Pathways. *Journal of Women's Health*. 2008;17(10):1583-90.  
16  
17 21. Kessler RC, McGonagle KA, Swartz M, Blazer DG, Nelson CB. Sex and depression in the National  
18 Comorbidity Survey. I: Lifetime prevalence, chronicity and recurrence. *J Affect Disord*. 1993 Oct-  
19 Nov;29(2-3):85-96.  
20  
21 22. Kessler RC, McGonagle KA, Nelson CB, Hughes M, Swartz M, Blazer DG. Sex and depression in  
22 the National Comorbidity Survey. II: Cohort effects. *J Affect Disord*. 1994 Jan;30(1):15-26.  
23  
24 23. Kessler RC, McGonagle KA, Zhao S, Nelson CB, Hughes M, Eshleman S, et al. Lifetime and 12-  
25 month prevalence of DSM-III-R psychiatric disorders in the United States. Results from the National  
26 Comorbidity Survey. *Arch Gen Psychiatry*. 1994 Jan;51(1):8-19.  
27  
28 24. Weissman MM, Bland R, Joyce PR, Newman S, Wells JE, Wittchen HU. Sex differences in rates of  
29 depression: cross-national perspectives. *J Affect Disord*. 1993 Oct-Nov;29(2-3):77-84.  
30  
31 25. Weissman MM, Olfson M. Depression in women: implications for health care research. *Science*.  
32 1995 Aug 11;269(5225):799-801.  
33  
34 26. Pajer K. New strategies in the treatment of depression in women. *The Journal of clinical*  
35 *psychiatry*. [Review]. 1995;56 Suppl 2:30-7.  
36  
37 27. Paykel ES. Depression in women. *Br J Psychiatry Suppl*. [Review]. 1991 May(10):22-9.  
38  
39 28. Shi M, Weinberg CR. How Much Are We Missing in SNP-by-SNP Analyses of Genome-wide  
40 Association Studies? *Epidemiology*. 2011 Nov;22(6):845-7.  
41  
42  
43  
44  
45  
46  
47  
48  
49  
50  
51  
52  
53  
54  
55  
56  
57  
58  
59  
60

1  
2  
3  
4  
5  
6  
7  
8  
9  
10  
11  
12  
13  
14  
15  
16  
17  
18  
19  
20  
21  
22  
23  
24  
25  
26  
27  
28  
29  
30  
31  
32  
33  
34  
35  
36  
37  
38  
39  
40  
41  
42  
43  
44  
45  
46  
47  
48  
49  
50  
51  
52  
53  
54  
55  
56  
57  
58  
59  
60

29. Lawford BR, Young R, Noble EP, Kann B, Ritchie T. The D2 dopamine receptor (DRD2) gene is associated with co-morbid depression, anxiety and social dysfunction in untreated veterans with post-traumatic stress disorder. *European Psychiatry*. 2006;21(3):180-5.
30. Klimek V, Schenck JE, Han H, Stockmeier CA, Ordway GA. Dopaminergic abnormalities in amygdaloid nuclei in major depression: a postmortem study. *Biol Psychiatry*. 2002 Oct 1;52(7):740-8.
31. Schneier FR, Liebowitz MR, Abi-Dargham A, Zea-Ponce Y, Lin SH, Laruelle M. Low dopamine D(2) receptor binding potential in social phobia. *Am J Psychiatry*. 2000 Mar;157(3):457-9.
32. Noble EP, Blum K, Ritchie T, Montgomery A, Sheridan PJ. Allelic Association of the D2 Dopamine Receptor Gene With Receptor-Binding Characteristics in Alcoholism or Gene ism. *Arch Gen Psychiatry*. 1991 July 1, 1991;48(7):648-54.
33. Thompson J, Thomas N, Singleton A, Piggott M, Lloyd S, Perry EK, et al. D2 dopamine receptor gene (DRD2) Taq1 A polymorphism: reduced dopamine D2 receptor binding in the human striatum associated with the A1 allele. *Pharmacogenetics*. 1997 Dec;7(6):479-84.
34. Pohjalainen T, Rinne JO, Nagren K, Lehtikoinen P, Anttila K, Syvalahti EK, et al. The A1 allele of the human D2 dopamine receptor gene predicts low D2 receptor availability in healthy volunteers. *Mol Psychiatry*. 1998 May;3(3):256-60.
35. Jonsson EG, Nothen MM, Grunhage F, Farde L, Nakashima Y, Propping P, et al. Polymorphisms in the dopamine D2 receptor gene and their relationships to striatal dopamine receptor density of healthy volunteers. *Mol Psychiatry*. 1999 May;4(3):290-6.
36. Hayden EP, Klein DN, Dougherty LR, Olino TM, Lipton RS, Dyson MW, et al. The dopamine D2 receptor gene and depressive and anxious symptoms in childhood: associations and evidence for gene-environment correlation and gene-environment interaction. *Psychiatr Genet*. 2010 Dec;20(6):304-10.

- 1  
2  
3  
4  
5  
6  
7  
8  
9 37. Dubertret C, Bardel C, Ramoz N, Martin P-M, Deybach J-C, Adès J, et al. A genetic schizophrenia-  
10 susceptibility region located between the ANKK1 and DRD2 genes. *Progress in Neuro-*  
11 *Psychopharmacology and Biological Psychiatry*. 2010;34(3):492-9.  
12  
13  
14 38. Kivimaki M, Jokela M, Hamer M, Geddes J, Ebmeier K, Kumari M, et al. Examining Overweight  
15 and Obesity as Risk Factors for Common Mental Disorders Using Fat Mass and Obesity-Associated (FTO)  
16 Genotype-Instrumented Analysis. *Am J Epidemiol*. 2011 Feb 15;173(4):421-9.  
17  
18  
19 39. Bull SJ, Huezio-Diaz P, Binder EB, Cubells JF, Ranjith G, Maddock C, et al. Functional  
20 polymorphisms in the interleukin-6 and serotonin transporter genes, and depression and fatigue  
21 induced by interferon-alpha and ribavirin treatment. *Mol Psychiatry*. 2009 Dec;14(12):1095-104.  
22  
23  
24 40. Zheng F, Adelsberger H, Muller MR, Fritschy JM, Werner S, Alzheimer C. Activin tunes GABAergic  
25 neurotransmission and modulates anxiety-like behavior. *Mol Psychiatry*. 2008;14(3):332-46.  
26  
27  
28  
29  
30  
31  
32  
33  
34  
35  
36  
37  
38  
39  
40  
41  
42  
43  
44  
45  
46  
47  
48  
49  
50  
51  
52  
53  
54  
55  
56  
57  
58  
59  
60
